1 **Title Page**

2

3 **The synchronization and adaptation of**  
4 ***Neurospora crassa* circadian and conidiation**  
5 **rhythms to short light-dark cycles**  
6

7 Running title: Adaptation of *Neurospora* conidiation to LD cycles

8

9 Huan Ma, <sup>1\*</sup> Luyao Li, <sup>1\*</sup> Jie Yan, <sup>2\*</sup> Yin Zhang, <sup>1</sup> Weirui Shi, <sup>3</sup> Yunzhen Li, <sup>1</sup>

10 Menghan Gao <sup>1</sup>, Siyu Pan <sup>1</sup>, Ling Yang, <sup>2</sup> Jinhua Guo <sup>1\*\*</sup>

11

12 <sup>1</sup> Key Laboratory of Gene Engineering of the Ministry of Education, School of Life Sciences, State Key  
13 Laboratory of Biocontrol, Sun Yat-sen University, Guangzhou 510006, China;

14 <sup>2</sup> School of Mathematical Sciences, Center for Systems Biology, Soochow University, Suzhou 215006,  
15 China;

16 <sup>3</sup> School of Life Sciences, The Chinese University of Hongkong, Hongkong 999077, China;

17

18 \* These authors contributed equally to this work. \*\* For correspondence. E-mail:  
19 Guojinhu@mail.sysu.edu.cn; Tel. 86-20-39332939; Fax 86-20-39332939.

22 **ABSTRACT** Circadian clocks control the physiological and behavioral daily rhythms  
23 to adapt to the changing environment with a period of ~24 h. However, the influence  
24 and mechanism of extreme light-dark cycles on the circadian clock remain unclear.  
25 We show that, in the fungus *Neurospora crassa* under short LD cycles, both the  
26 growth rate and the ratio of microconidia production contributes to adaptation in  
27 LD12:12 (light for 12 h and dark for 12 h, periodically). Mathematical modeling and  
28 experiments demonstrate that in short LD cycles, the expression of the core clock  
29 protein FREQUENCY is entrained to the LD cycles when  $LD > 3:3$  while it free runs  
30 when  $T \leq LD 3:3$ . We investigated the changes in circadian/diurnal rhythms under a  
31 series of different LD conditions, and the results showed that conidial rhythmicity can  
32 be adapted to the short LD cycles. We further demonstrate that the existence of  
33 unknown blue light photoreceptor(s) and the circadian clock might promote the  
34 conidiation rhythms that resonate with the environment. A high-intensity light induced  
35 the expression of a set of downstream genes involved in various metabolic pathways.  
36 The ubiquitin E3 ligase FWD-1 and the previously described CRY-dependent  
37 oscillator system were implicated in regulating conidiation under short LD conditions.

38

39 **KEYWORDS** *Neurospora crassa*; circadian clock; FREQUENCY (FRQ); conidiation; light/dark  
40 cycle

41

42

43 The Earth rotates with a period of approximately 24 h, which results in the periodic change in  
44 of many environmental factors. Circadian clocks are the inner mechanisms that allow  
45 organisms to adjust their physiology and behavior to the daily cycling of environmental  
46 factors, e.g., light and temperature (Bell-Pederen *et al.* 2005).

47 In certain ranges, non-24h light/dark cycles can entrain the circadian rhythms, and the  
48 flexibility of this entrainability dramatically varies among different organisms. Within the  
49 range of entrainment which is also called the limit of stable entrainment, the rhythms change  
50 in accordance with the non-24 T-cycles and show stable phase angles; beyond the ranges, the  
51 circadian clocks free-run (Refinetti 2004; Madrid *et al.* 1998; Boulos *et al.* 2002; Abraham *et*  
52 *al.* 2010; Jewett *et al.* 1994). The entrainment ranges have been characterized in a number of  
53 species including human, hamster and *Neurospora* (Ralph and Menaker 1988; Nsa *et al.* 2015;  
54 Dong *et al.* 2008; Dunlap *et al.* 2004; Binkley 1990; Czeisler *et al.* 1999). In the wild-type  
55 filamentous fungus *Neurospora crassa*, the conidiation banding rhythms are consistent with a  
56 range of T-cycles that include LD6:6, LD12:12 and LD14:14, which illustrates the masking  
57 effects (Nsa *et al.* 2015). These observations have been extended to conidiation rhythms in  
58 LD3:3 and LD9:9 (Dong *et al.* 2008). However, under extremely short T-cycles that exceed the  
59 thresholds, the rhythms free run in certain species, including *Neurospora*, *Canavalia*  
60 *ensiformis* and sparrow (Dunlap *et al.* 2004; Binkley 1990).

61 It is very challenging for the endogenous circadian rhythms to be entrained to non-24 h  
62 LD cycles compared to the rest-activity rhythms (Czeisler *et al.* 1999; Lewis and Lobban  
63 1957). Under such conditions, the endogenous rhythmicities may desynchronize with the  
64 behavioral rhythmicities, which leads to inadaptation or disorders that have been observed in  
65 a number of checked organisms (Czeisler *et al.* 1999; Ouyang *et al.* 1998; Highkin and  
66 Hanson 1954; Hut and Beersma 2011).

67 *Neurospora* is an important model organism for circadian clock study; it exhibits overt  
68 clock phenotype in its conidiation. On the molecular level, the core circadian clock system of  
69 *Neurospora* is composed of two positive elements: White Collar 1 (WC-1) and WC-2 and one  
70 negative element: FREQUENCY (FRQ). The FRQ/WC-based circadian oscillator (FWO)  
71 dictates the circadian rhythms at molecular and physiological levels (Hurley *et al.* 2015;  
72 Baker *et al.* 2012). WC-1 harbors three PER-ARNT-SIM (PAS) domains; it is responsible for

73 light responses of circadian clock as a blue light photoreceptor (Froehlich *et al.* 2002; He *et al.*  
74 2002).

75 Neurospora has several additional validated or putative photosensing-associated factors,  
76 including VVD, CRY, NOP-1, PHY-1 and PHY-2 (Schwerdtfeger and Linden 2001;  
77 Corrochano 2007). VIVID (VVD), another PAS domain-containing protein, is a  
78 flavin-binding blue-light photoreceptor that regulates the light responses and temperature  
79 compensation of the Neurospora circadian clock (Zoltowski *et al.* 2007; Heintzen *et al.* 2001).  
80 Interestingly, *acry-dependent oscillator gate-1 (cog-1)* mutation led to conidiation rhythmicity  
81 in constant light in Neurospora, suggesting a role for *cog-1* in regulating light sensing in the  
82 circadian clock. The *cog-1* related oscillator is called the CRY-dependent oscillator (CDO)  
83 system since it requires the blue-light photoreceptor CRYPTOCHROME (CRY) (Nsa *et al.*  
84 2015).

85 In this work, we investigated the influence of short light-dark cycling conditions on the  
86 circadian clock in Neurospora, and compared the effects of the different light-dark cycles on  
87 growth, microconidia production, conidiation rhythmicity and gene expression. The findings  
88 of this work would shed new light on the knowledge of circadian clocks under conditions  
89 with extreme T-cycles.

90

## 91 **Materials and Methods**

### 92 ***Media, growth conditions and transformation procedure***

93 The *Neurospora crassa* 301-5 (*ras-1<sup>bd</sup>*, *a*) strain was used as the wild-type strain in this work.  
94 The 2% LCM media contained 1Vogel's medium and 0.17% arginine, with 2% glucose. The  
95 race tube solid media consisted of 1Vogel's medium containing 2% glucose, 50 ng of  
96 biotin/ml, and 1.5% agar.

97 The 315-13 (*fwd-1<sup>RIP</sup>*, *his-3*) strain, a strain in which the *fwd-1* was disrupted, was  
98 obtained from Dr Yi Liu's lab and described previously (He *et al.* 2003). The *vvd<sup>KO</sup>* strain was  
99 obtained from FGSC. All of the strains information are listed in supplemental Table S1.

100 Conidia were inoculated to seed mycelial mats in petri dishes, and disks were cut from  
101 these and used for 50-ml liquid cultures under certain LD conditions. At designated time  
102 points the cultures were harvested by filtration, frozen in liquid nitrogen, and ground in liquid

103 nitrogen. Protein extraction, quantification and western blot analysis were conducted as  
104 described elsewhere (Görl *et al.* 2001). For western blotting, equal amounts of total protein  
105 (50 µg) were loaded in each protein lane of SDS-PAGE (7.5%) gels containing a ratio of  
106 37.5:1 acrylamide/bisacrylamide.

107 An incubator (Percival Scientific, USA) was used to simulate different LD cycles, the  
108 white light intensity during light was 5000 lux or 1000 lux as indicated. The red light ( $\lambda=$   
109 660nm) was generated by an LED lamp, and the intensity was 5000 lux or 1000 lux as  
110 indicated. The blue light ( $\lambda=$  470 nm) was generated by an LED lamp, and the intensity was  
111 5000 lux or 1000 lux as indicated.

112 The counting of microconidia was conducted on a hemocytometer under an optical  
113 microscope. Basically, since the shape of microconidia is nearly round and they usually  
114 contain a single nucleus, we consider those hyphae with length/width ratio  $<1.5$  as a  
115 subjective criteria as microconidia.

#### 116 **Race tube assay**

117 The conidiation banding profiles were assayed on race tubes under standard conditions (Nsa *et al.*  
118 2015). The growth front was marked every 24 h under a red safe light in all light conditions in this  
119 work. All race tube experiments were carried out at room temperature (25°C).

#### 120 **Protein analysis**

121 Protein extraction, quantification, western blot analysis was performed as previously  
122 described (Guo *et al.* 2010).

#### 123 **Dynamic modeling**

124 See supplemental materials for details.

#### 125 **RNA-seq and analysis**

126 The strains subjected to RNA-seq were grown and the RNA samples were isolated from duplicates. All  
127 of the Pearson's Correlation values between each duplicates were  $>0.99$ . Tophat was used as the  
128 aligner to map the reads to the reference genome [*N. crassa* OR74A (NC12)]. The genes showing  
129  $\geq 2$ -fold increase were selected for further analysis. RNA-seq data sets are available at the GEO  
130 database (GSE108814). See supplemental materials for more details.

#### 131 **Statistical analysis**

132 Data are mean  $\pm$  SE or mean  $\pm$  SD where indicated.  $n \geq 3$ . Student's *t* test was used for all statistical

133 analyses. \* represents the p-value of the statistical tests is less than the significance level of 0.05 ( $p \leq 0.05$ );  
134 \*\* represents  $p \leq 0.01$  and \*\*\* represents  $p \leq 0.001$ .

### 135 **Data availability**

136 All strains and reagents are available upon request. The RNA-seq data sets are available at the  
137 GEO database (GSE108814). File S1 contains Table S1, Table S1, Figures S1-S5 and  
138 supplemental methods and protocols for dynamic modeling and RNA sequencing. Table S1  
139 in File S1 lists all *Neurospora* strains. Table S2 in File S1 lists the parameters of the  
140 mathematical model. File S2 contains Table S3 that provides the up-regulated genes in *Δcry*,  
141 *Δvvd*, *Δwc-1* in 5000 lux. File S3 contains Table S4 that lists the KEGG pathway of genes  
142 differentially expressed in *Δcry*, *Δvvd*, *Δwc-1* in 5000 lux light and 1000 lux light. Figure  
143 S1 in File S1 shows the conidiation rhythms of FGSC4200 strain. Figure S2 in File S1  
144 shows the FRQ protein levels under different LD routines. Figure S3 in File S1 provides  
145 the scheme for the mathematical model of *Neurospora* circadian rhythm. Figure S4 in File  
146 S1 shows the impact of light sensors on the adaptation to short LD cycles. Figure S5 in File  
147 S1 shows the conidiation rhythms of *Neurospora* strains in short LD cycles. Figure S6 in  
148 File S1 shows the growth phenotype and conidiation rhythms of indicated strains.

149

## 150 **Results**

### 151 ***The synchronization and resonance of Neurospora rhythms under LD routines***

152 To address how the short LD cycles affect the rhythms, we conducted race tube assays with  
153 the wild-type strain (*301-5, bd*), under the following series of short LD cycling conditions  
154 including LD6:6, LD4:4, LD3:3, LD2:2, LD1:1, LD45min:45min and LD30min:30min,  
155 which consisted of symmetric light and dark phases. Additionally, we tested *Neurospora*  
156 growth in LD65min:25min, an asymmetric condition, to mimic the light/dark condition on  
157 orbital flight. The results show that under LD6:6, LD4:4, LD3:3, LD2:2, the conidiation  
158 displayed overt rhythms with periods that coincided with the LD cycles. However, when the  
159 cycles were shorter, under even shorter cycles, the entrained conidiation rhythms were  
160 abolished (Figure 1A).

161 The arrhythmicity of *Neurospora* under extremely short LD cycles (e.g., LD1:1) could be  
162 explained by two possibilities: 1) the conidiation rhythms were abolished; 2) the bands were

163 too compact and ambiguous to detect. To validate, we used the non-band strain FGSC4200  
164 which grows very fast in race tube. In constant dark FGSC 4200 shows mild conidiation  
165 rhythms (Belden *et al.* 2007), while in LD1:1 it showed weak but recognizable conidiation  
166 rhythms (Figure S1 in File S1). These data suggest that although the free-running circadian  
167 period of *Neurospora* is approximately 22 h, the conidiation rhythm can be induced by  
168 extremely short LD cycles.

169 The circadian clock can adjust to fit with the cycling environment, especially the light.  
170 We compared the growth rate of two *frq* mutants *frq*<sup>2</sup> and *frq*<sup>7</sup>, which possess shorter and  
171 longer free-running periods in constant dark, respectively (Gardner and Feldman 1981). The  
172 race tube assay results reveal that in LD9:9 the growth rate of *frq*<sup>2</sup> was faster while in  
173 LD13.5:13.5 *frq*<sup>7</sup> was faster (Figure 1, B and C), suggesting a resonance of *Neurospora*  
174 circadian period to the environment.

175 However, when we compared the growth rate of the wild-type strain under various LD  
176 cycles, we got unexpected results showing that *Neurospora* grew much faster in constant dark  
177 than that in constant light or most LD conditions. Moreover, the growth rate in shorter LD  
178 cycles was not necessarily slower than LD12:12. For instance, the growth in DD, LD6:6,  
179 LD3:3 and LD1:1 was significantly faster than that in LD12:12. The growth under  
180 LD65min:25min was also significantly faster than LD12:12 (Figure 1D).

181 *Neurospora* microconidia are small uninucleate spores that serve as male gametes or as  
182 asexual reproductive structures (Maheshwari 1999). When we counted the ratio of  
183 microconidia under LD12:12 and short LD cycles, respectively, and the results show that the  
184 ratio of microconidia in LD12:12 was significantly higher than those in other LD conditions  
185 (Figure 1E).

186

### 187 ***Expression of the FRQ protein in different LD cycles***

188 As the circadian clock is involved in controlling the conidiation rhythmicity, we asked  
189 whether the molecular rhythmicity of the FRQ protein is subject to changes in response to the  
190 length of the LD cycles. As one of the core factors in *Neurospora* circadian clock, FRQ acts as  
191 the negative component in the transcription/translational feedback loop (Baker *et al.*, 2012).  
192 The western blotting results show that under LD12:12 and LD6:6, the expression of the FRQ

193 protein and the phosphorylation profile displayed coincident rhythms with the periods of LD  
194 cycles. However, under LD3:3 and shorter cycles, the FRQ levels seemed to free run but we  
195 also observed some saw-tooth shaped fluctuations under LD3:3 (Figure 2, A-F and Figure S2  
196 in File S1).

197 Mathematical modeling suggested that under LD12:12 and LD6:6, the concentration of  
198 FRQ protein matches the LD cycles (Figure 2G and Figure S3 in File S1 and Table S2 in file  
199 S1; supplemental protocol and parameters for modeling in File S1), instead, but under LD2:2  
200 the FRQ levels show a free running pattern with some saw-tooth shaped fluctuations. The  
201 simulation results show that the mRNA levels have a direct response to light, but the protein  
202 curves are smoother, especially for high-frequency light signals. Therefore, the  
203 post-translational regulatory and translocation processes may perform a buffering function or  
204 high-frequency filtering function. Furthermore, the numerical data also predicted that the  
205 direct response of *frq* mRNA to the light stimuli is lower under shorter LD cycles (Figure 2G),  
206 which may be due to the light adaptation module (VVD-WCC loop) and the core negative  
207 feedback loop.

### 208 ***FWO is not required for adaptation of conidiation rhythms to short LD cycles in*** 209 ***high-intensity light***

210 In the *Neurospora* circadian oscillator, WC-1 and WC-2 are the two positive elements in  
211 which WC-1 function as a blue light sensor (He *et al.* 2002). We asked whether WCC proteins  
212 are responsible for conidiation rhythmicity under LD cycles.

213 We grew the *wc-1<sup>RIP</sup>*, *wc-2<sup>KO</sup>* and *wcc<sup>DKO</sup>* and *frq<sup>10</sup>* strains in race tubes under different LD  
214 cycles and observed conidiation rhythms for all of these mutants exhibit conidiation rhythms  
215 under LD12:12, LD6:6, LD3:3 and LD2:2, but not in DD and LD45min:45min (Figure 3). The  
216 strains were exposed to a light intensity of 5000 lux, during the light periods. These data  
217 suggest that under short LD conditions, the conidiation rhythms cycle to the environment  
218 even without a functional circadian clock. We have also shown that in WT, the FRQ protein  
219 oscillation is masked under LD cycles ( $6 \leq T < 24$ ), but free runs when  $T < 6$  (Figure 2 and Figure  
220 S2 in File S1). Taken together, these results suggest that the FWO system is not required for  
221 the conidiation banding rhythms induced by the cycling environment.

### 222 ***Conidiation rhythms of photosensor-related mutants under short LD regimes***



223 First, we investigated the impacts of individual photosensing-associated genes on the  
224 conidiation rhythms under short LD cycles in  $\Delta cry$ ;  $\Delta vvd$ ;  $\Delta phy-1$ ;  $\Delta phy-2$ ;  $\Delta nop-1$  and in  
225  $cog-1$ , a newly identified mutant showing circadian conidiation rhythmicity under constant  
226 light (Nsa *et al.*, 2015). WC-1, VVD and CRY are blue light sensors while PHY-1 and PHY-2  
227 are potential red light receptors (Corrochano 2007; Froehlich *et al.* 2005; Chen *et al.* 2009).  
228 Unexpectedly, all of these strains showed conidiation rhythms with periods in accordance  
229 with the LD cycling periods, under conditions of LD12:12, LD6:6, LD3:3 and LD2:2 (Figure  
230 4, A-D and Figure S4 in File S1). Together with the fact that the  $\Delta wc-1$  strain can be entrained  
231 at LD2:2, these results suggest that either there exists additional photosensor(s), or the lack of  
232 an individual photosensor is not sufficient to abolish the adaptation of conidiation to short LD  
233 cycling cues.

234 With this in mind, we investigated the conidiation rhythms in strains bearing multiple  
235 mutations/deletions of light-sensor or related genes, which included  $\Delta cry$ ,  $\Delta vvd$ ;  $\Delta cry$ ,  $\Delta wc-1$ ;  
236  $\Delta vvd$ ,  $cog-1$ ;  $\Delta wc-1$ ,  $cog-1$ ;  $\Delta vvd$ ,  $\Delta wc-1$ ,  $cog-1$ ;  $\Delta cry$ ,  $\Delta vvd$ ,  $cog-1$ ;  $\Delta cry$ ,  $\Delta vvd$ ,  $\Delta wc-1$ ;  $\Delta cry$ ,  
237  $\Delta wc-1$ ,  $cog-1$  and  $\Delta cry$ ,  $\Delta vvd$ ,  $\Delta wc-1$ ,  $cog-1$ . Unexpectedly again, all of these strains still  
238 showed conidiation rhythms in short LD cycles (Figure 4, E and F).

239 We also observed these strains under ~5000 lux red and blue light. In blue:dark (BD)  
240 cycles, most of the tested strains exhibit conidiation rhythms. In contrast, under red light, all  
241 the examined strains showed no entrained rhythms in LD6:6, LD3:3 and LD2:2 (Figure S5,  
242 A-G in File S1). Red light can also be sensed by some fungi, e.g., *Aspergillus nidulans*,  
243 *Trichoderma atroviride* and *Neurospora*, which is important for the asexual/sexual transition  
244 during development, hyphal growth and DNA stability (Corrochano 2007; Froehlich *et al.*  
245 2005; Chen *et al.* 2009). Therefore, these data suggest that the conidiation rhythmicity is  
246 controlled predominantly by the blue light sensors and not the red light sensors.

247 The temperature increase that accompanied the switch-on of the lighting in the incubator,  
248 which might also have affected the conidiation. To rule out this possibility, we measured  
249 conidiation rhythms under temperature cycles (25.5°C 6h: 24.5°C 6h) as the range of incubator  
250 temperature is  $\sim \pm 0.5^\circ\text{C}$  in our experiments, as previously described (Nsa *et al.* 2015). The  
251 results showed no synchronization in all tested strains (Figure S5H in File S1), demonstrating  
252 this temperature variation is not sufficient for synchronization. Taken together, these results

253 show that all of these tested light sensors and associated factors were not critical for the  
254 conidiation rhythms. Instead, an unidentified blue light photoreceptor might be involved in  
255 controlling the conidiation rhythms.

256 The effects of different photosensing-associated genes on the production of carotenoid in  
257 all of these strains in constant light were also analyzed. As previously has shown, the strains  
258 containing *vvd* mutations, including  $\Delta vvd$ ;  $\Delta vvd$ , *cog-1*;  $\Delta vvd$ ,  $\Delta cry$  and  $\Delta vvd$ ,  $\Delta cry$ , *cog-1*  
259 displayed bright orange color in their mycelia. In contrast, the mycelia color of strains  $\Delta vvd$ ;  
260  $\Delta wc-1$ , *cog-1*;  $\Delta cry$ ,  $\Delta vvd$ ,  $\Delta wc-1$  and  $\Delta vvd$ ,  $\Delta cry$ ,  $\Delta wc-1$ , *cog-1* were not bright orange.  
261 Interestingly, the *fwd-1<sup>RIP</sup>* strain showed bright orange color similar to that of  $\Delta vvd$  (Figure S6  
262 in File S1).

263 In contrast to our results, Nsa *et al* showed that the  $\Delta wc-1$  strain exhibit no obvious  
264 rhythms under a number of T-cycling conditions including LD6:6, LD9:9, LD12:12 and  
265 LD14:14 (Nsa *et al.* 2015). However, we used a white light intensity (~5000 lux) that was  
266 much higher than that used by Nsa et al (1200 lux), which may account for the inconsistency.  
267 In support of this view, when we grew the clock mutants in LD conditions and the light  
268 intensity was approximately 1000 lux, and conidiation rhythmicity was abolished at the tested  
269 LD conditions (Figure 5, A and B and Figure S5 in File S1 and Figure S6 in File S1).  
270 Conversely, the conidiation rhythms in clock gene mutants, *wc-1<sup>RIP</sup>*, *wcc<sup>DKO</sup>*, *frq<sup>10</sup>* and  $\Delta wc-2$ ,  
271 were present in 5000 lux blue light but were absent in 1000 lux (Figure S6 in File S1). These  
272 data suggest that while clock components might act to promote the function of a potential  
273 photoreceptor to elicit conidiation rhythms, the response of clock mutants to a high-intensity  
274 but not low-intensity light, suggests that higher-intensity light might overcome the repression  
275 effect caused by the loss of clock components (Figure 5, C-E).

276 It is intriguing to note that in BD cycles (blue light: 1000 lux), the strains *cog-1*;  $\Delta wc-1$ ,  
277 *cog-1* and  $\Delta vvd$ ,  $\Delta wc-1$ , *cog-1* exhibited bimodal patterns on the first day (Figure S5F in File  
278 S1), suggesting that the CDO pathway might play a role in mediating the synchronization of  
279 conidiation rhythmicity (Figure S5 in File S1).

### 280 **Implication of FWD-1 in regulating the conidiation rhythms under short LD** 281 **cycles**

282 To probe the possible mechanisms regulating the adaptation to LD cycles, we also checked

283 the conidiation rhythms of several random mutants, among them the *fwd-1<sup>RIP</sup>* strain that lacks  
284 the functional *fwd-1* gene which encodes FWD-1, the Neurospora homolog of *Drosophila*  
285 Slimb, a ubiquitin E3 ligase. Neurospora FWD-1 has been implicated in the regulation of  
286 FRQ ubiquitination and turn over (He *et al.* 2003; Larrondo *et al.* 2015).

287 The *fwd-1<sup>RIP</sup>* strain exhibited no overt conidiation bands under LD3:3 and shorter LD  
288 cycles (Figure 4 and Figure 5 and Figure S5 in File S1). The mutants lacking tested  
289 photosensors showed normal responses to short LD cycles, suggesting that the phenotype of  
290 *fwd-1<sup>RIP</sup>* is not based on the impacts of FWD-1 on these genes, i.e., additional photosensor(s)  
291 controlled by FWD-1 might be implicated in regulating the conidiation rhythms under short  
292 LD cycles. Alternatively, a potential factor connecting the specific photosensor to conidiation  
293 and, that is controlled by FWD-1, might be implicated (Figure 5, C and D).

#### 294 **Transcriptomic analysis of genes induced by high-intensity light**

295 The above data suggest that high-intensity light influences conidiation rhythms, thus we  
296 conducted RNA-seq analysis to assess the changes of gene expression in response to  
297 high-intensity light.

298 We compared the transcriptomic changes of the strain  $\Delta cry$ ,  $\Delta vvd$ ,  $\Delta wc-1$ , which contains  
299 no known blue light photoreceptors, after exposure for 45min to either 1000 lux or 5000 lux  
300 white light (Fig. 6A). The results showed that upon light exposure, a variety of genes involved  
301 in metabolism and gene expression were up-regulated (folds  $\geq 1.5$ ). For the genes exclusively  
302 induced by 5000-lux light, one putative motif (GAXGA) was identified by the XXmotif  
303 online tool (<http://xxmotif.genzentrum.lmu.de/>), which is present in 56 promoter areas of the  
304 73 genes (Figure 6C). Light of 5000-lux induced the exclusive expression of 73 specific genes,  
305 many of which were enriched in fatty acid metabolism, ribosome biogenesis, etc. (Figure 6, C  
306 and D and Table S3 in File S2 and S4 in File S3). The induced expression of three  
307 representative genes (NCU00298, NCU00992 and NCU09771) were confirmed in  $\Delta cry$ ,  $\Delta vvd$ ,  
308  $\Delta wc-1$ ;  $\Delta phy-1$ ,  $\Delta phy-2$  and  $\Delta nop-1$  by qRT-PCR (Figure 6, E-G). Although the pathways of  
309 ribosome biogenesis and propanoate metabolism were induced in both 1000-lux and 5000-lux  
310 light (Table S4 in File S3), the genes involved were different, suggesting that higher-intensity  
311 light plays specific roles in regulating the expression certain genes and metabolism.

312 Taken together, these data confirm that high-intensity light induces the expression of a

313 set of genes in clock mutants that might represent the targets for studying the potential  
314 unidentified photoreceptor(s).

315

## 316 Discussion

317 Within a certain range, the cyclical environmental changes ( $T$ -cycles) can induce a rhythm  
318 with the same periodicity as the environment even when these are non-24-h cycles, which  
319 means  $T$ -cycles mask the endogenous circadian periodicity. This range varies in different  
320 organisms (Jud *et al.* 2005; Aschoff 1960). In *Neurospora*, we show that under a number of  
321 short LD conditions, including even very short cycles, such as LD1:1, induce conidiation  
322 banding rhythms with periods that change along with the environmental periods. Under  
323 constant darkness, *Neurospora* conidiation rhythms display an ~22 h period which reflects the  
324 endogenous circadian period. Our study shows that under almost all of the short LD cycles,  
325 the conidiation rhythms were induced by the  $T$ -cycles. The conidiation rhythms under short  
326  $T$ -cycles are not endogenous as they disappeared in constant dark; instead, they are the  
327 hourglass-type rhythms.

328 FRQ is one of the central circadian clock components and the rhythmic changes in FRQ  
329 levels and phosphorylation patterns represent the endogenous circadian rhythms (Baker *et al.*  
330 2012). When we further looked at the expression of the core circadian protein FRQ under  
331 short LD cycles, we found that similar to the conidiation rhythms, the period of FRQ changed  
332 in accordance to the LD cycles when  $T > LD3:3$ . In contrast, under LD cycles with  $T \leq LD3:3$ ,  
333 FRQ level no longer oscillated with the  $T$  cycles, and instead exhibit periods close to 24h, i.e.,  
334 the masking effects faded while the FRQ rhythm free ran. The inconsistency between  
335 conidiation rhythms and FRQ rhythms might reflect the decoupling between the intrinsic and  
336 extrinsic rhythms under the extremely short LD cycles. The dynamic modeling results showed  
337 the superimposition of endogenous and the light-induced rhythms, which can also be  
338 observed in the western blot results of FRQ protein under very short LD cycles ( $T \leq LD3:3$ )  
339 (Figure 2 and Figure S2 in File S1).

340 In many species, it has been demonstrated that non-24h  $T$ -cycles decrease their fitness  
341 (Hut *et al.*, 2011), suggesting the adaptation of the endogenous rhythm of an organism to

342 external cycling cues is critical for the development and growth. We show that the growth rate  
343 of *Neurospora* was slower under LD12:12 compared to many other conditions. However, the  
344 proportion of microconidia produced in LD12:12 prevailed over those in other conditions.

345 Faster growth of an organism does not necessarily mean optimal fitness to the  
346 environment (Hut *et al.* 2011). Instead, the capability to produce variable and fertile progenies  
347 may be more crucial. *Neurospora* microconidia function predominantly as spermatid  
348 (Maheshwari 1999), suggesting that the LD12:12 condition might be optimal for sexual  
349 reproduction. It is likely that in nature, the circadian clock renders *Neurospora* better prepared  
350 to use its sexual reproduction strategies to cope with constantly changing environmental  
351 stresses. Compared to the findings in some other organisms, these results reflect that different  
352 organisms may employ different strategies for adaptation and propagation (Vaze and Sharma  
353 2013). In addition, the dramatic differences in growth under LL vs DD, LD45min:45min vs  
354 LD65min:25min indicate that the growth is influenced by the daily length of lighting in  
355 *Neurospora*, which might be similar to the seasonal physiology responses in different  
356 kingdoms (Arendt 1988; Tan *et al.* 2004).

357 In fungi, a number of developmental and physiological processes are affected by light  
358 (Lauter 1996; Linden *et al.* 1997). In *Neurospora*, the most prominent light response is the  
359 light-regulated biosynthesis of the photo protective mycelia carotenoids (Schrott 1980;  
360 Harding and Turner 1981), phototropism of perithecial beaks, protoperithecia development,  
361 promotion of conidia, light entrainment of the circadian clock and the formation of spores and  
362 phototropism (Lauter *et al.* 1997; Ballario *et al.* 1996). Almost all *Neurospora* light responses  
363 described so far are only known to be triggered by blue light. Transcriptomic analysis showed  
364 that expression of some genes can be triggered by light in the *wc-1* null strain, suggesting the  
365 existence of additional photoreceptors (Chen *et al.* 2009). Surprisingly, we show that upon  
366 removal of several photosensors, the conidiation rhythms still exist in short LD cycles. In  
367 addition, the strains bearing *cog-1* mutation can still be entrained (Figure 3 and Figure 4 and  
368 Figure S4 and Figure S5 in File S1). Together with the results of *cog-1* in BD3:3 (Figure S5F  
369 in File S1), these data suggest that the conidiation rhythms in short LD cycles are independent  
370 of either FWO or CDO although the CDO system affects the conidiation rhythms in short LD  
371 cycles.

372 In *Neurospora*, in addition to WC-1, there are several additional confirmed or putative  
373 photoreceptors in *Neurospora* including VVD, CRY, PHY1/2 and NOP-1 (Chen *et al.* 2009;  
374 Chen *et al.* 2010a; Chen and Loros 2009). VVD is a small LOV domain-containing blue-light  
375 photoreceptor protein that affects photo adaptation for many light-responsive genes  
376 (Zoltowski *et al.* 2007; Schwerdtfeger and Linden 2003). As has been known, some light  
377 sensors can regulate other light sensors at transcriptional or post-transcriptional levels. For  
378 instance, in the light, WCC regulates the expression of VVD in *Neurospora*. Conversely, VVD  
379 inhibits WCC in a light-dependent fashion though it is not essential for clock function.  
380 Furthermore, VVD has been shown to physically interact with WCC (Zoltowski *et al.* 2007;  
381 Chen *et al.* 2010a; Malzahn *et al.* 2010; Gin *et al.* 2013; Shrode *et al.* 2001). Cryptochrome is  
382 a putative blue light sensor and its function remains elusive (Froehlich *et al.* 2005; Chen *et al.*  
383 2009). PHY1/2 are putative red light receptors and NOP-1 is a putative green light receptor  
384 (Chen *et al.* 2010b).

385 It has been claimed that WCC and VVD are responsible for most light-dependent  
386 physiological processes, if not all. However, the clock mutants showed synchronization to  
387 5000 lux white light but not 1000 lux white light (Nsa *et al.* 2015) (Figure 3 and Figure 5).  
388 Moreover, the conidiation rhythmicity only occurs in blue light but not red light (Figure S5 in  
389 File S1).

390 Collectively, these data suggest the presence of an unidentified blue photoreceptor which  
391 induces conidiation rhythmicity. Interestingly, the synchronization of conidiation rhythms is  
392 independent of the FWO system; instead, the circadian clock might promote the conidiation  
393 responses (Figure 5, C and D).

394 Under 1000 lux white light, clock mutants displayed no conidiation rhythms,  
395 suggesting that the circadian clock functions to maintain or promote conidiation responses  
396 to short LD cycles. These data also suggest that the circadian clock might help *Neurospora*  
397 to promptly adjust its conidiation according to changeable light condition in the natural  
398 environment; for instance, caused by cloud movement or shadows being cast in the daytime.  
399 Under high-intensity light, even the clock mutants showed conidiation rhythms, suggesting  
400 the unidentified photoreceptor(s) might only sense very strong light, which can confer the  
401 condition rhythmicity in clock mutants.

402 Light initiates adaptation in a comprehensive set of metabolic pathways (Tisch and  
403 Schmoll 2010). In this work, we found that a subset of metabolic pathways was affected  
404 upon higher light exposure relative to lower light, suggesting that additional  
405 photoreceptor(s) than those that are known (e.g., WC-1, VVD and CRY) play a role in  
406 regulating light-induced metabolic adaptation.

407 FWD-1 is another regulator of conidiation rhythms in short LD cycles. In LD cycles  
408 ( $6h \leq T < 12h$ ), the depletion of FWD-1 showed no overt impacts on conidiation rhythms,  
409 suggesting that FWD-1 does not affect the NFLO pathways. However, in shorter LD cycles  
410 ( $T < 6h$ ), the depletion of FWD-1 caused abolishment of conidiation rhythmicity, suggesting  
411 that FWD-1 controls NFLO pathways under such conditions. FWD-1 might function to  
412 affect the responsible photoreceptor(s) or sensitize transducers that couple specific light  
413 sensors and conidiation. Therefore, a lack of FWD-1 leads to abolishment of conidiation  
414 rhythms responding to the very short LD cycles.

415 The light conditions in certain extreme environments, e.g., space, dramatically differ  
416 from that on Earth. In low orbit, the LD cycles are very short (90-120-minute) with only 30%  
417 of the time in light and the remainder of the time in the dark (Stampi 1994). The present data  
418 also demonstrate that the circadian rhythms and fitness is impaired in simulated LD cycles  
419 with a 90-min period (Figure 1).

420

#### 421 **Acknowledgements**

422 We thank Prof. Deborah Bell-Pedersen (Texas A&M University, College Station, Texas, USA),  
423 Prof. Jay C. Dunlap (Geisel School of Medicine at Dartmouth). We thank Prof. Deborah  
424 Bell-Pedersen and Prof. Shaojie Li (Institute of Microbiology, CAS, China) for inspiring  
425 discussion and suggestions. This work was supported by the National 973 Program of China  
426 (Nos.2011CB711000 and 2012CB947600), National Natural Science Foundation of China  
427 (Nos. 31571205 and 31171119).

428

#### 429 **Literature cited**

430 Abraham, U., A. E. Granada, P. O. Westermark, M. Heine, A. Kramer *et al.*, 2010 Coupling governs  
431 entrainment range of circadian clocks. *Mol. Syst. Biol.* 6: 438.  
432 Arendt, J., 1998 Melatonin and the pineal gland: influence on mammalian seasonal and circadian

- 433 physiology. *Rev. Reprod.* 3: 13-22.
- 434 Aronson, B.D., K. A. Johnson, J. J. Loros, and J. C. Dunlap, 1994 Negative feedback defining a circadian  
435 clock: autoregulation of the clock gene frequency. *Science* 263: 1578-1584.
- 436 Aschoff, J., 1960 Exogenous and endogenous components in circadian rhythms. *Cold Spring Harb. Symp.*  
437 *Quant. Biol.* 25: 11-28.
- 438 Baker, C.L., J. J. Loros, and J. C. Dunlap, 2012 The circadian clock of *Neurospora crassa*. *Fems. Microbiol.*  
439 *Rev.* 36: 95-110.
- 440 Ballario, P., P. Vittorioso, A. Magrelli, C. Talora, and A. Cabibbo *et al.*, 1996 White collar-1, a central  
441 regulator of blue light responses in *Neurospora*, is a zinc finger protein. *EMBO J.* 15: 1650-1657.
- 442 Belden, W.J., L. F. Larrondo, A. C. Froehlich, M. Shi, C. Chen *et al.*, 2007 The band mutation in  
443 *Neurospora crassa* is a dominant allele of *ras-1* implicating RAS signaling in circadian output. *Genes*  
444 *Dev.* 21: 1494-1505.
- 445 Bell-Pedersen, D., V. M. Cassone, D. J. Earnest, S. S. Golden, P. E. Hardin *et al.*, 2005 Circadian rhythms  
446 from multiple oscillators: Lessons from diverse organisms. *Nat. Rev. Genet.* 6: 544-556.
- 447 Binkley, S. A., 1990 *The clockwork sparrow : time, clocks, and calendars in biological organisms.*  
448 Prentice-Hall, Inc., New Jersey.
- 449 Boulos, Z., M. M. Macchi, and M. Terman, 2002 Twilights widen the range of photic entrainment in  
450 hamsters. *J. Biol. Rhythms* 17: 353-363.
- 451 Chen, C., and J. J. Loros, 2009 *Neurospora* sees the light: light signaling components in a model system.  
452 *Commun Integr Biol* 2:448-451.
- 453 Chen, C., B. S. Demay, A. S. Gladfelter, J. C. Dunlap, and J. J. Loros, 2010 Physical interaction between  
454 VIVID and white collar complex regulates photoadaptation in *Neurospora*. *Proc. Natl. Acad. Sci. USA*  
455 107: 16715-16720. a
- 456 Chen, C., J. C. Dunlap, and J. J. Loros, 2010 *Neurospora* illuminates fungal photoreception. *Fungal Genet.*  
457 *Biol.* 47: 922-929. b
- 458 Chen, C., C. S. Ringelberg, R. H. Gross, J. C. Dunlap, and J. J. Loros, 2009 Genome-wide analysis of  
459 light-inducible responses reveals hierarchical light signalling in *Neurospora*. *EMBO J.* 28: 1029-1042.
- 460 Corrochano, L. M., 2007 Fungal photoreceptors: sensory molecules for fungal development and behaviour.  
461 *Photochem. Photobiol. Sci.* 6: 725-736.
- 462 Czeisler, C.A., J. F. Duffy, T. L. Shanahan, E. N. Brown, J. F. Mitchell *et al.*, 1999 Stability, precision, and  
463 near-24-hour period of the human circadian pacemaker. *Science* 284: 2177-2181.
- 464 Dong, W., X. Tang, Y. Yu, R. Nilsen, R. Kim *et al.*, 2008 Systems biology of the clock in *Neurospora crassa*.  
465 *Plos One* 3: e3105.
- 466 Dunlap, J. C., J. J. Loros, J.J., and P. J. DeCoursey, 2004 *Chronobiology: biological timekeeping.* Sinauer  
467 Associates. Inc. Publishers.
- 468 Froehlich, A. C., Y. Liu, J. J. Loros, and J. C. Dunlap, 2002 White Collar-1, a circadian blue light  
469 photoreceptor, binding to the frequency promoter. *Science* 297: 815-819.
- 470 Froehlich, A.C., B. Noh, R. D. Vierstra, J. J. Loros, and J. C. Dunlap, 2005 Genetic and Molecular Analysis  
471 of Phytochromes from the Filamentous Fungus *Neurospora crassa*. *Eukaryot. Cell* 4: 2140-2152.
- 472 Gardner, G. F., and J. F. Feldman, 1981 Temperature compensation of circadian period length in clock  
473 mutants of *Neurospora crassa*. *Plant Physiol.* 68: 1244-1248.
- 474 Gin, E., A. C. Diernfellner, M. Brunner, and T. Höfer, 2013 The *Neurospora* photoreceptor VIVID exerts  
475 negative and positive control on light sensing to achieve adaptation. *Mol. Syst. Biol.* 9: 667.
- 476 Görl, M., M. Merrow, B. Huttner, J. Johnson, T. Roenneberg *et al.*, 2001 A PEST-like element in



477 FREQUENCY determines the length of the circadian period in *Neurospora crassa*. *EMBO J.* 20:  
478 7074-7084.

479 Guo, J., G. Huang, J. Cha, and Y. Liu, 2010 Biochemical methods used to study the gene expression and  
480 protein complexes in the filamentous fungus *Neurospora crassa*. *Methods Mol. Biol.* 638: 189-200.

481 Harding, R. W., and R. V. Turner, 1981 Photoregulation of the carotenoid biosynthetic pathway in albino  
482 and white collar mutants of *Neurospora crassa*. *Plant Physiol.* 68: 745-749.

483 He, Q., P. Cheng, Y. Yang, Q. He, H. Yu *et al.*, 2003 FWD1-mediated degradation of FREQUENCY in  
484 *Neurospora* establishes a conserved mechanism for circadian clock regulation. *EMBO J.* 22: 4421-4430.

485 He, Q., P. Cheng, Y. Yang, L. Wang, and K. H. Gardner *et al.*, 2002 White collar-1, a DNA binding  
486 transcription factor and a light sensor. *Science* 297: 840-843.

487 Heintzen, C., J. J. Loros, and J. C. Dunlap, 2001 The PAS protein VIVID defines a clock-associated  
488 feedback loop that represses light input, modulates gating, and regulates clock resetting. *Cell* 104:  
489 453-464.

490 Highkin, H.R., and J. B. Hanson, 1954 Possible interaction between light-dark cycles and endogenous daily  
491 rhythms on the growth of tomato plants. *Plant Physiol.* 29: 301-302.

492 Hurley, J. M., J. J. Loros, and J. C. Dunlap, 2015 Dissecting the mechanisms of the clock in *Neurospora*.  
493 *Methods Enzymol.* 551: 29-52.

494 Hut, R. A., and D. G. Beersma, 2011 Evolution of time-keeping mechanisms: early emergence and  
495 adaptation to photoperiod. *Philos. Trans. R. Soc. Lond. B Biol. Sci.* 366: 2141-2154.

496 Jewett, M. E., R. E. Kronauer, and C. A. Czeisler, 1994 Phase-amplitude resetting of the human circadian  
497 pacemaker via bright light: a further analysis. *J. Biol. Rhythms* 9: 295-314.

498 Jud, C., I. Schmutz, G. Hampp, H. Oster, and U. Albrecht, 2005 A guideline for analyzing circadian  
499 wheel-running behavior in rodents under different lighting conditions. *Biol. Proced. Online* 7: 101-116.

500 Larrondo, L.F., C. Olivaresyanez, C. L. Baker, J. J. Loros, and J. C. Dunlap, 2015 Decoupling circadian  
501 clock protein turnover from circadian period determination. *Science* 347: 1257277.

502 Lauter, F., 1996 Molecular genetics of fungal photobiology. *J. Genet.* 75: 375-386.

503 Lauter, F., C. T. Yamashiro, and C. Yanofsky, 1997 Light stimulation of conidiation in *Neurospora crassa*:  
504 studies with the wild-type strain and mutants *wc-1*, *wc-2* and *acon-2*. *J. Photochem. Photobiol. B* 37:  
505 203-211.

506 Lewis, P. R., and M. C. Lobban, 1957 Dissociation of diurnal rhythms in human subjects living on  
507 abnormal time routines. *Exp. Physiol.* 42: 371-386.

508 Linden, H., M. Rodriguez-Franco, and G. Macino, 1997 Mutants of *Neurospora crassa* defective in  
509 regulation of blue light perception. *Mol. Gen. Genet.* 254: 111-118.

510 Madrid, J., F. Sanchez-Vazquez, P. Lax, P. Matas, E. Cuenca *et al.*, 1998 Feeding behavior and entrainment  
511 limits in the circadian system of the rat. *Am. J. Physiol.* 275: R372-R383.

512 Maheshwari, R., 1999 Microconidia of *Neurospora crassa*. *Fungal Genet. Biol.* 26: 1-18.

513 Malzahn, E., S. Ciprianidis, K. Káldi, T. Schafmeier, and M. Brunner, 2010 Photoadaptation in *Neurospora*  
514 by competitive interaction of activating and inhibitory LOV domains. *Cell* 142: 762-772.

515 Nsa, I. Y., N. Karunarathna, X. Liu, H. Huang, B. Boettger, *et al.*, 2015 A novel cryptochrome-dependent  
516 oscillator in *Neurospora crassa*. *Genetics* 199: 233-245.

517 Ouyang, Y., C. R. Andersson, T. Kondo, S. S. Golden, and C. H. Johnson, 1998 Resonating circadian clocks  
518 enhance fitness in cyanobacteria. *Proc. Natl. Acad. Sci. USA* 95: 8660-8664.

519 Ralph, M. R., and M. Menaker, 1988 A mutation of the circadian system in golden hamsters. *Science* 241:  
520 1225-1227.

- 521 Refinetti R., 2004 Parameters of photic resetting of the circadian system of a diurnal rodent, the Nile grass  
522 rat. *Acta. Sci. Vet.* 32: 1-6.
- 523 Schwerdtfeger, C., and H. Linden, 2001 Blue light adaptation and desensitization of light signal  
524 transduction in *Neurospora crassa*. *Mol. Microbiol.* 39: 1080-1087.
- 525 Shrode, L. B., Z. A. Lewis, L. D. White, D. Bellpedersen, and D. J. Ebbole, 2001 *vvd* is required for light  
526 adaptation of conidiation-specific genes of *Neurospora crassa*, but not circadian conidiation. *Fungal*  
527 *Genet. Biol.* 32: 169-181.
- 528 Schrott, E. L., 1980 Fluence response relationship of carotenogenesis in *Neurospora crassa*. *Planta* 150:  
529 174-179.
- 530 Schwerdtfeger, C., and H. Linden, 2003 VIVID is a flavoprotein and serves as a fungal blue light  
531 photoreceptor for photoadaptation. *EMBO J.* 22: 4846-4855.
- 532 Stampi, C., 1994 Sleep and circadian rhythms in space. *J. Clin. Pharmacol.* 34: 518-534.
- 533 Tan, Y., M. Merrow, and T. Roenneberg, 2004 Photoperiodism in *Neurospora crassa*. *J. Biol. Rhythms* 19:  
534 135-143.
- 535 Tisch, D., and M. Schmoll, 2010 Light regulation of metabolic pathways in fungi. *Appl. Microbiol.*  
536 *Biotechnol.* 85:1259-1277.
- 537 Vaze, K.M., and V. K. Sharma, 2013 On the adaptive significance of circadian clocks for their owners.  
538 *Chronobiol. Int.* 30: 413-433.
- 539 Zoltowski, B.D., C. Schwerdtfeger, J. Widom, J. J. Loros, A. M. Bilwes *et al.*, 2007 Conformational  
540 switching in the fungal light sensor Vivid. *Science* 316: 1054-1057.
- 541
- 542

543 FIG 1

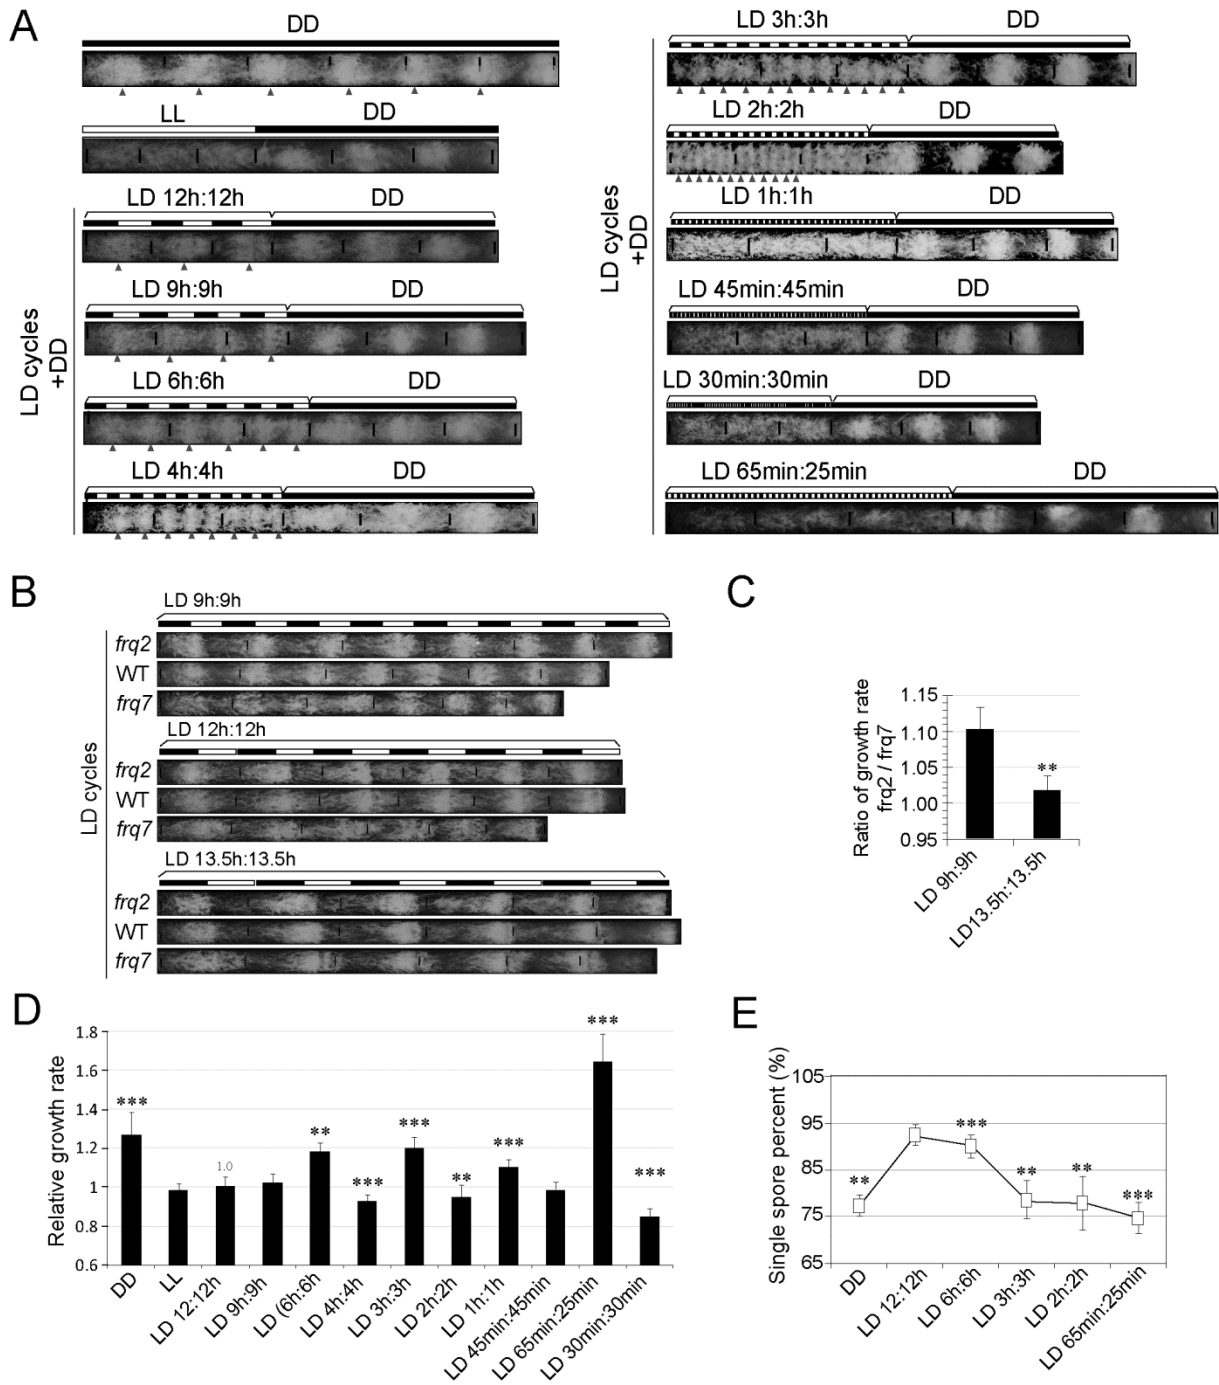

544

545 **Figure 1** Conidiation rhythms, growth and adaptation of *Neurospora* in short LD cycles. A.  
 546 Conidiation rhythms of *Neurospora* under a series of LD cycles. The black and white bars  
 547 denote different LD regimes. Triangles denote the conidiation bands. B. Growth rate of  
 548 *Neurospora* under a series of LD cycles. Data are mean  $\pm$  SD, n=3. Represent results (n $\geq$ 3)  
 549 are shown. C. Ratio of the growth rates between *frq2* and *frq7*. Data are mean  $\pm$  SD, n=3. D.  
 550 Growth rates of indicated strains. The growth in LD12:12 was normalized to 1.0. Data are mean  
 551  $\pm$  SE, n=3. E. Proportion of microconidia produced under different LD cycles. Data are mean  $\pm$   
 552 SE, n=3. The light intensity was 5000 lux.

553

554 FIG 2

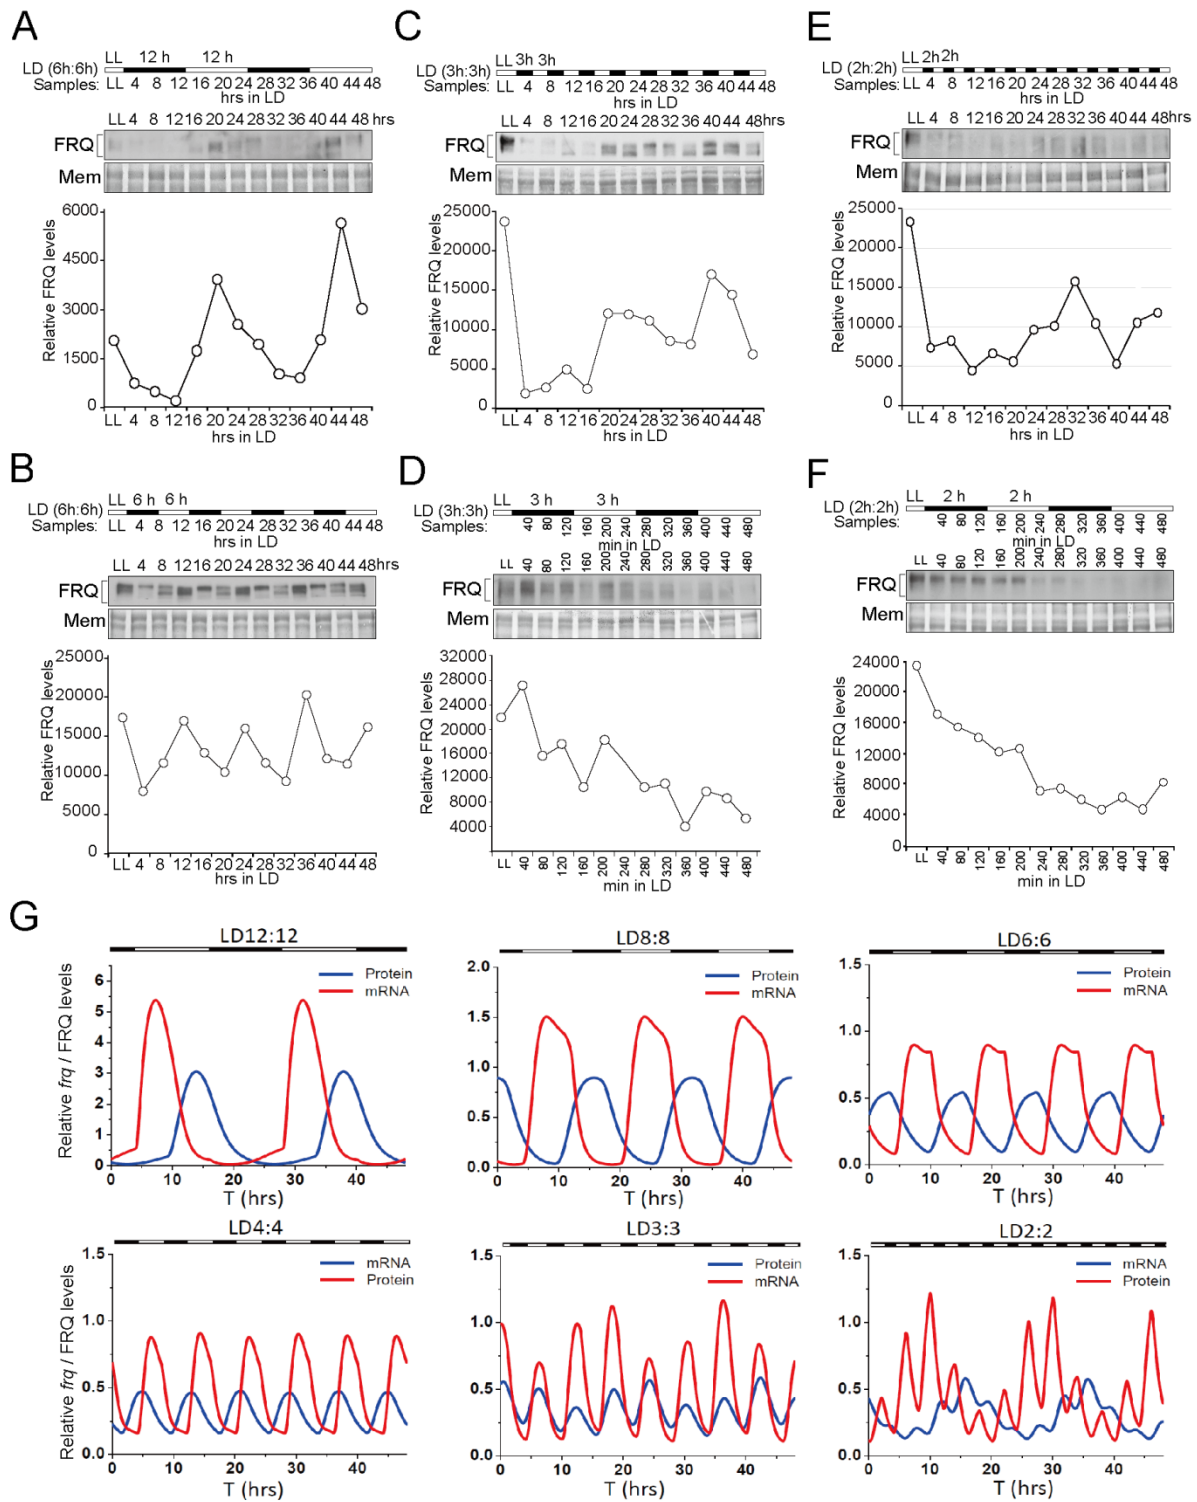

555

556 **Figure 2** The FRQ protein levels under different LD routines. The FRQ protein levels are shown  
 557 by western blot analysis. The LD routines are LD12:12 for two cycles (A), LD6:6 for 48 h (B),  
 558 LD3:3 for 48 h (C), LD3:3 for two cycles (D), LD2:2 for 48 h (E) and LD2:2 for two cycles (F),  
 559 respectively. The black and white bars denote different LD regimes. Membranes (Mem) stained  
 560 with Amido Black were used as loading control. The densitometric analysis of FRQ levels is  
 561 shown at the bottom of each panel. Representative data of triplicates are shown. See more

562 data in Fig. S1. The light intensity was 5000 lux. (G) Dynamic modeling results showing the time  
563 series of *frq* mRNA and FRQ protein under different light-dark cycles. Both the *frq* mRNA and  
564 FRQ protein can be entrained to 12:12 LD cycles, 8:8 LD cycles, 6:6 LD cycles and 4:4 LD  
565 cycles. As the frequency of the light signal increases to 3:3 cycles, the *frq* mRNA and FRQ  
566 protein still exhibit the oscillation with a period of approximately 6h. If the frequency of the light  
567 signal is further increased to 2:2 cycles, although the *frq* mRNA can respond to the induction by  
568 the light, the FRQ levels show the free running pattern with some fluctuations.  
569

570 FIG 3

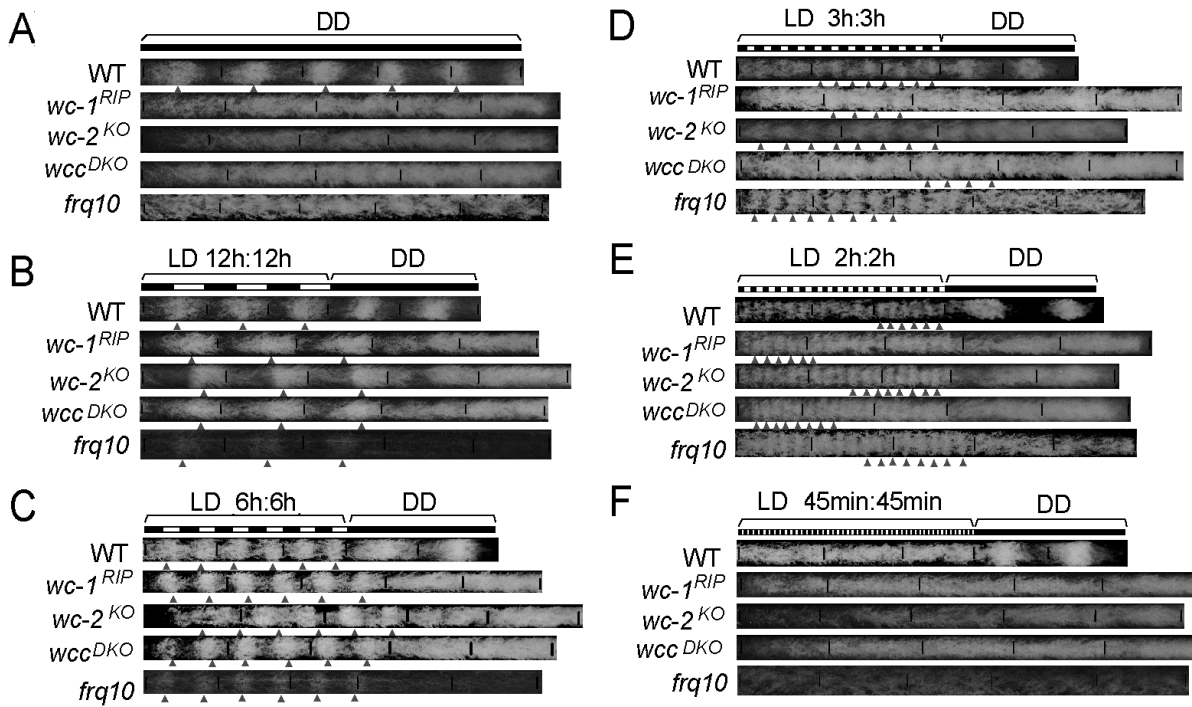

571  
572

573 **Figure 3** The conidiation rhythms of *Neurospora* strains in short LD cycles. The conditions were  
574 DD (A), LD12:12 (B), LD6:6 (C), LD3:3 (D), LD2:2 (E) and LD45min:45min (F). Represent  
575 results (n≥3) are shown. Triangles denote the conidiation bands. The strains were grown under  
576 white light and the light intensity was 5000 lux.

577  
578

579 FIG4.

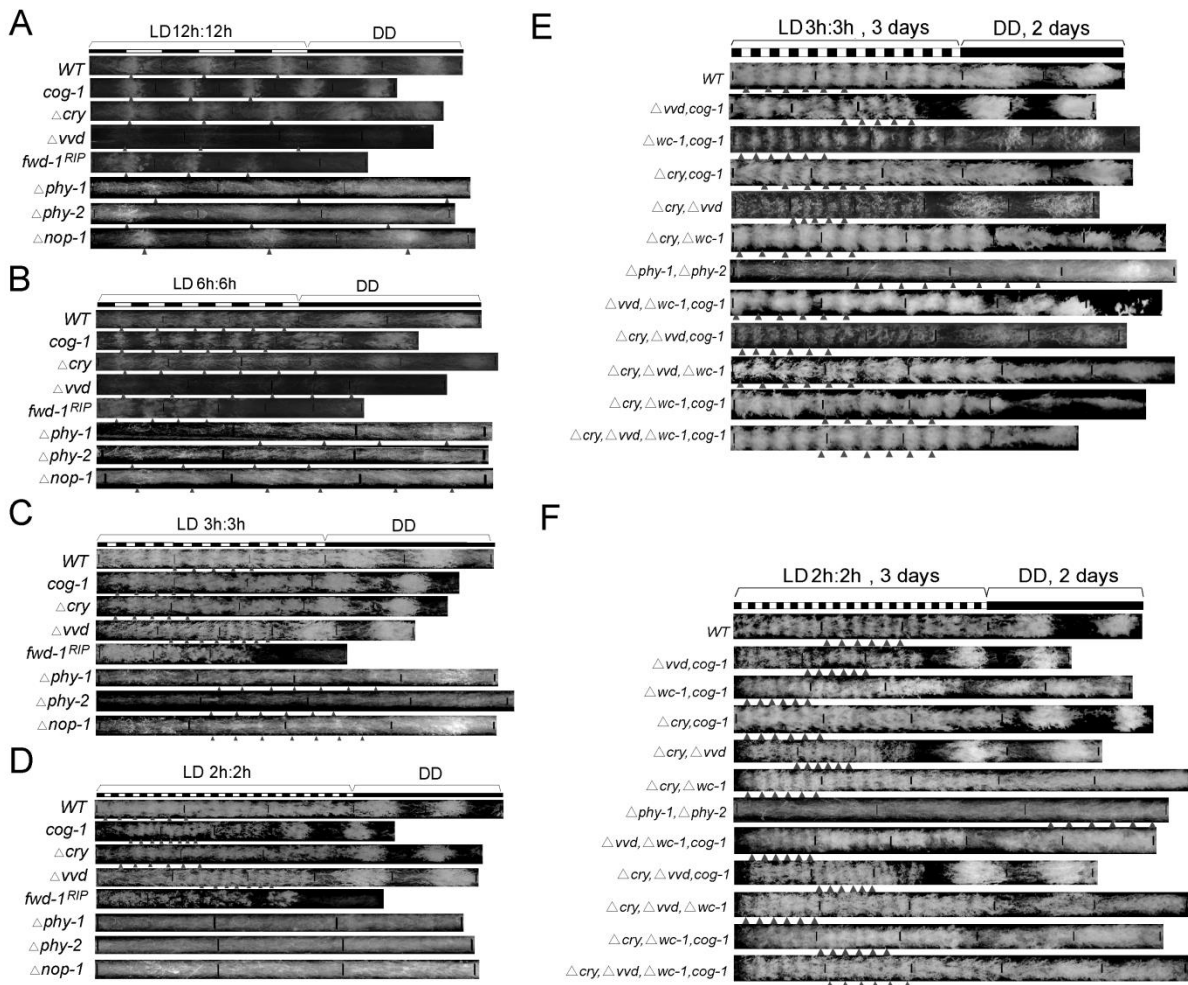

580

581 **Figure 4.** Impact of light sensors on the adaptation to short LD cycles. Race tube results of  
582 indicated strains under indicated LD cycles. Represent results (n $\geq$ 3) are shown. Triangles  
583 denote the conidiation bands. The strains were grown under white light and the light intensity  
584 was 5000 lux.

585

586

587 FIG5

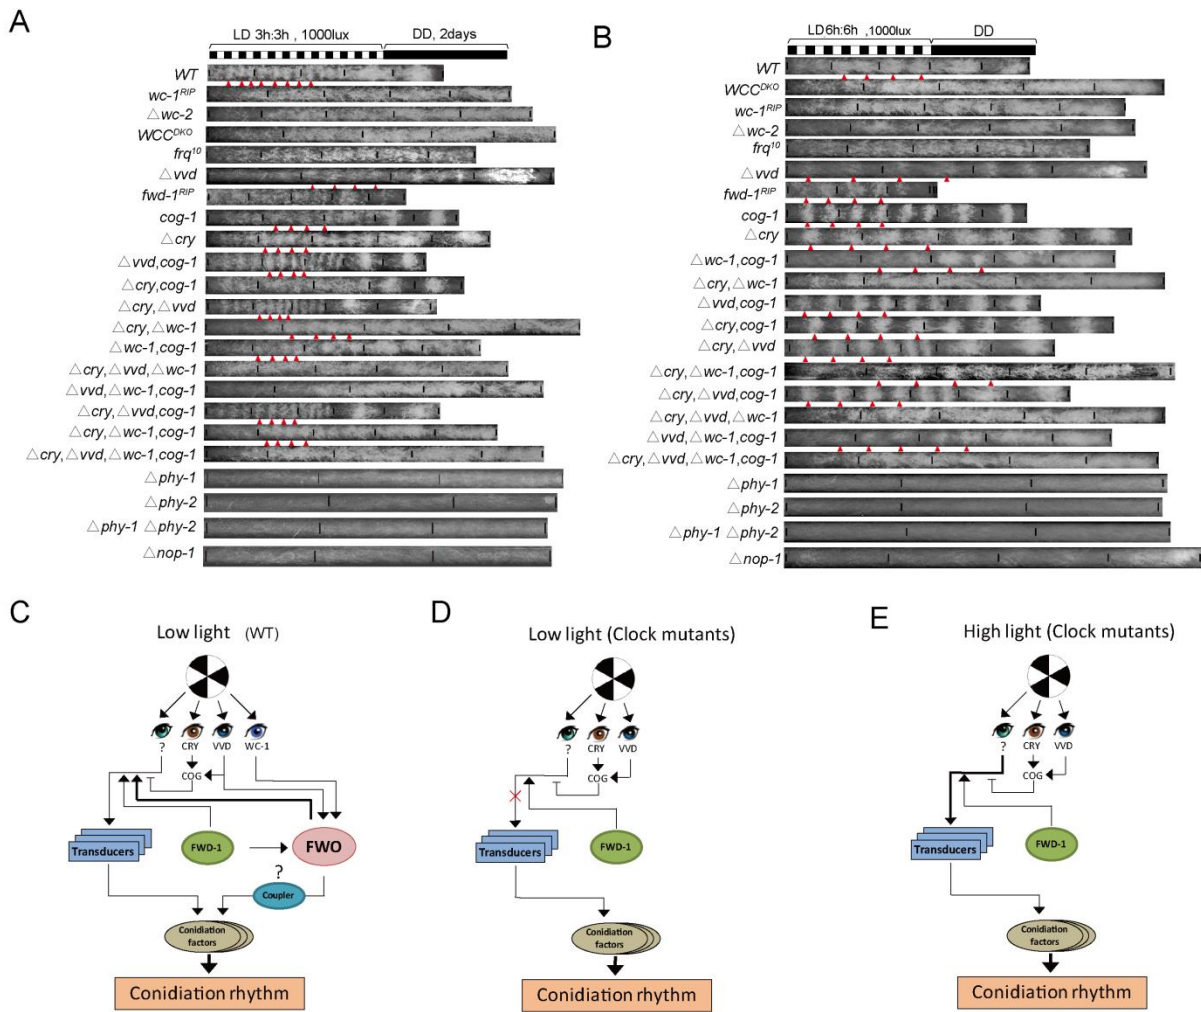

588

589

590 **Figure 5.** Conidiation rhythms in low white light (1000 lux). A/B. Race tube results of conidiation  
 591 rhythms of indicated strains in LD3:3 (A) and LD6:6 (B). The white light intensity was 1000 lux.  
 592 Triangles denote the conidiation bands. C-E. Schematics of the control of conidiation rhythms  
 593 under short LD cycles of WT in low-intensity light (C) and clock mutants in low-intensity light (D)  
 594 and high-intensity light (E). WC-1, VVD and additional photoreceptor(s) are implicated in the  
 595 regulation of the conidiation rhythms. In  $6 \text{ h} \leq T \leq 24 \text{ h}$ , the FWO system is entrained, and the  
 596 FRQ rhythms are not endogenous as they cannot be maintained in constant dark. The question  
 597 marks denote unidentified photoreceptor and putative coupler linking FWO and conidiation,  
 598 respectively. Transducers denote the factors linking photoreceptor and conidiation.

599

600



601 FIG 6

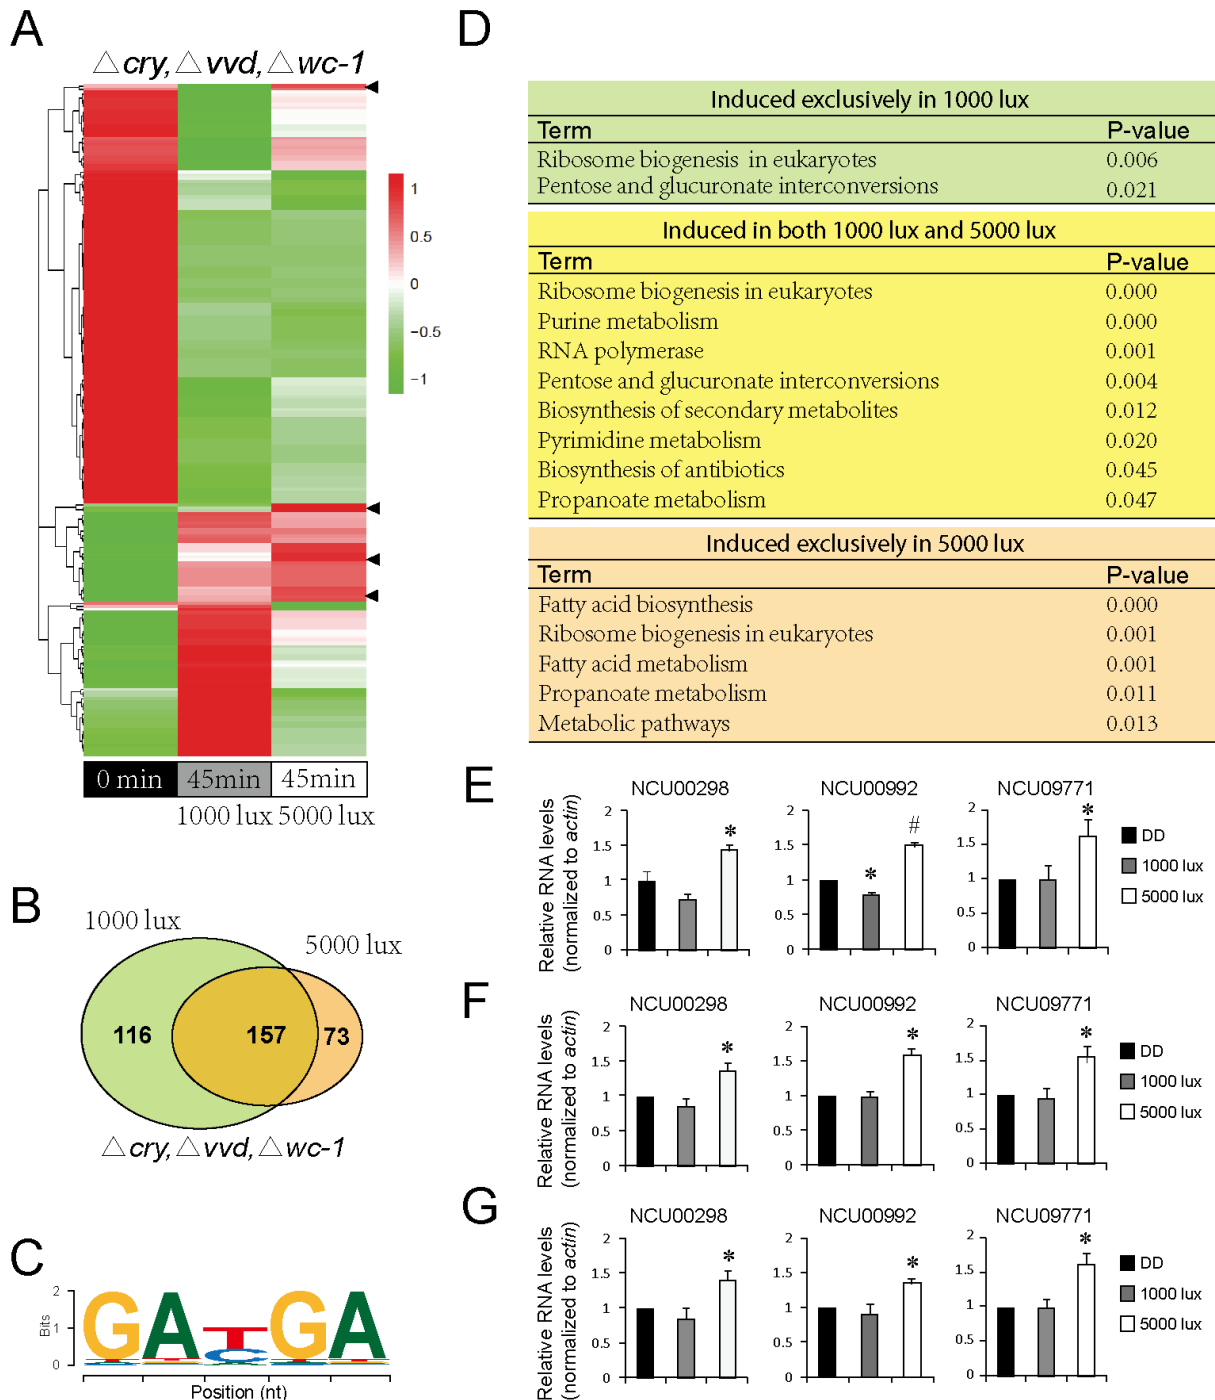

602

603 **Figure 6** Characterization of genes showing light responses in high-intensity white light. A.  
 604 Heat map of the differentially expressed genes in  $\Delta vvd$ ,  $\Delta cry$ ,  $\Delta wc-1$  at DD24, 1000-lux white  
 605 light and 5000-lux white light. The heat map was created according to the RNA-seq data. B.  
 606 Venn diagram showing the genes up-regulated in 1000 lux and 5000 lux relative to DD24,  
 607 respectively. C. Sequence logo of a predicted motif. D. Distribution of affected KEGG pathways  
 608 according to the up-regulated genes revealed from RNA-seq. E-G. qRT-PCR validation of three  
 609 genes specifically induced by 5000-lux light in  $\Delta vvd$ ,  $\Delta cry$ ,  $\Delta wc-1$  (E),  $\Delta phy-1$ ,  $\Delta phy-2$  (F) and  
 610  $\Delta nop-1$  (G) strains. The gene expression was normalized to *actin*. The levels at DD24 was  
 611 normalized to 1.0. Data are mean  $\pm$  SE, n=3.

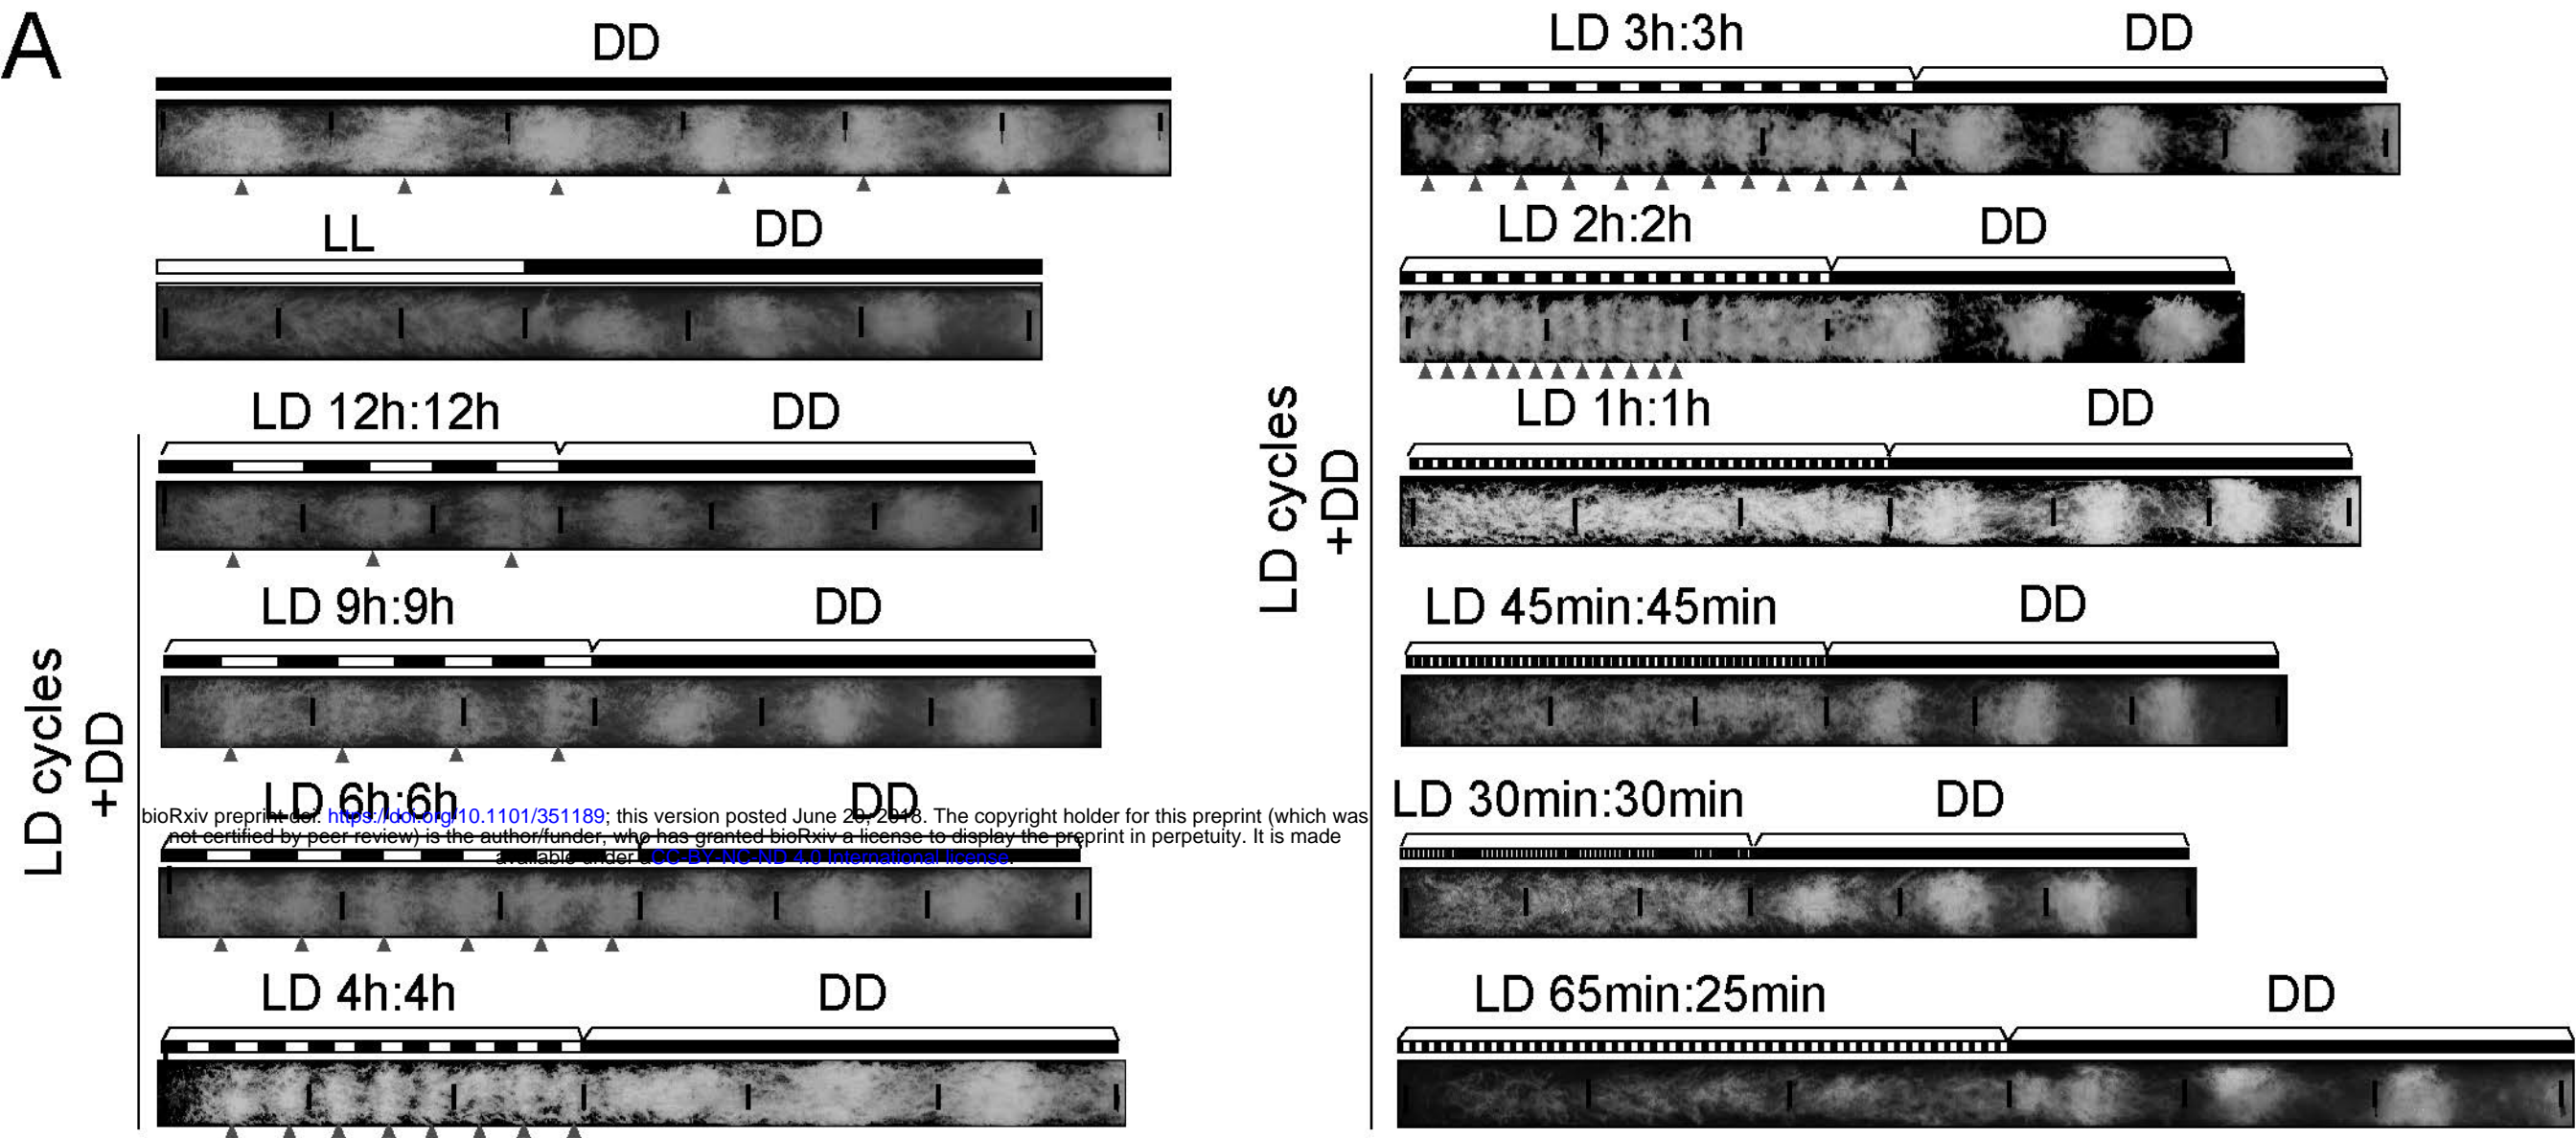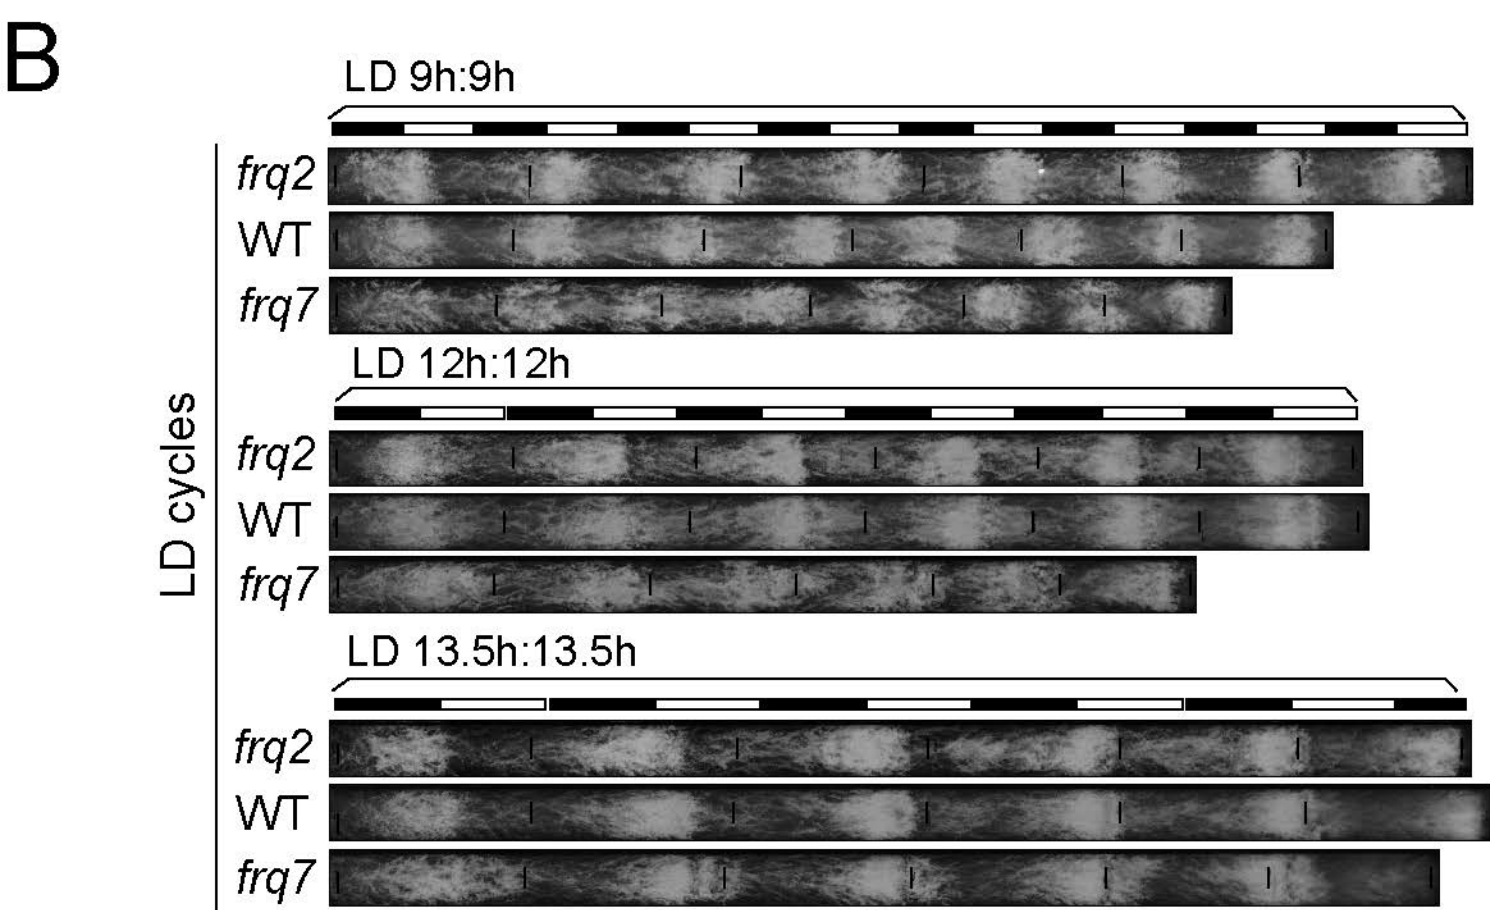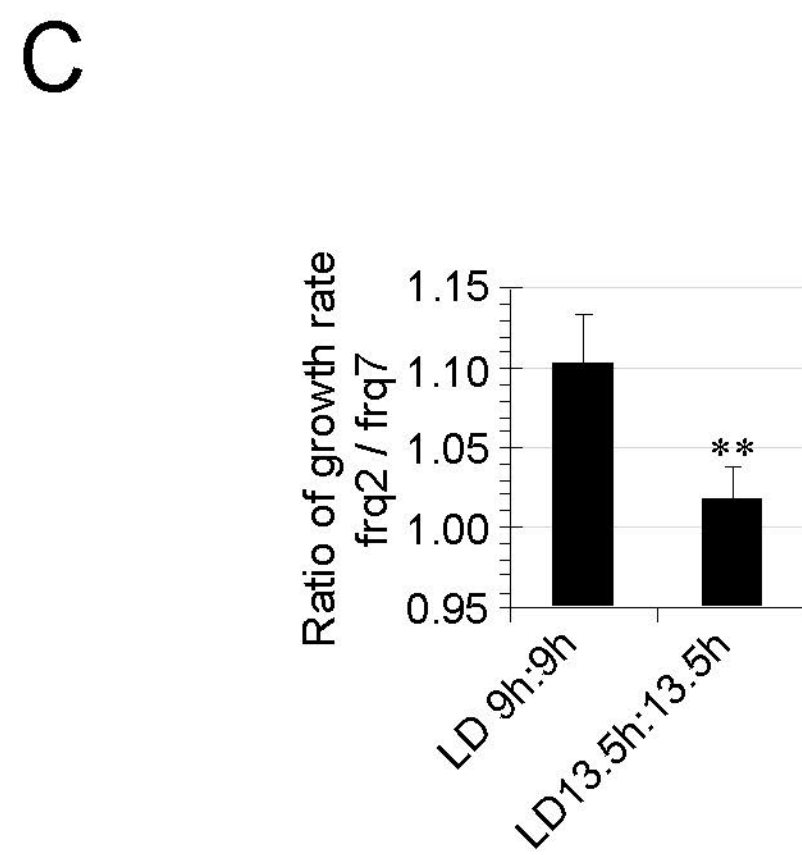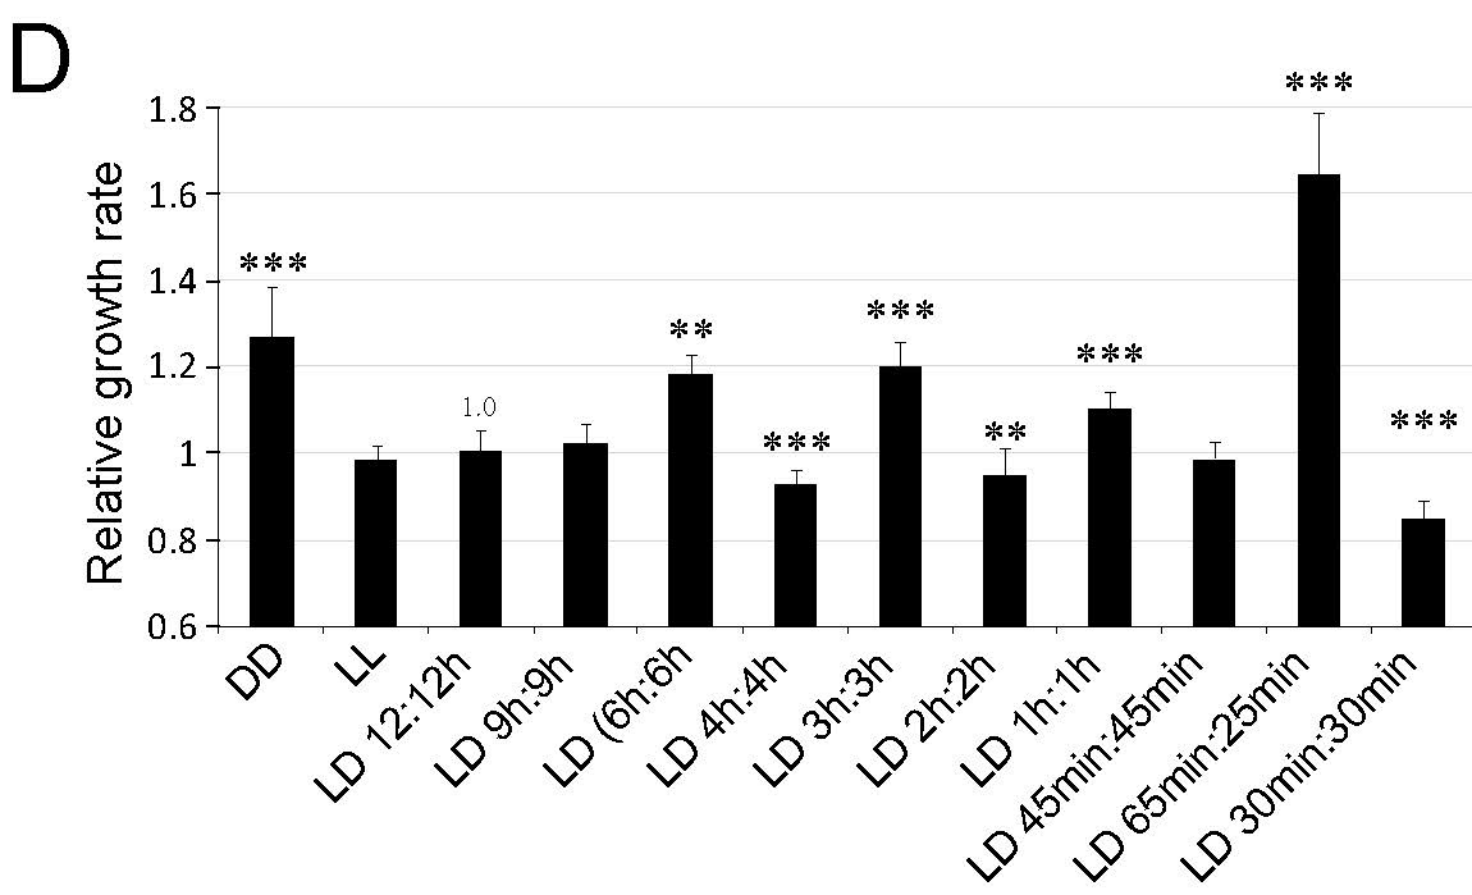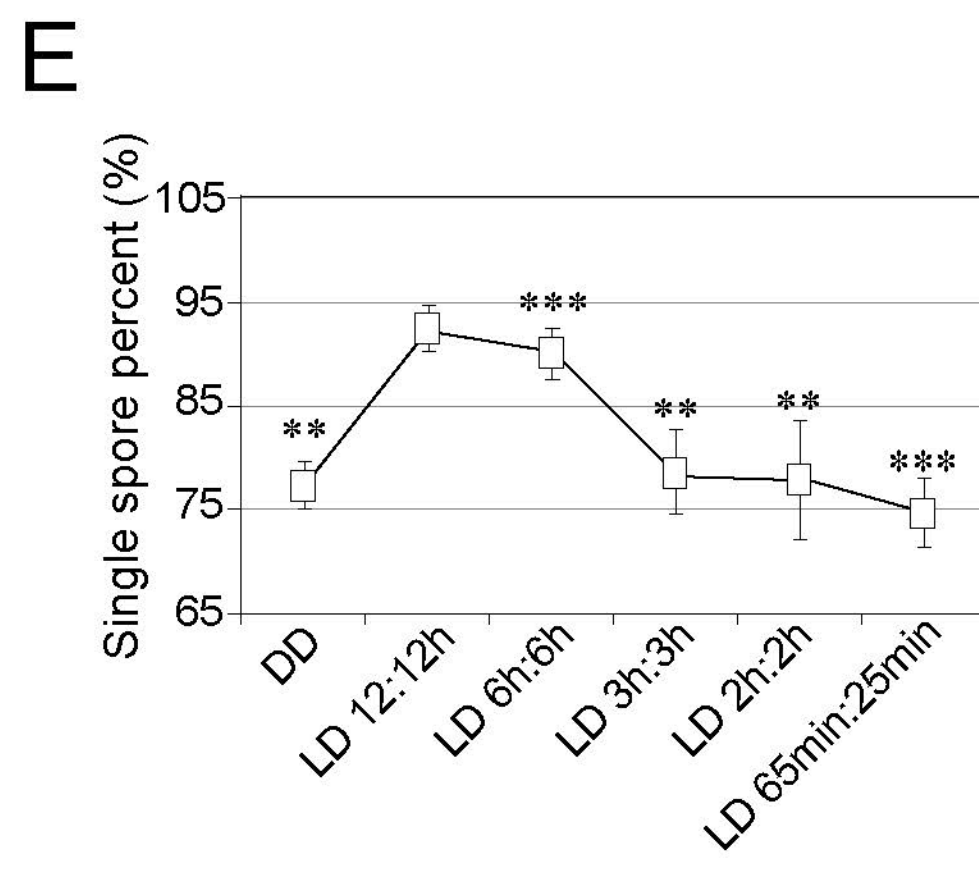

**A**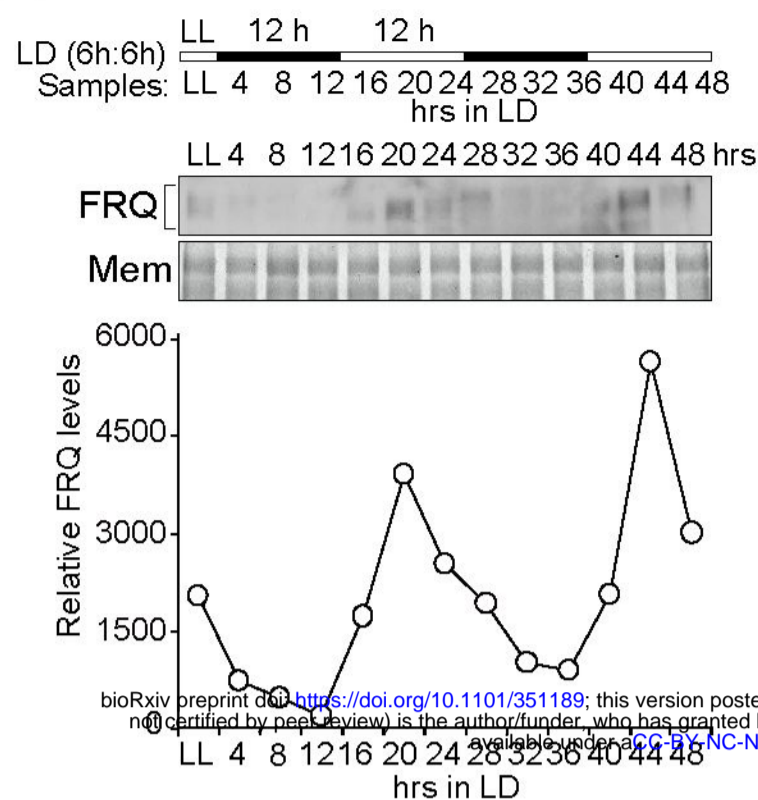**C**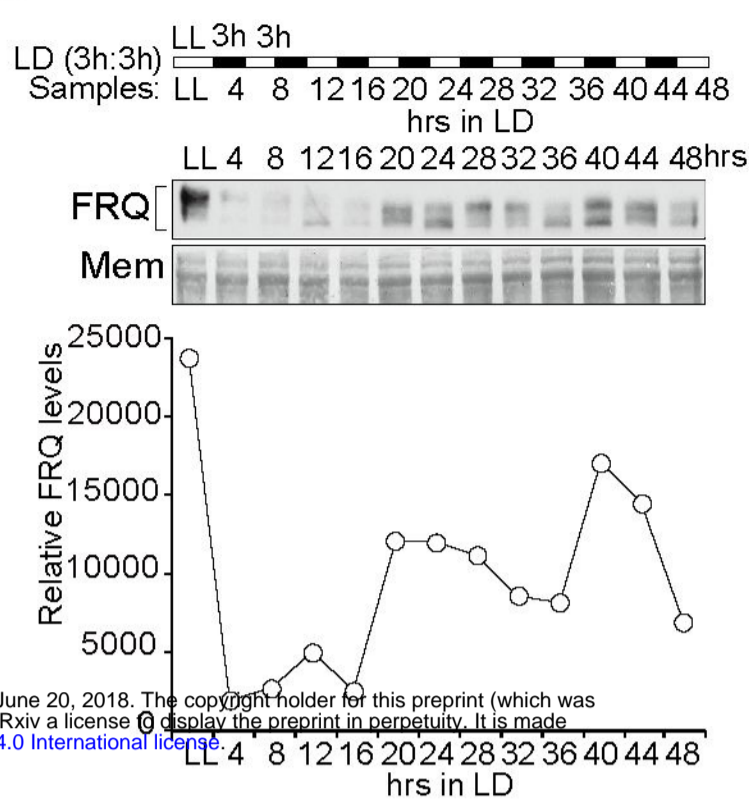**E**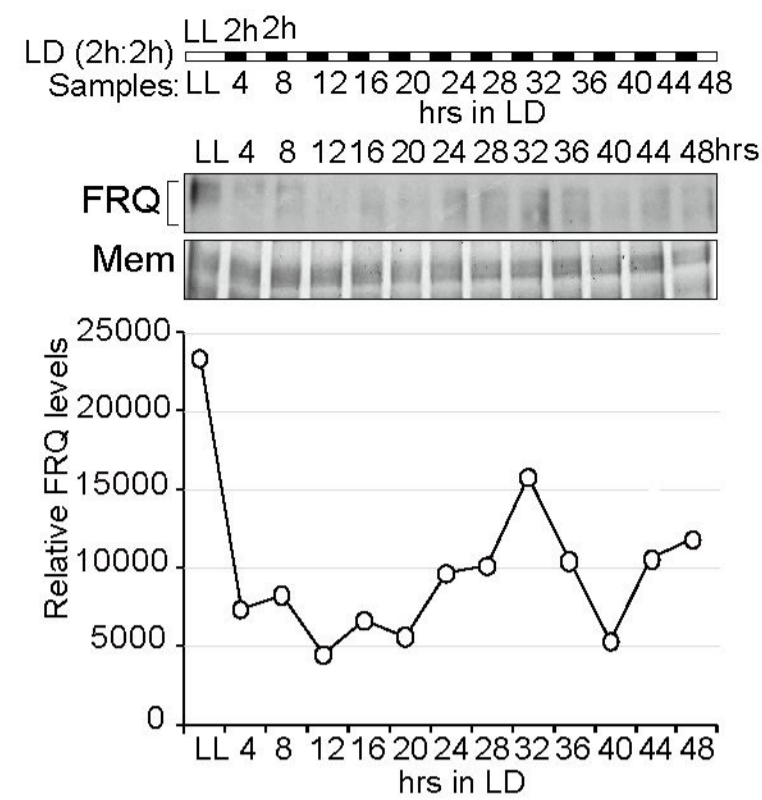**B**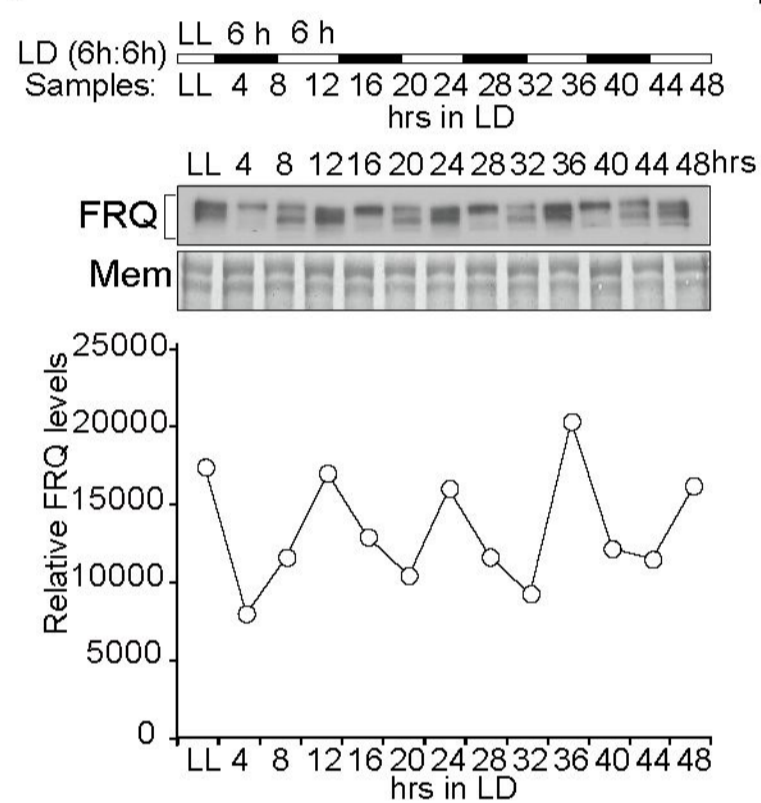**D**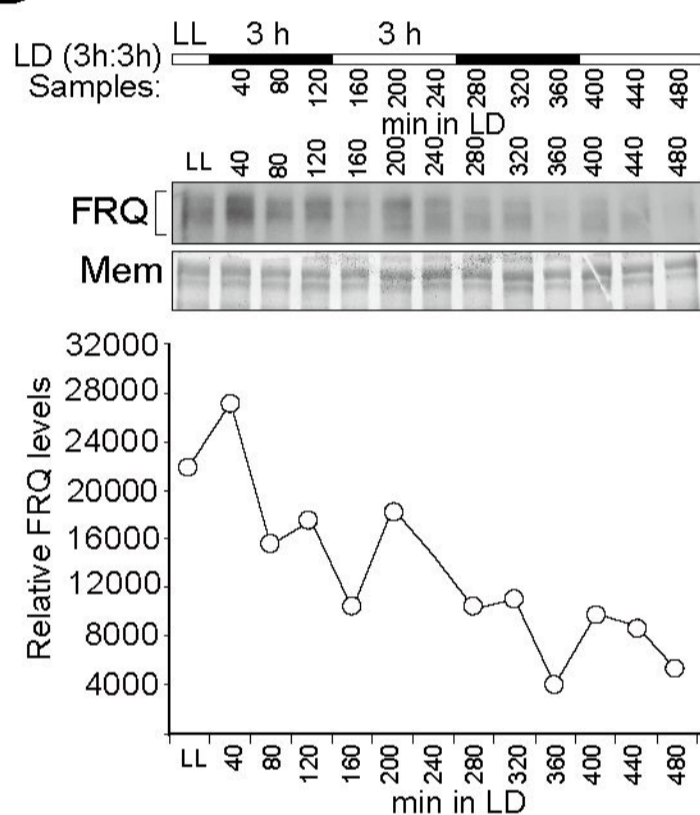**F**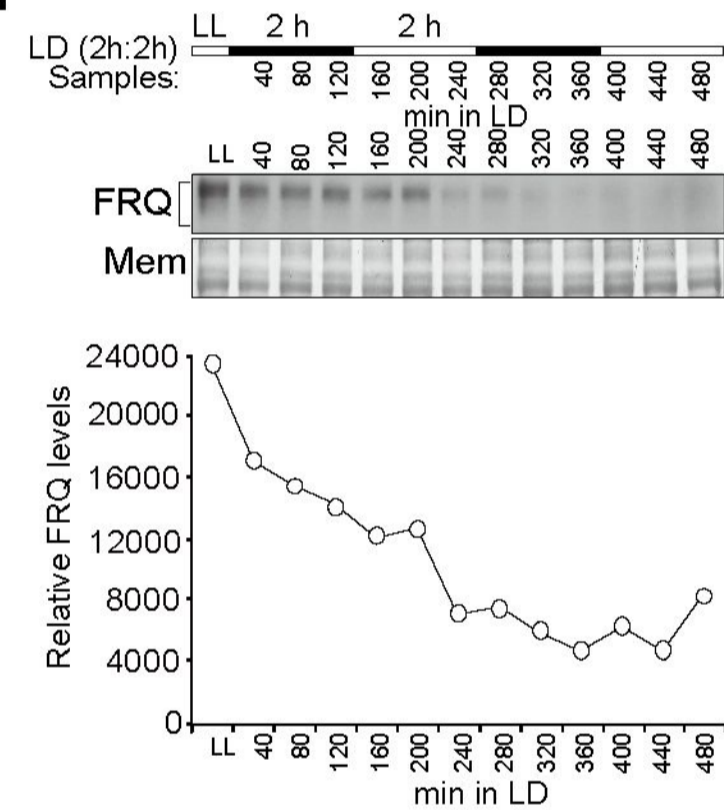**G**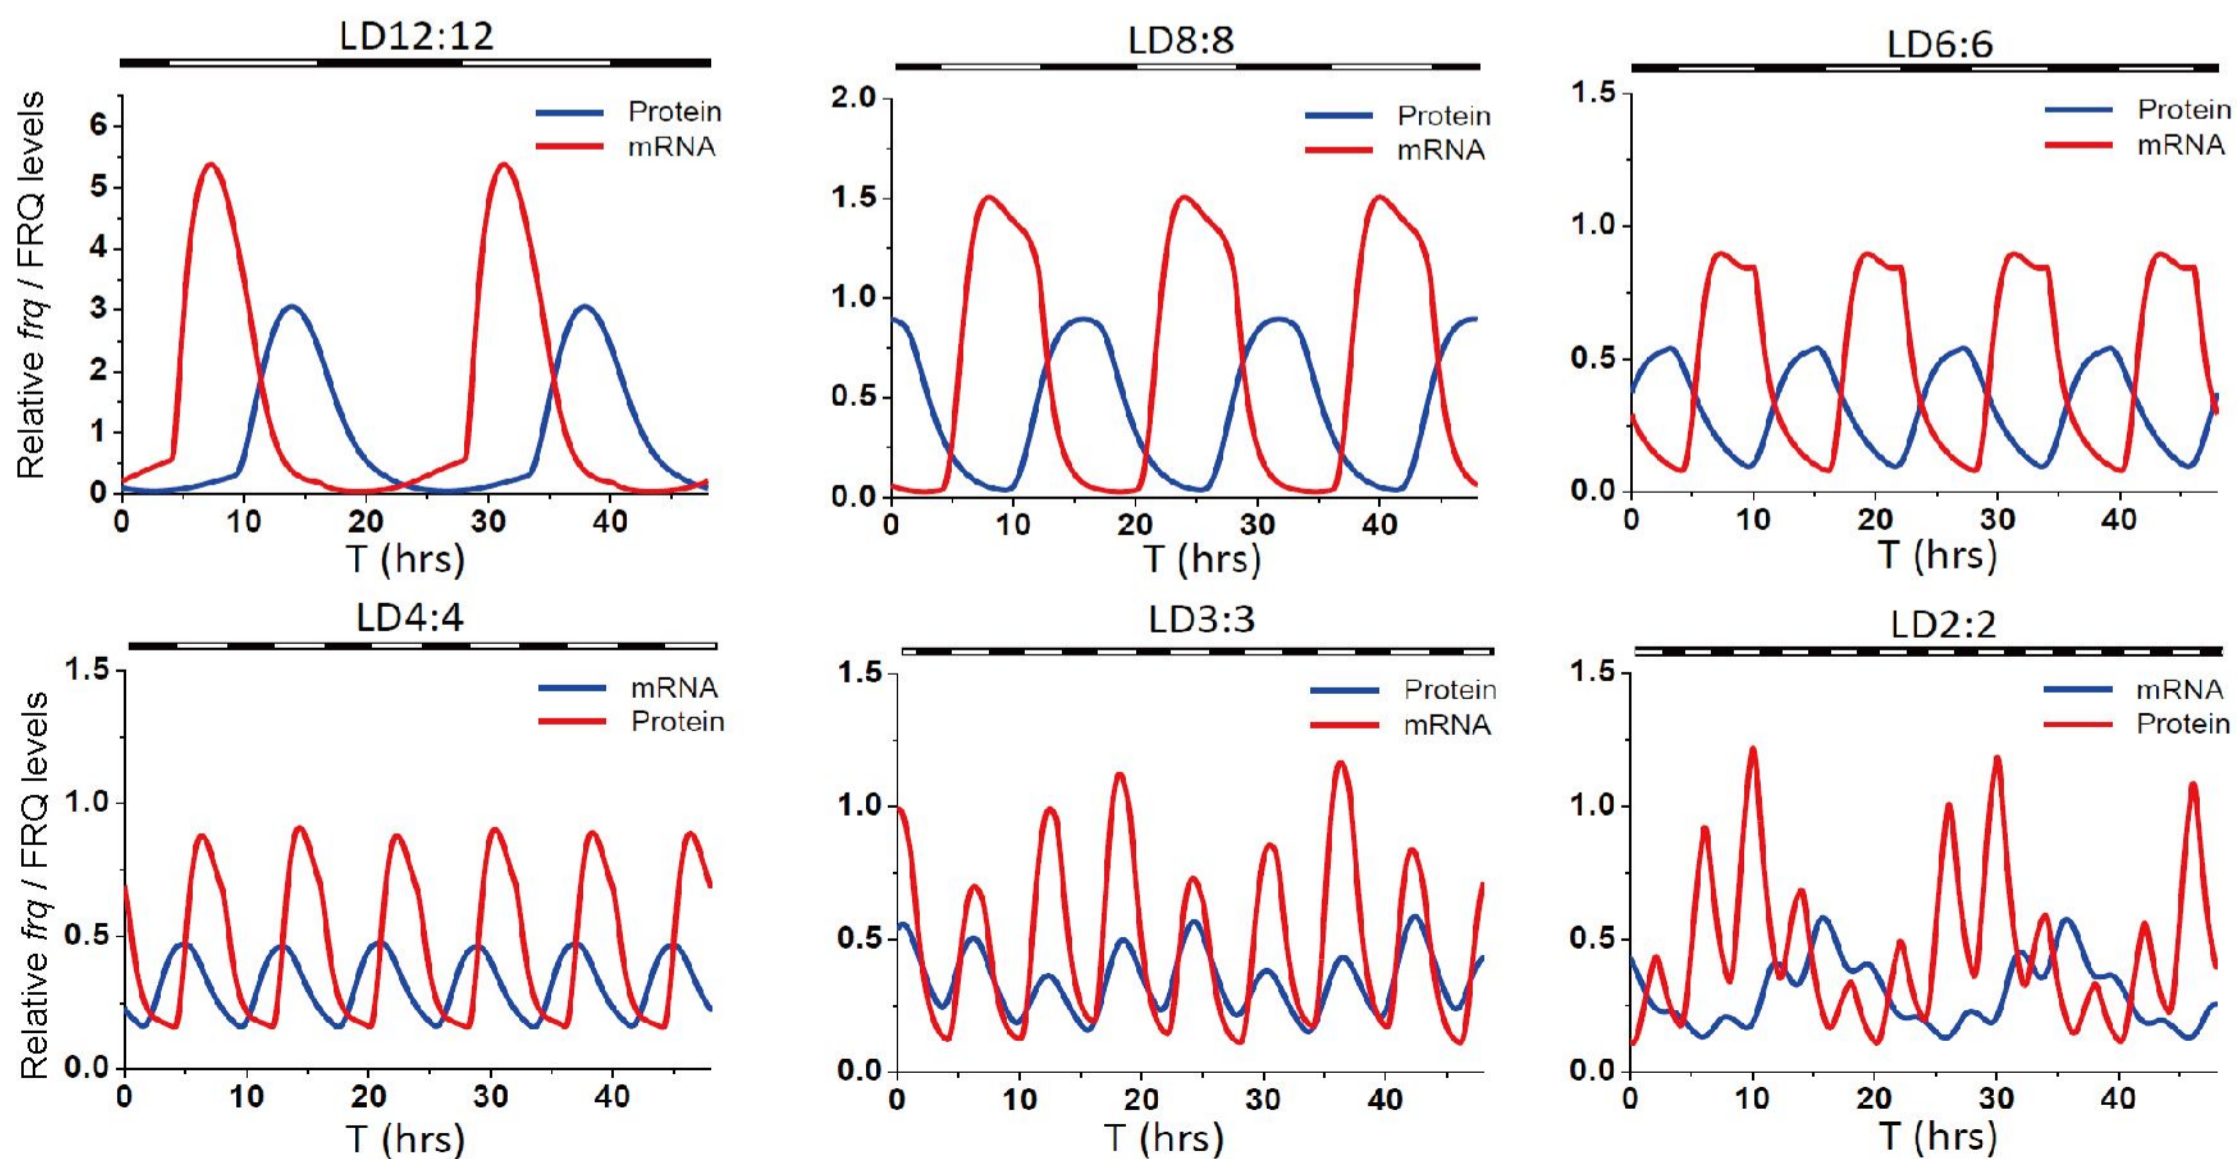

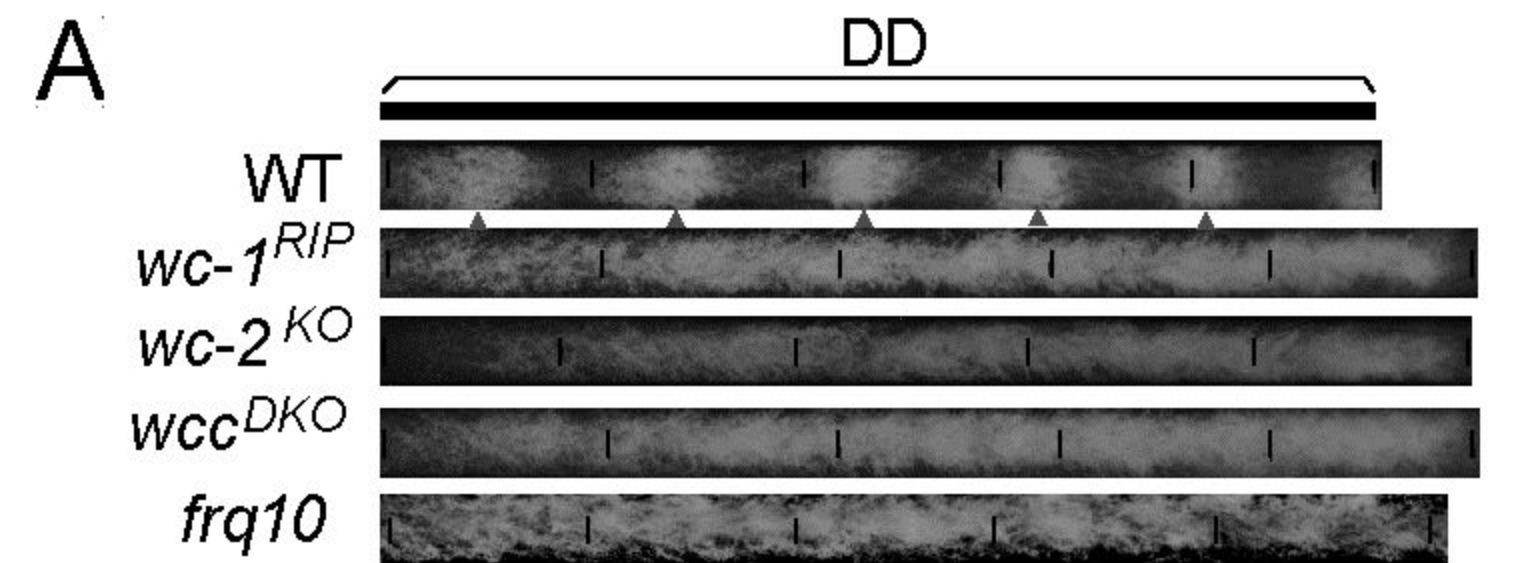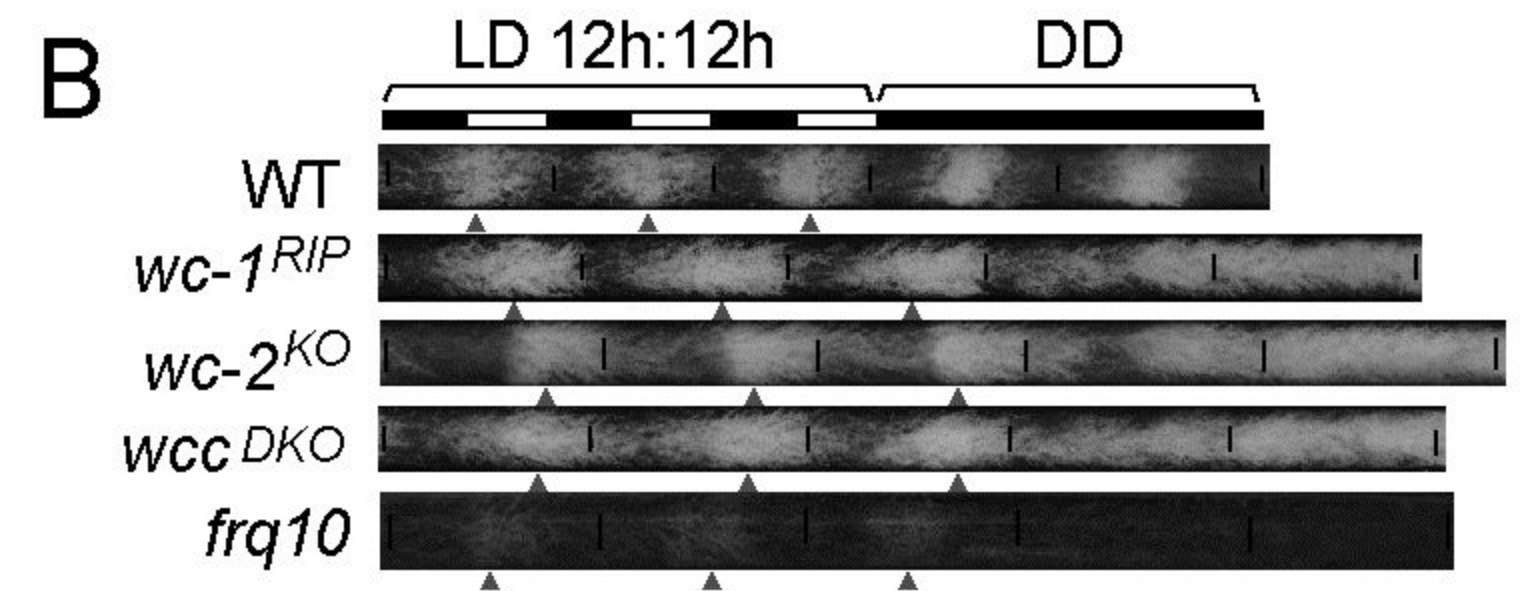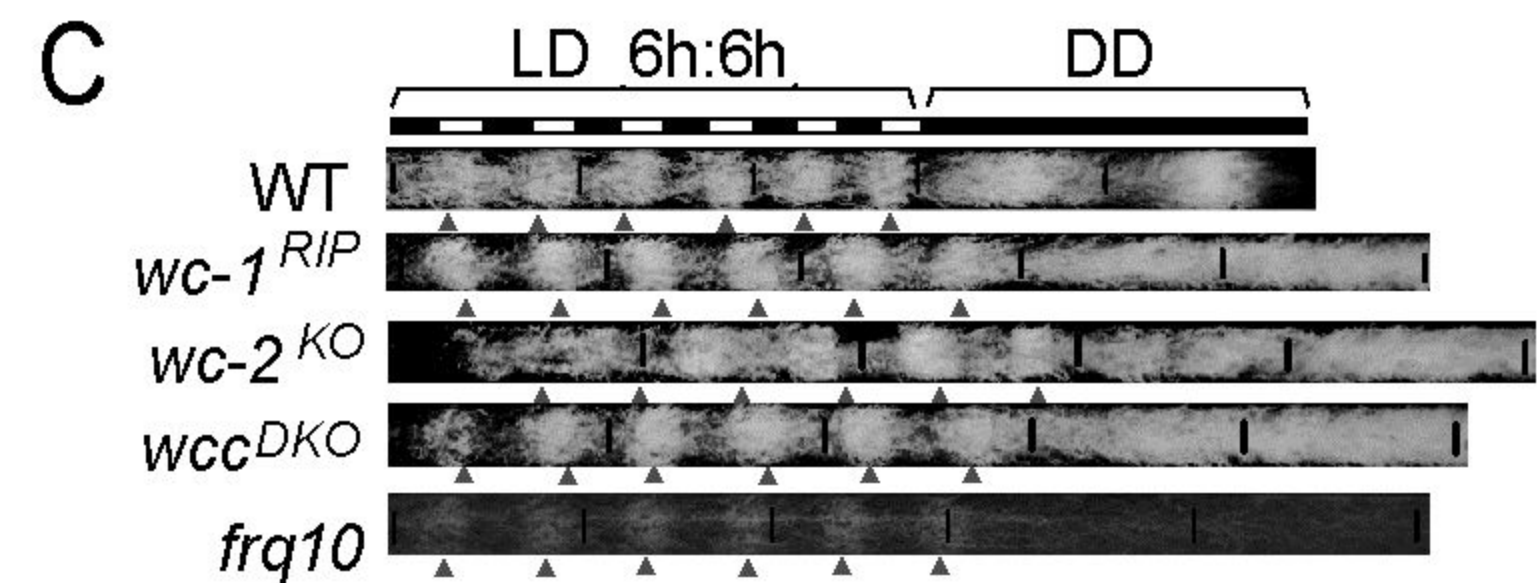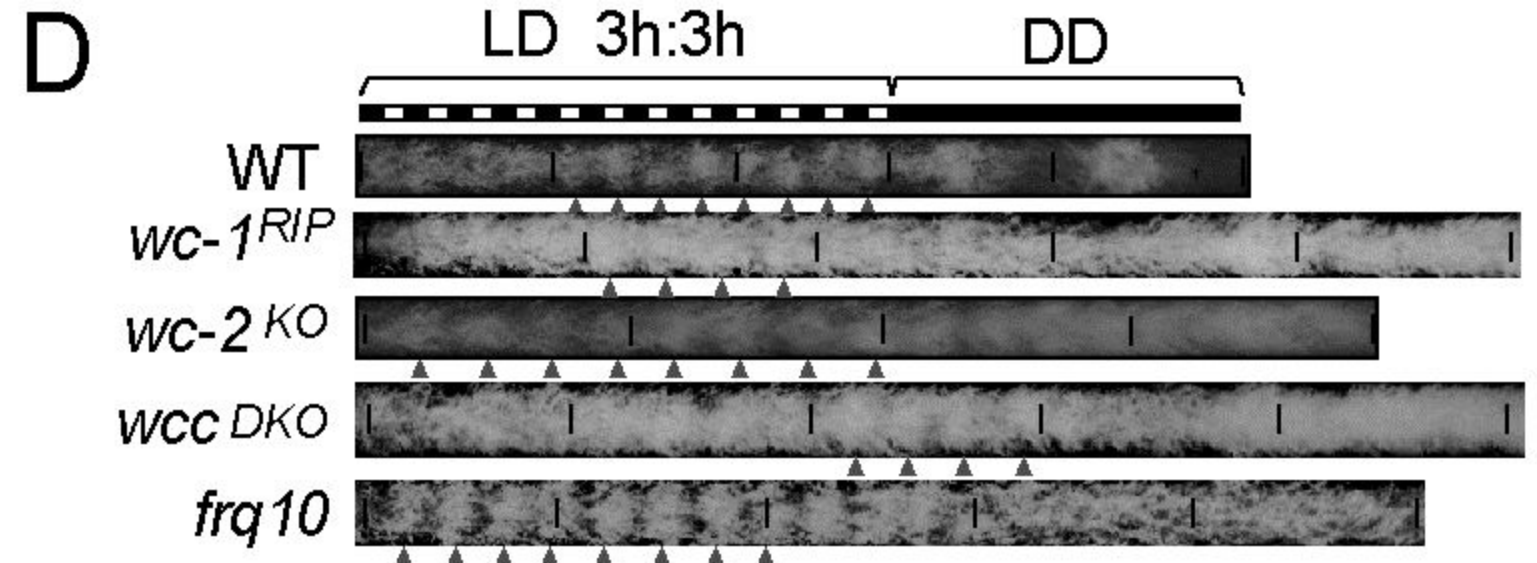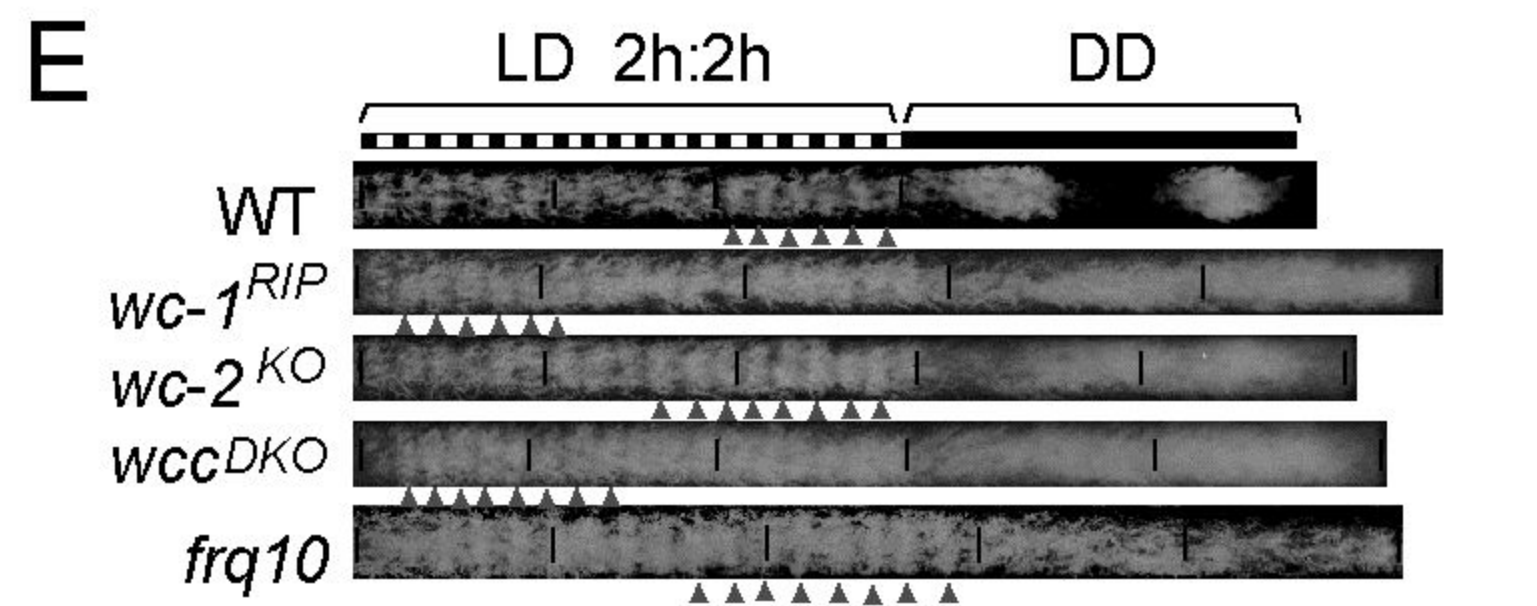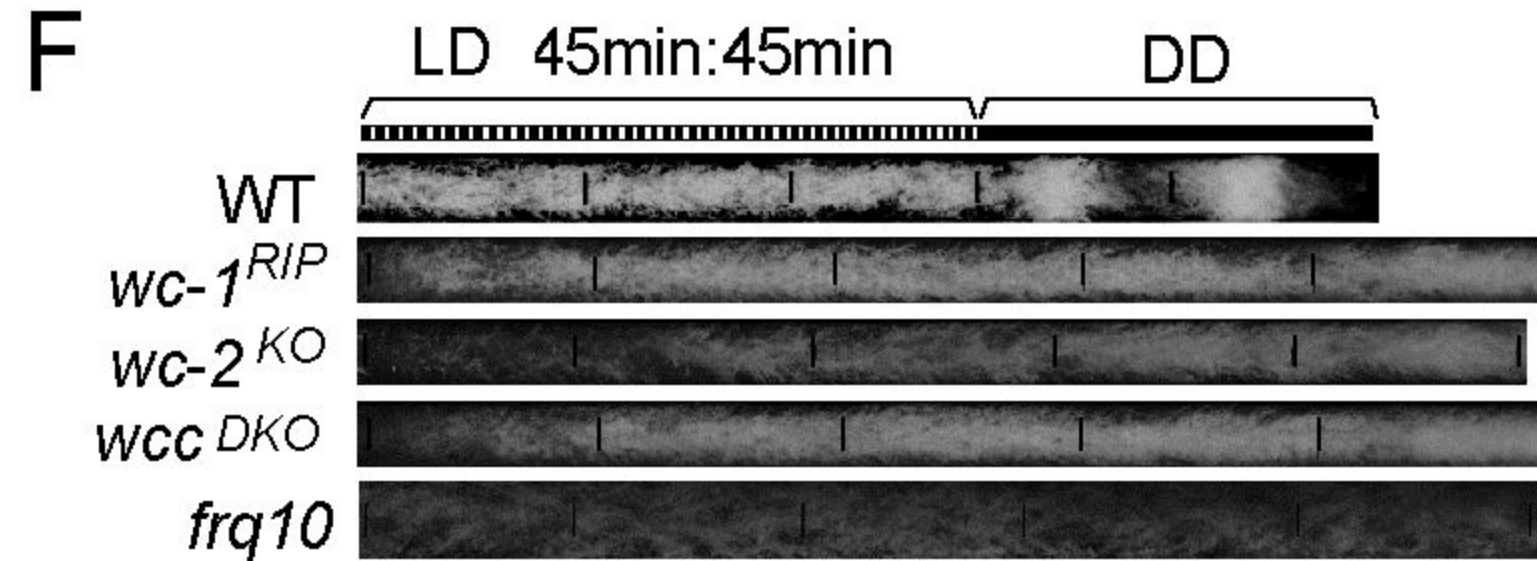

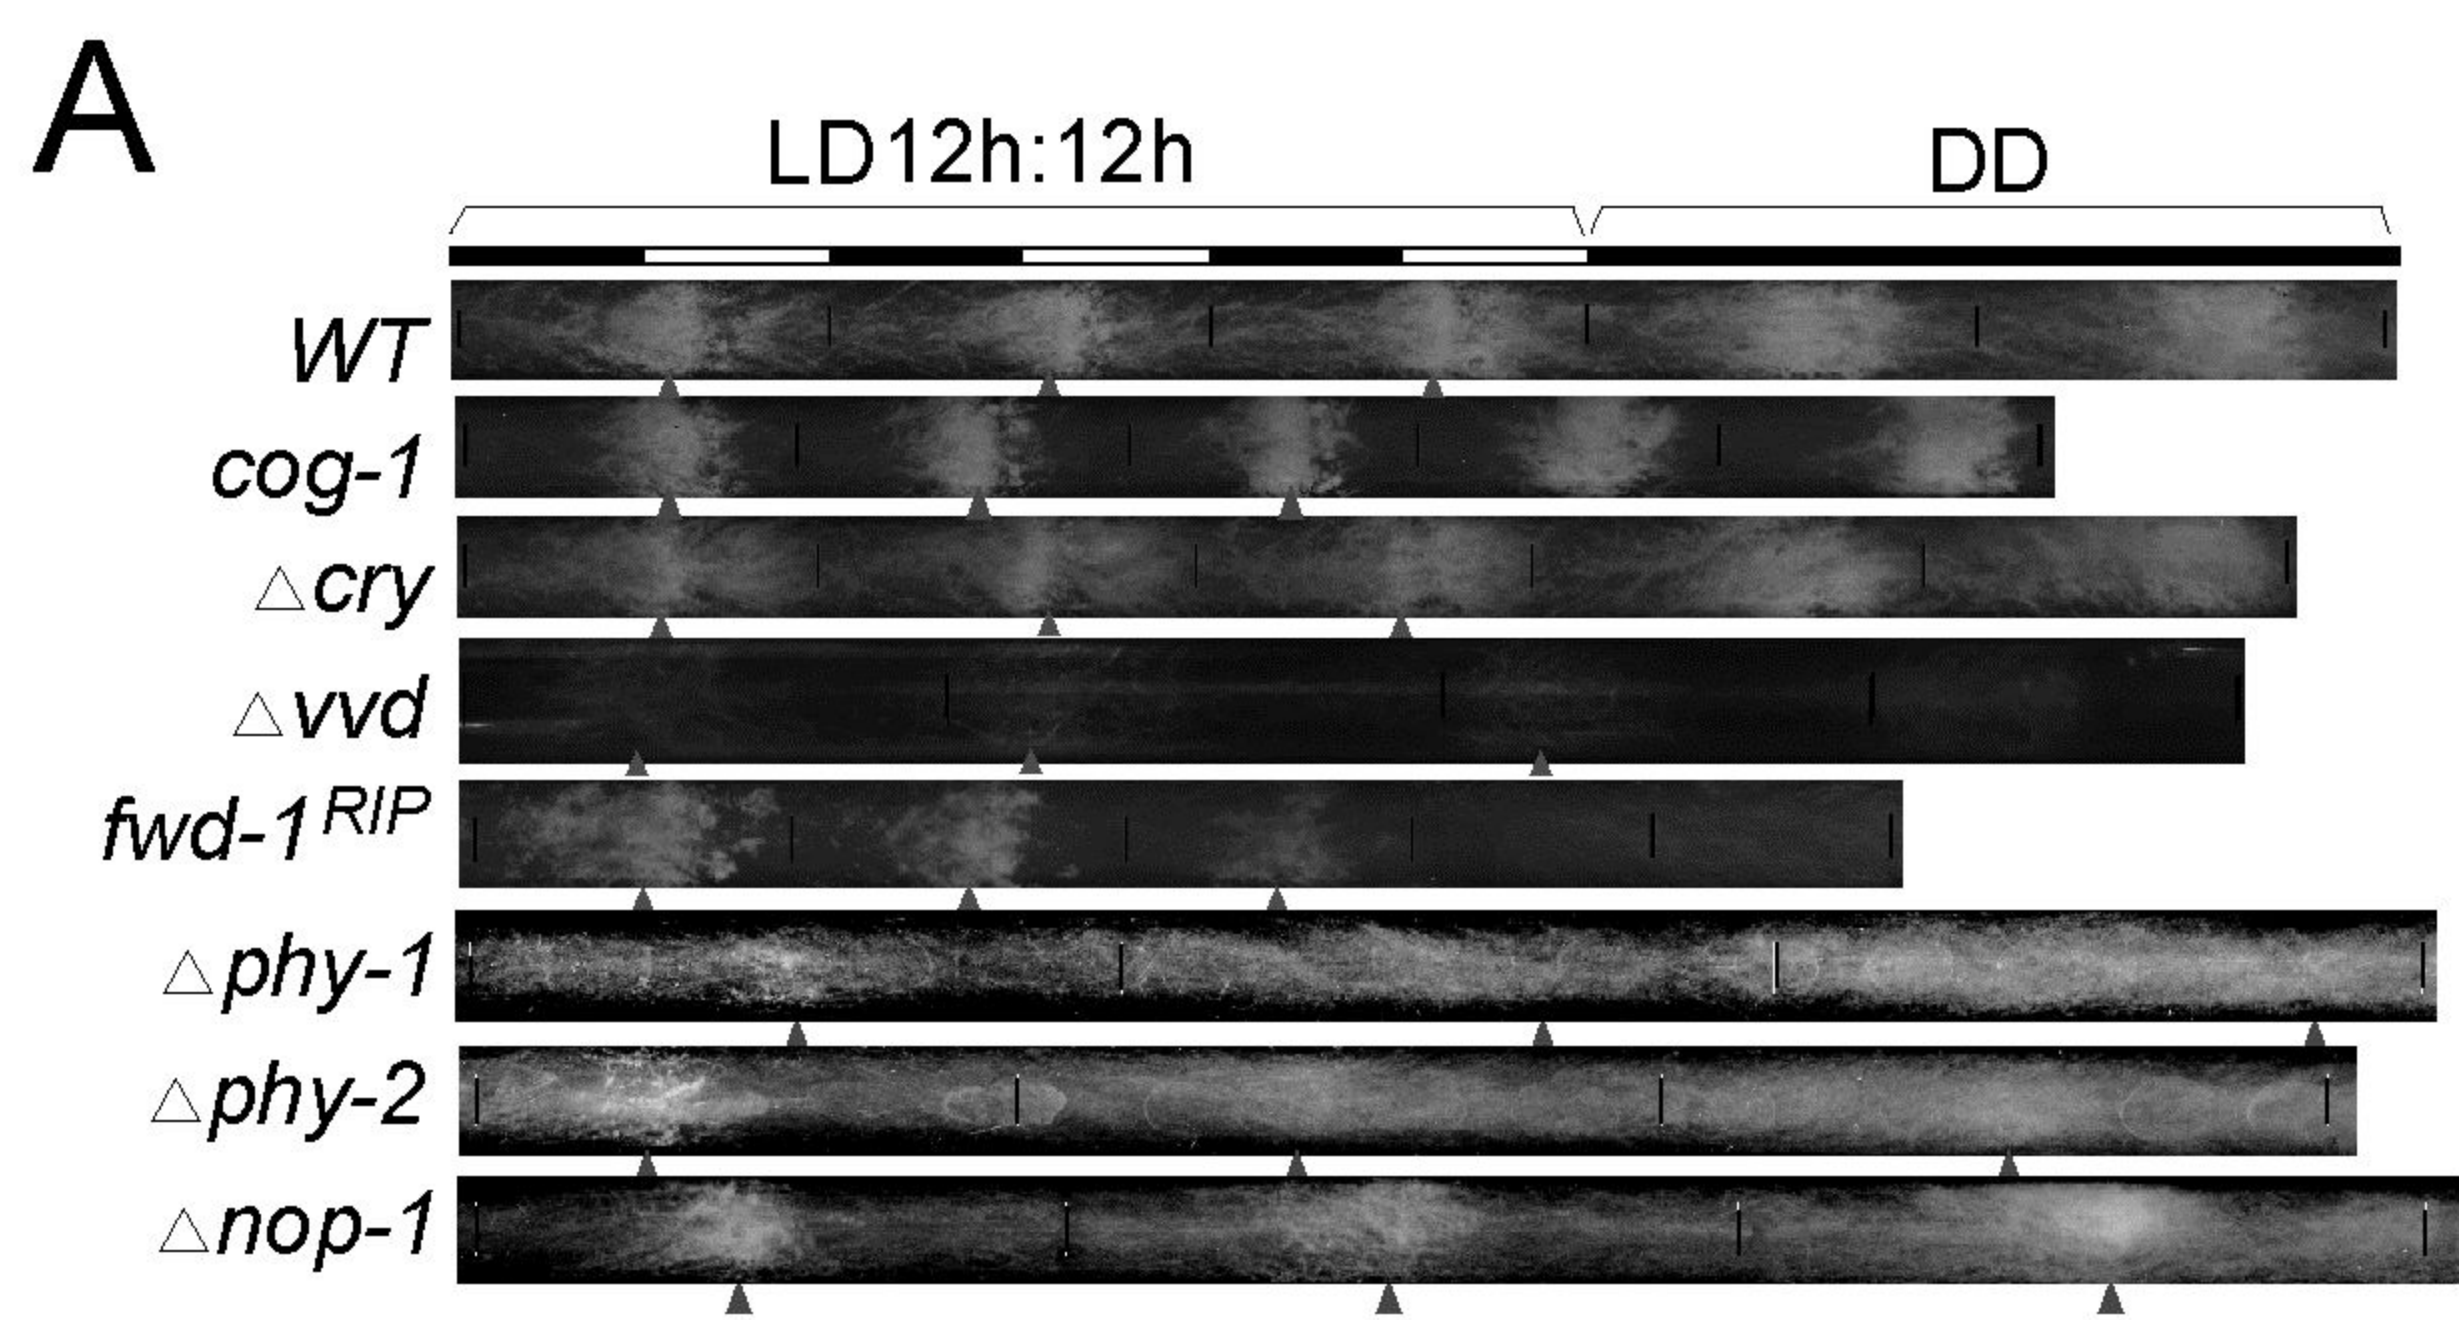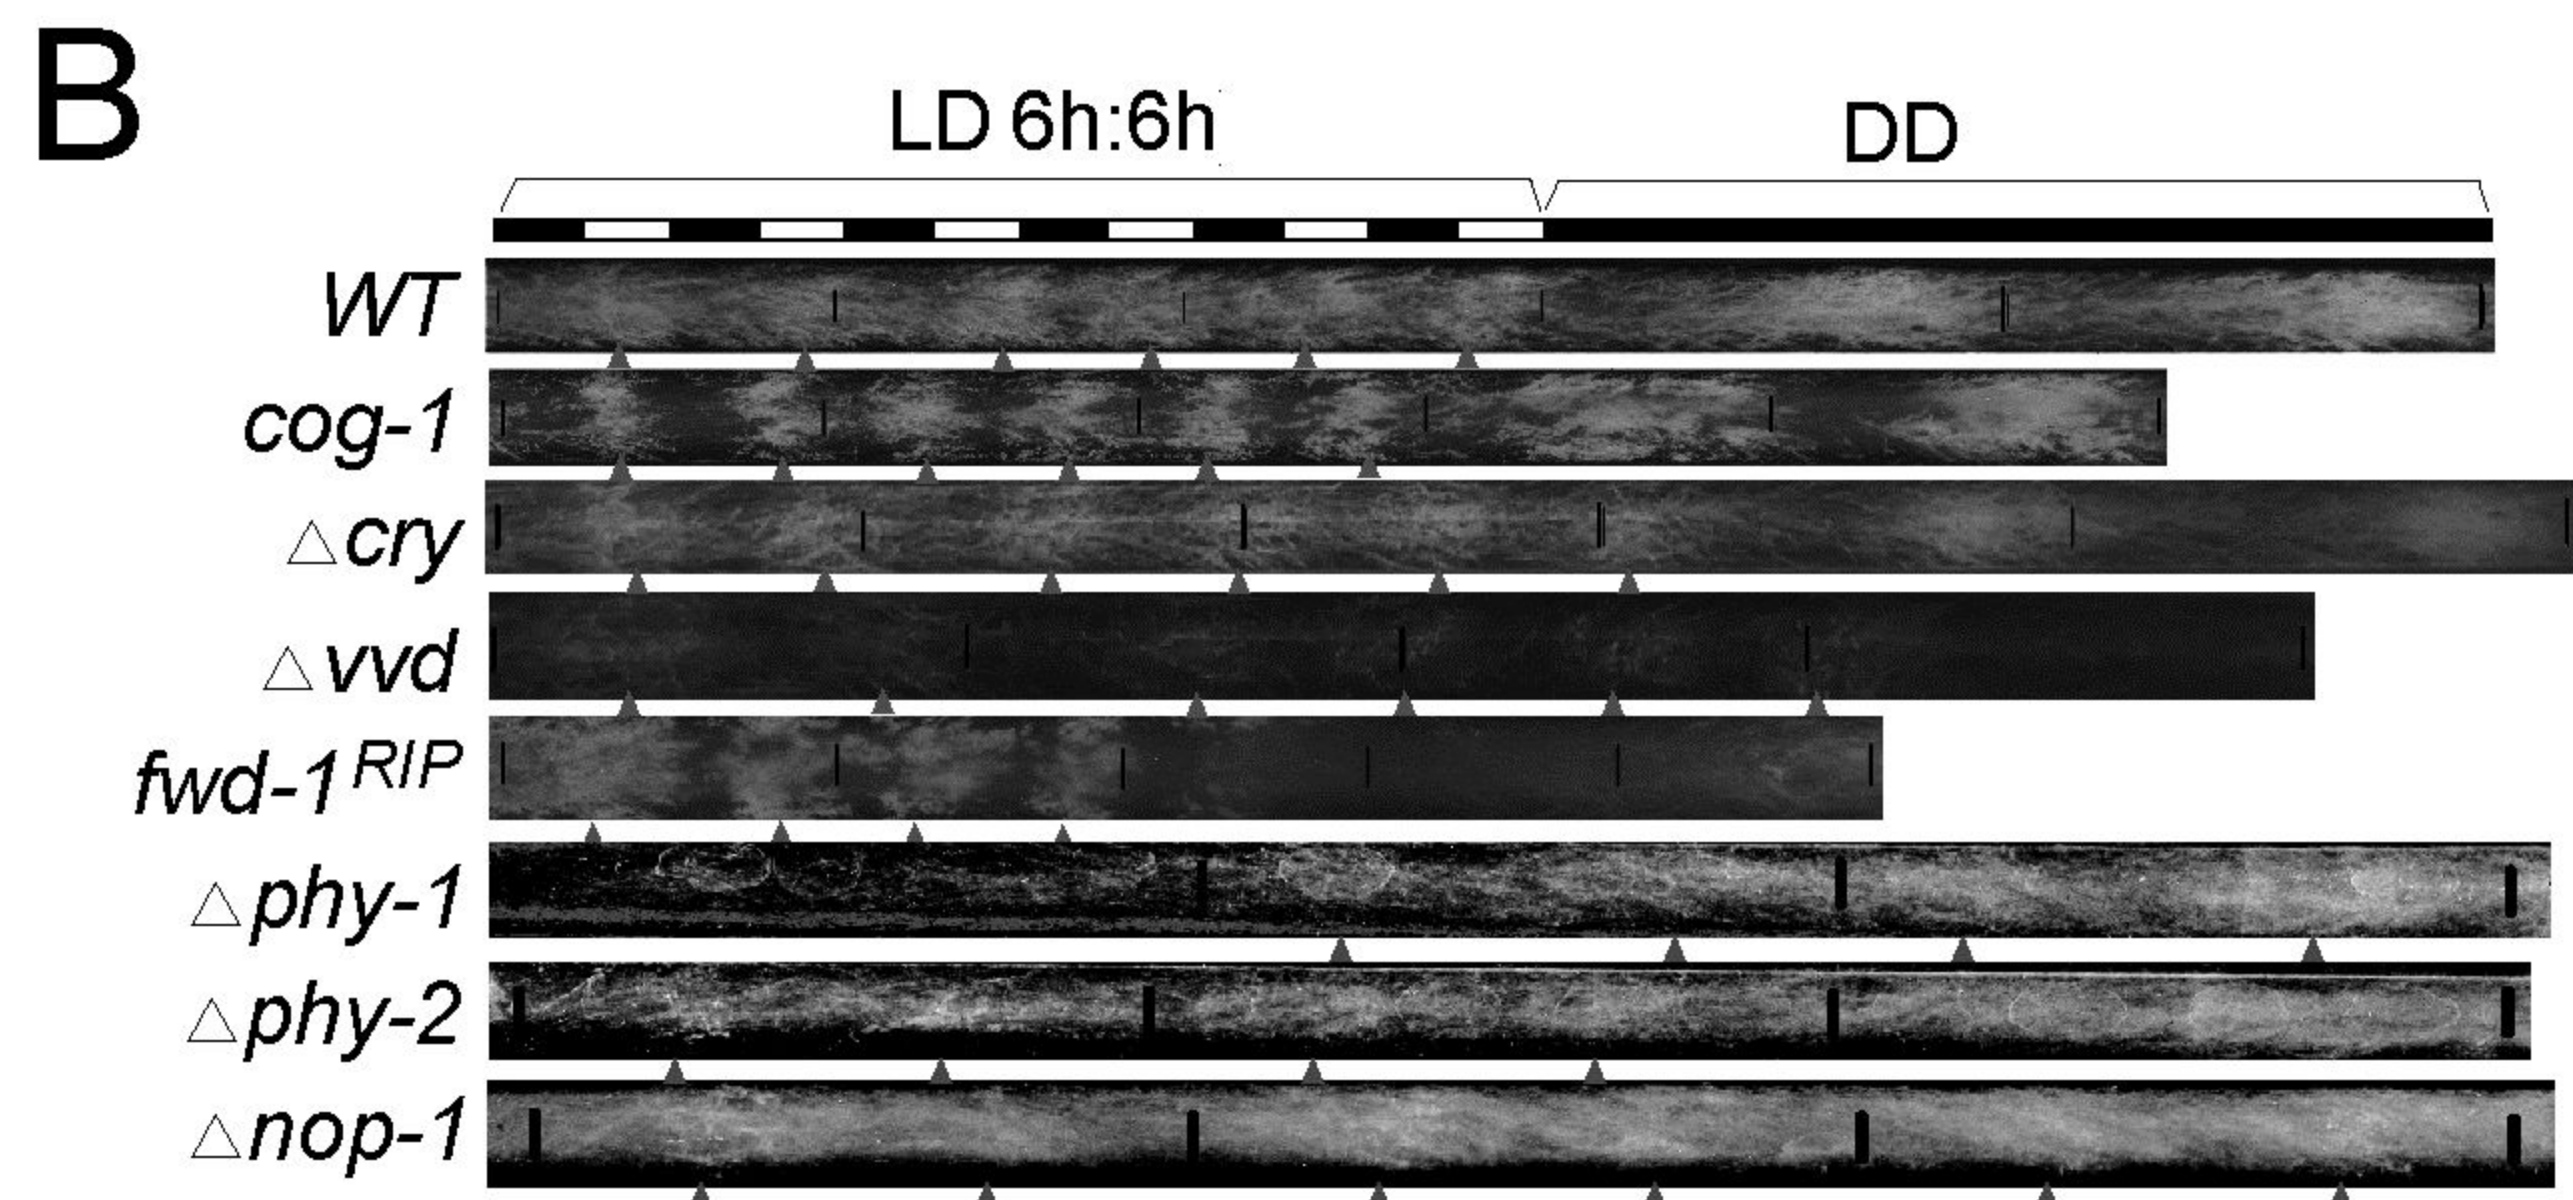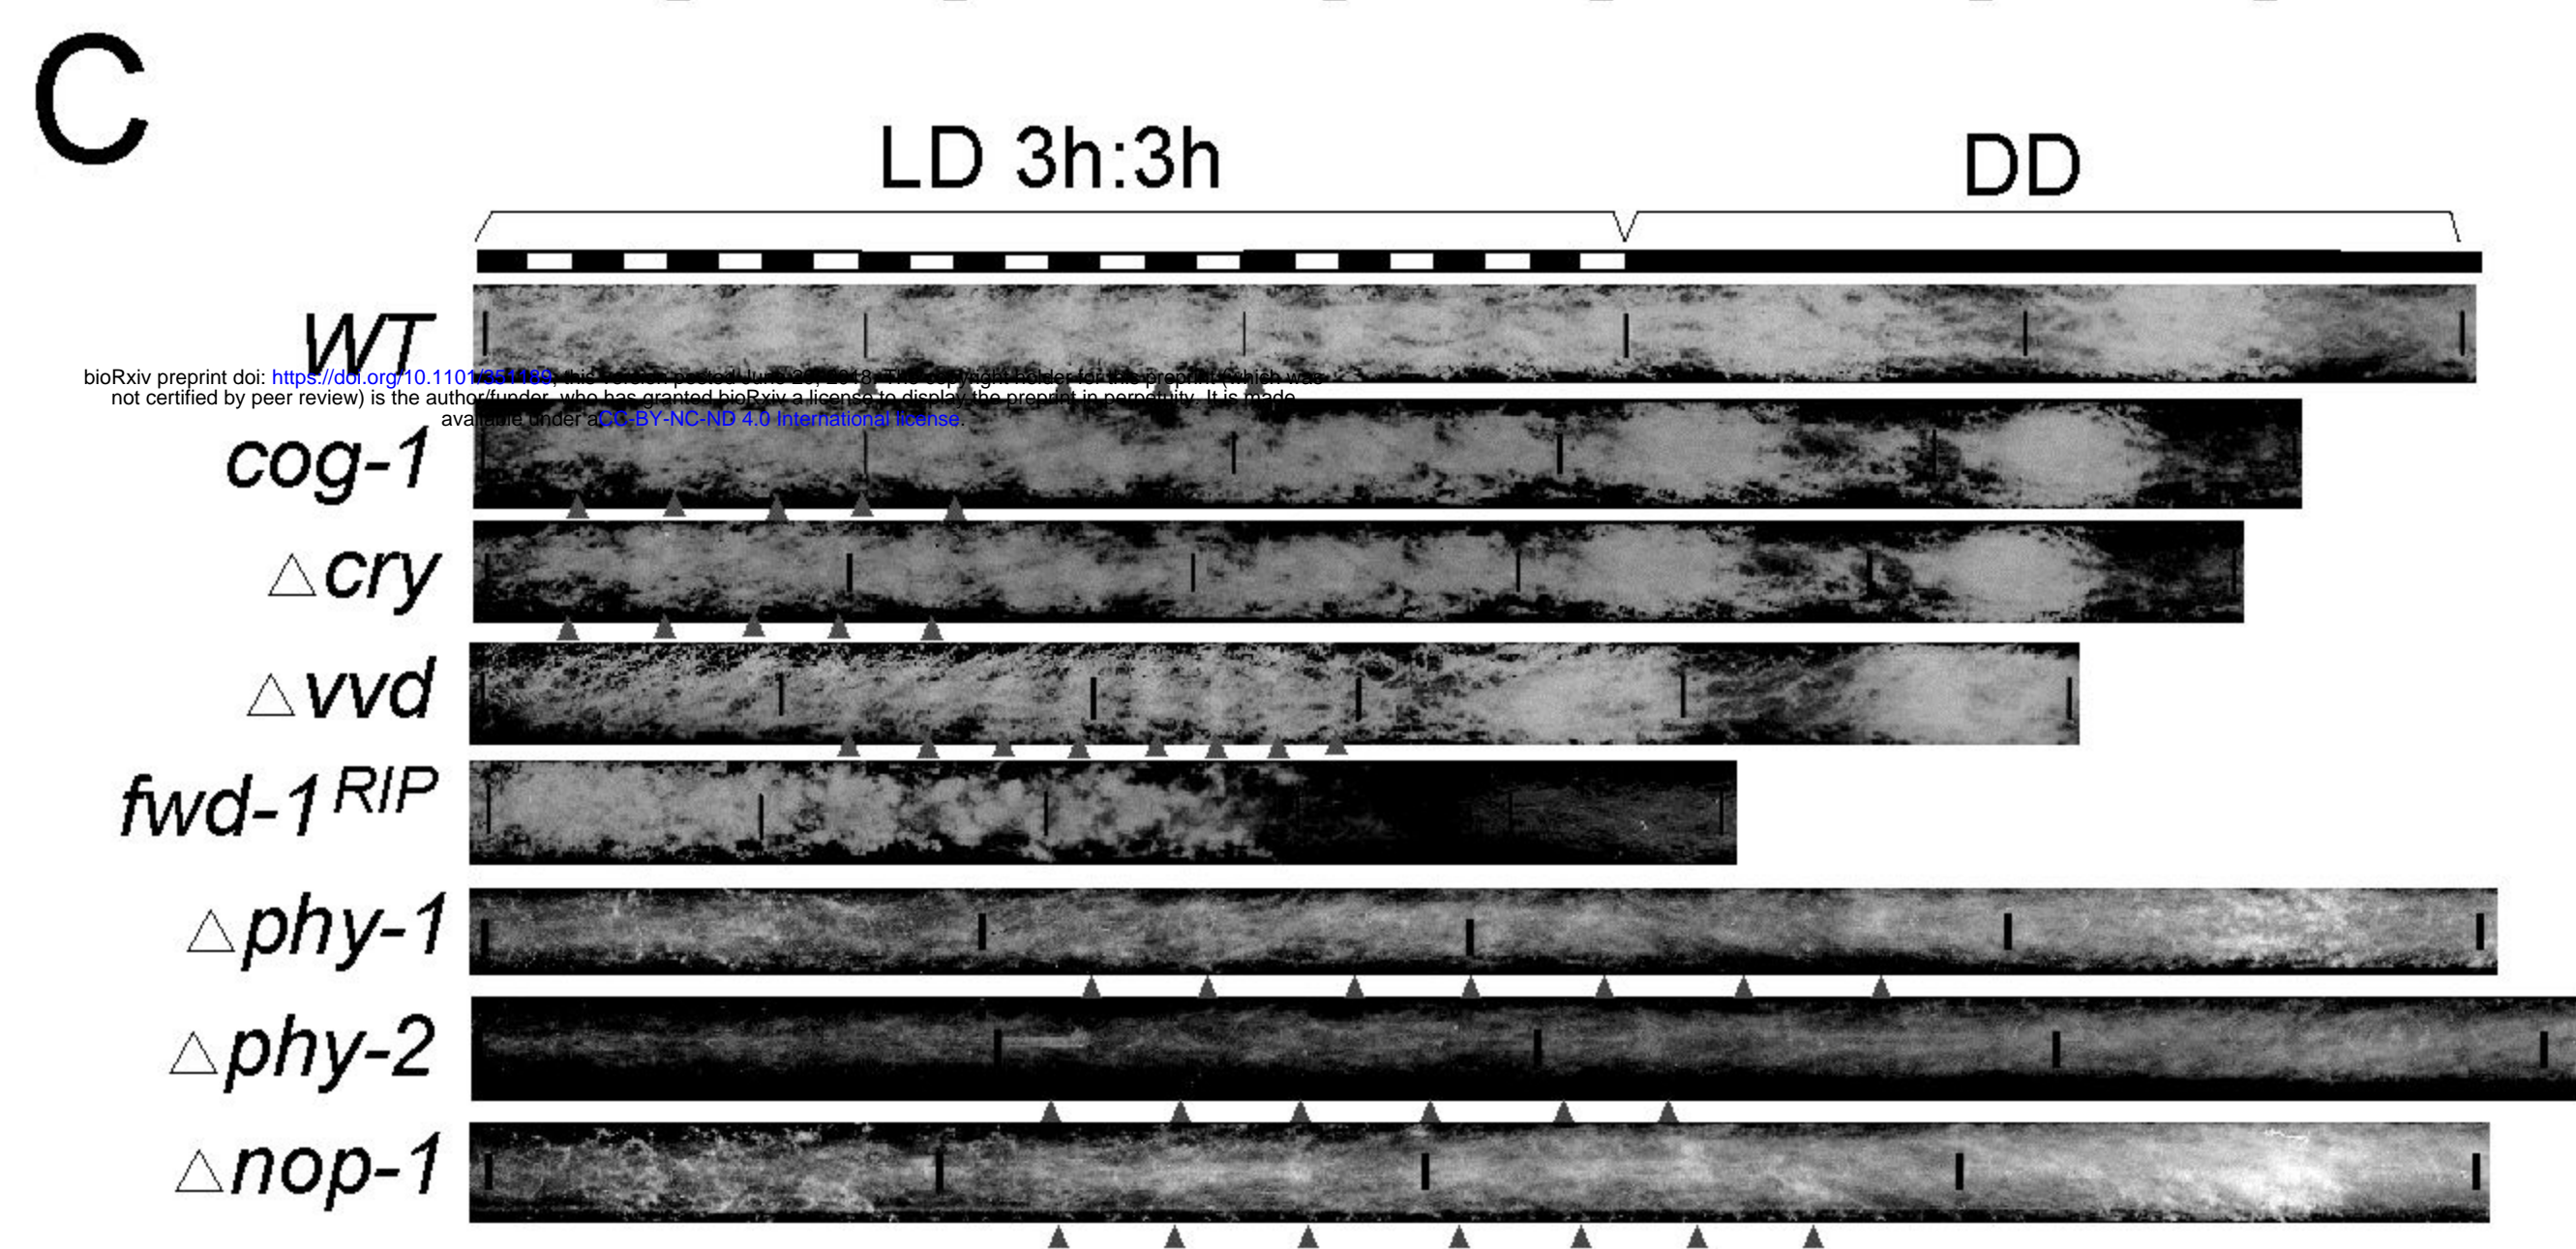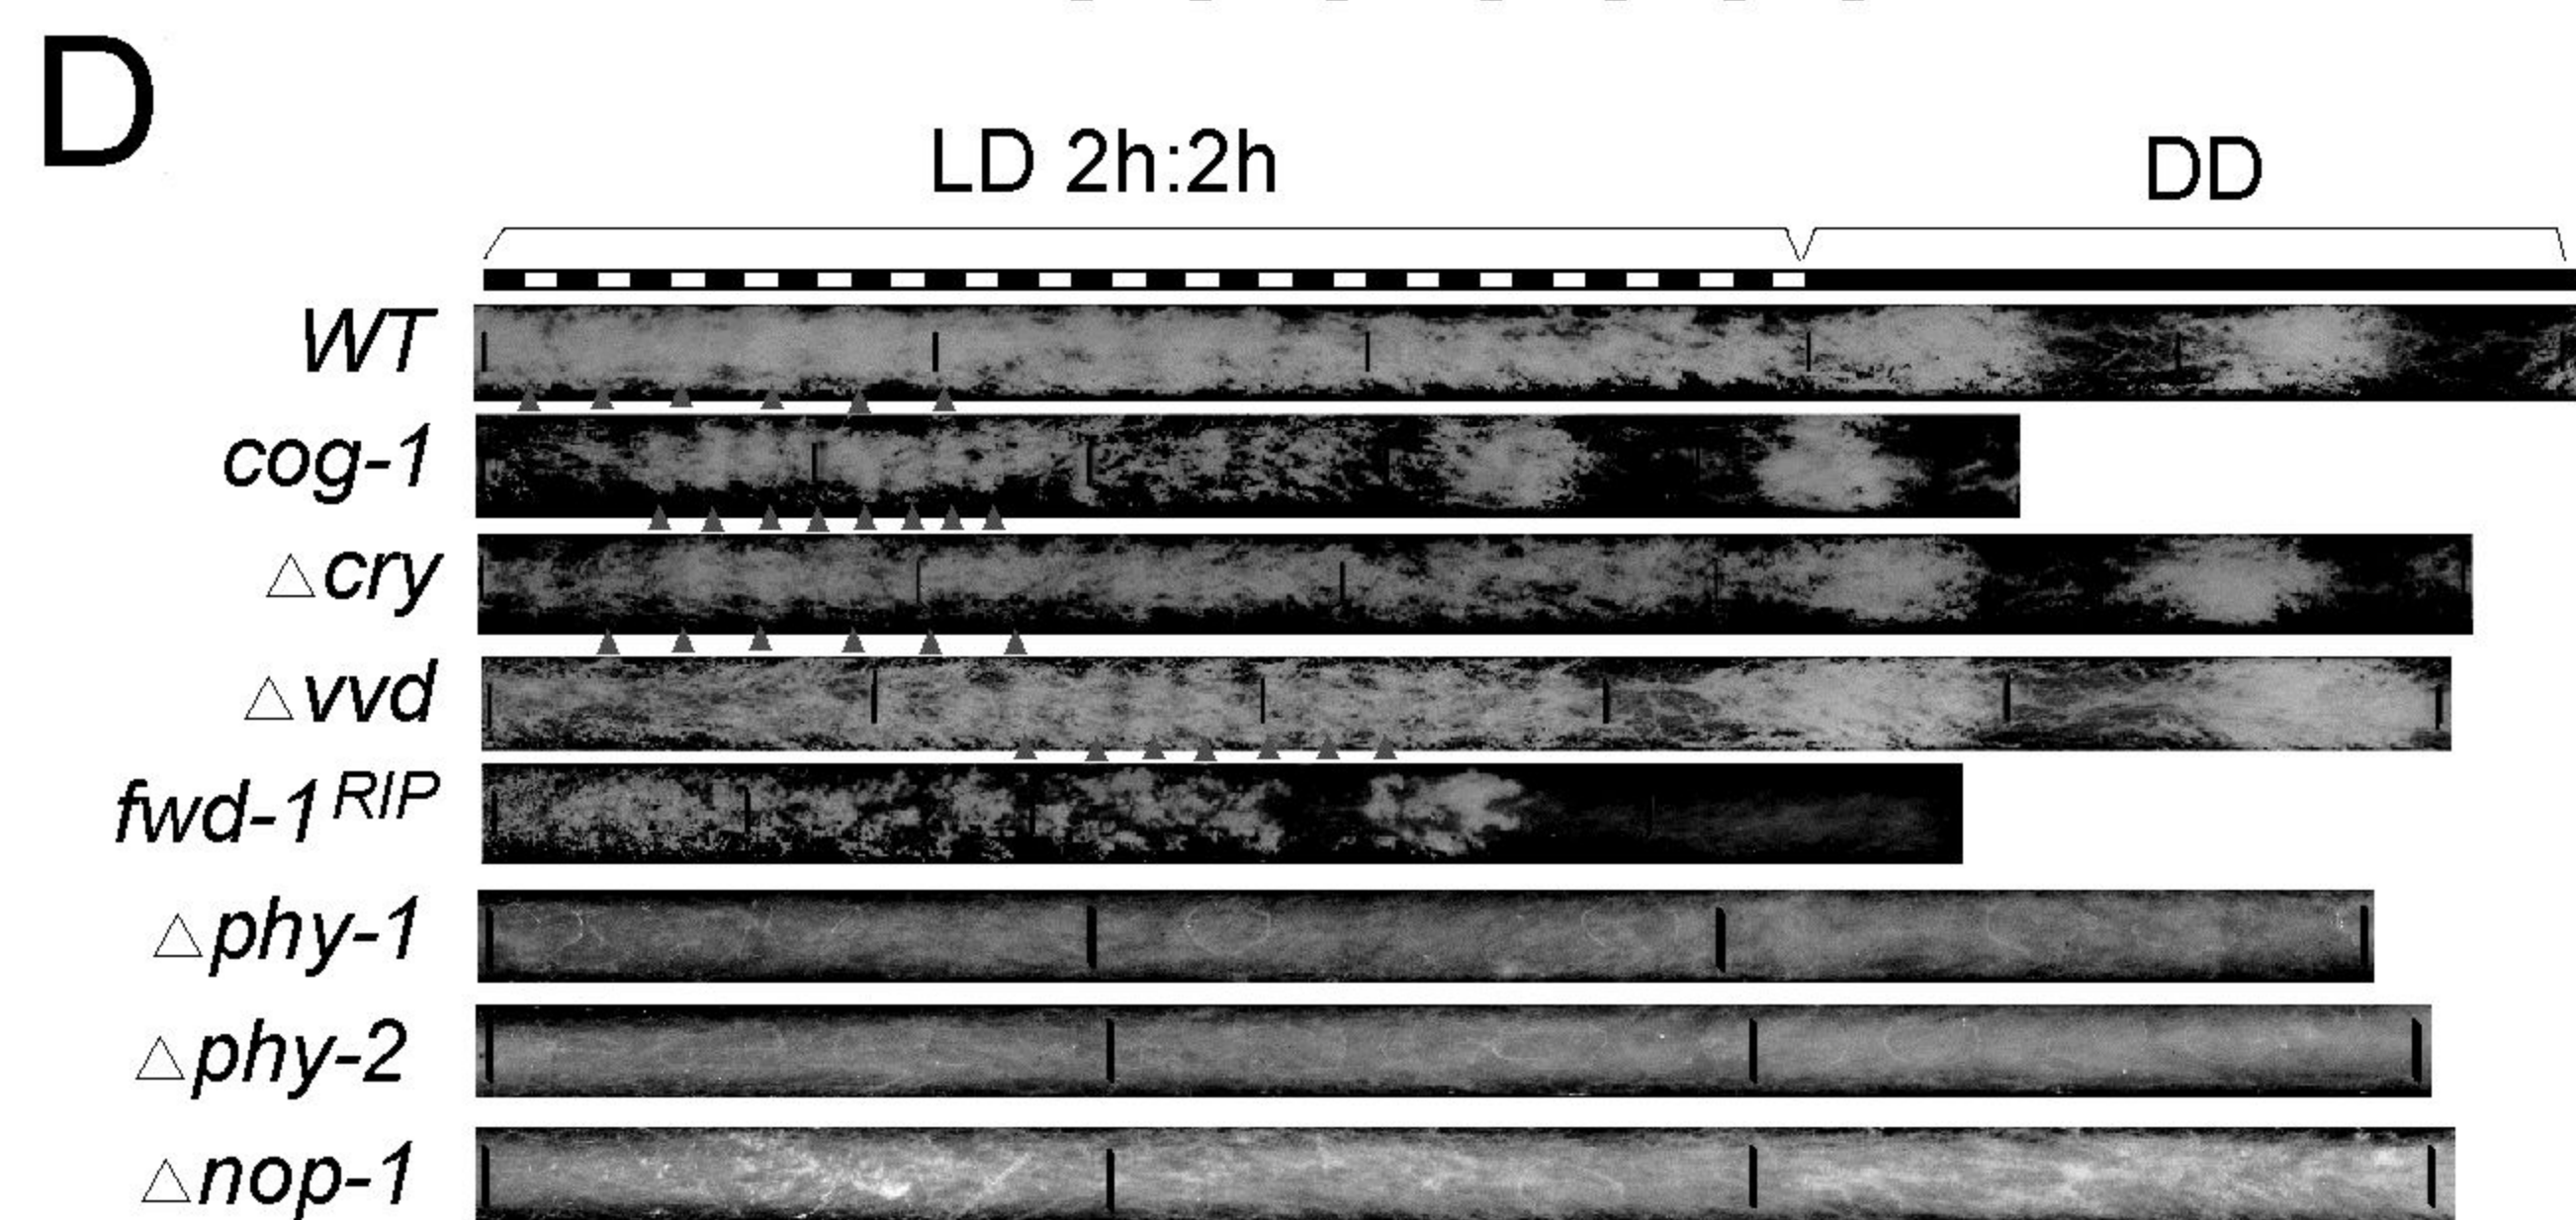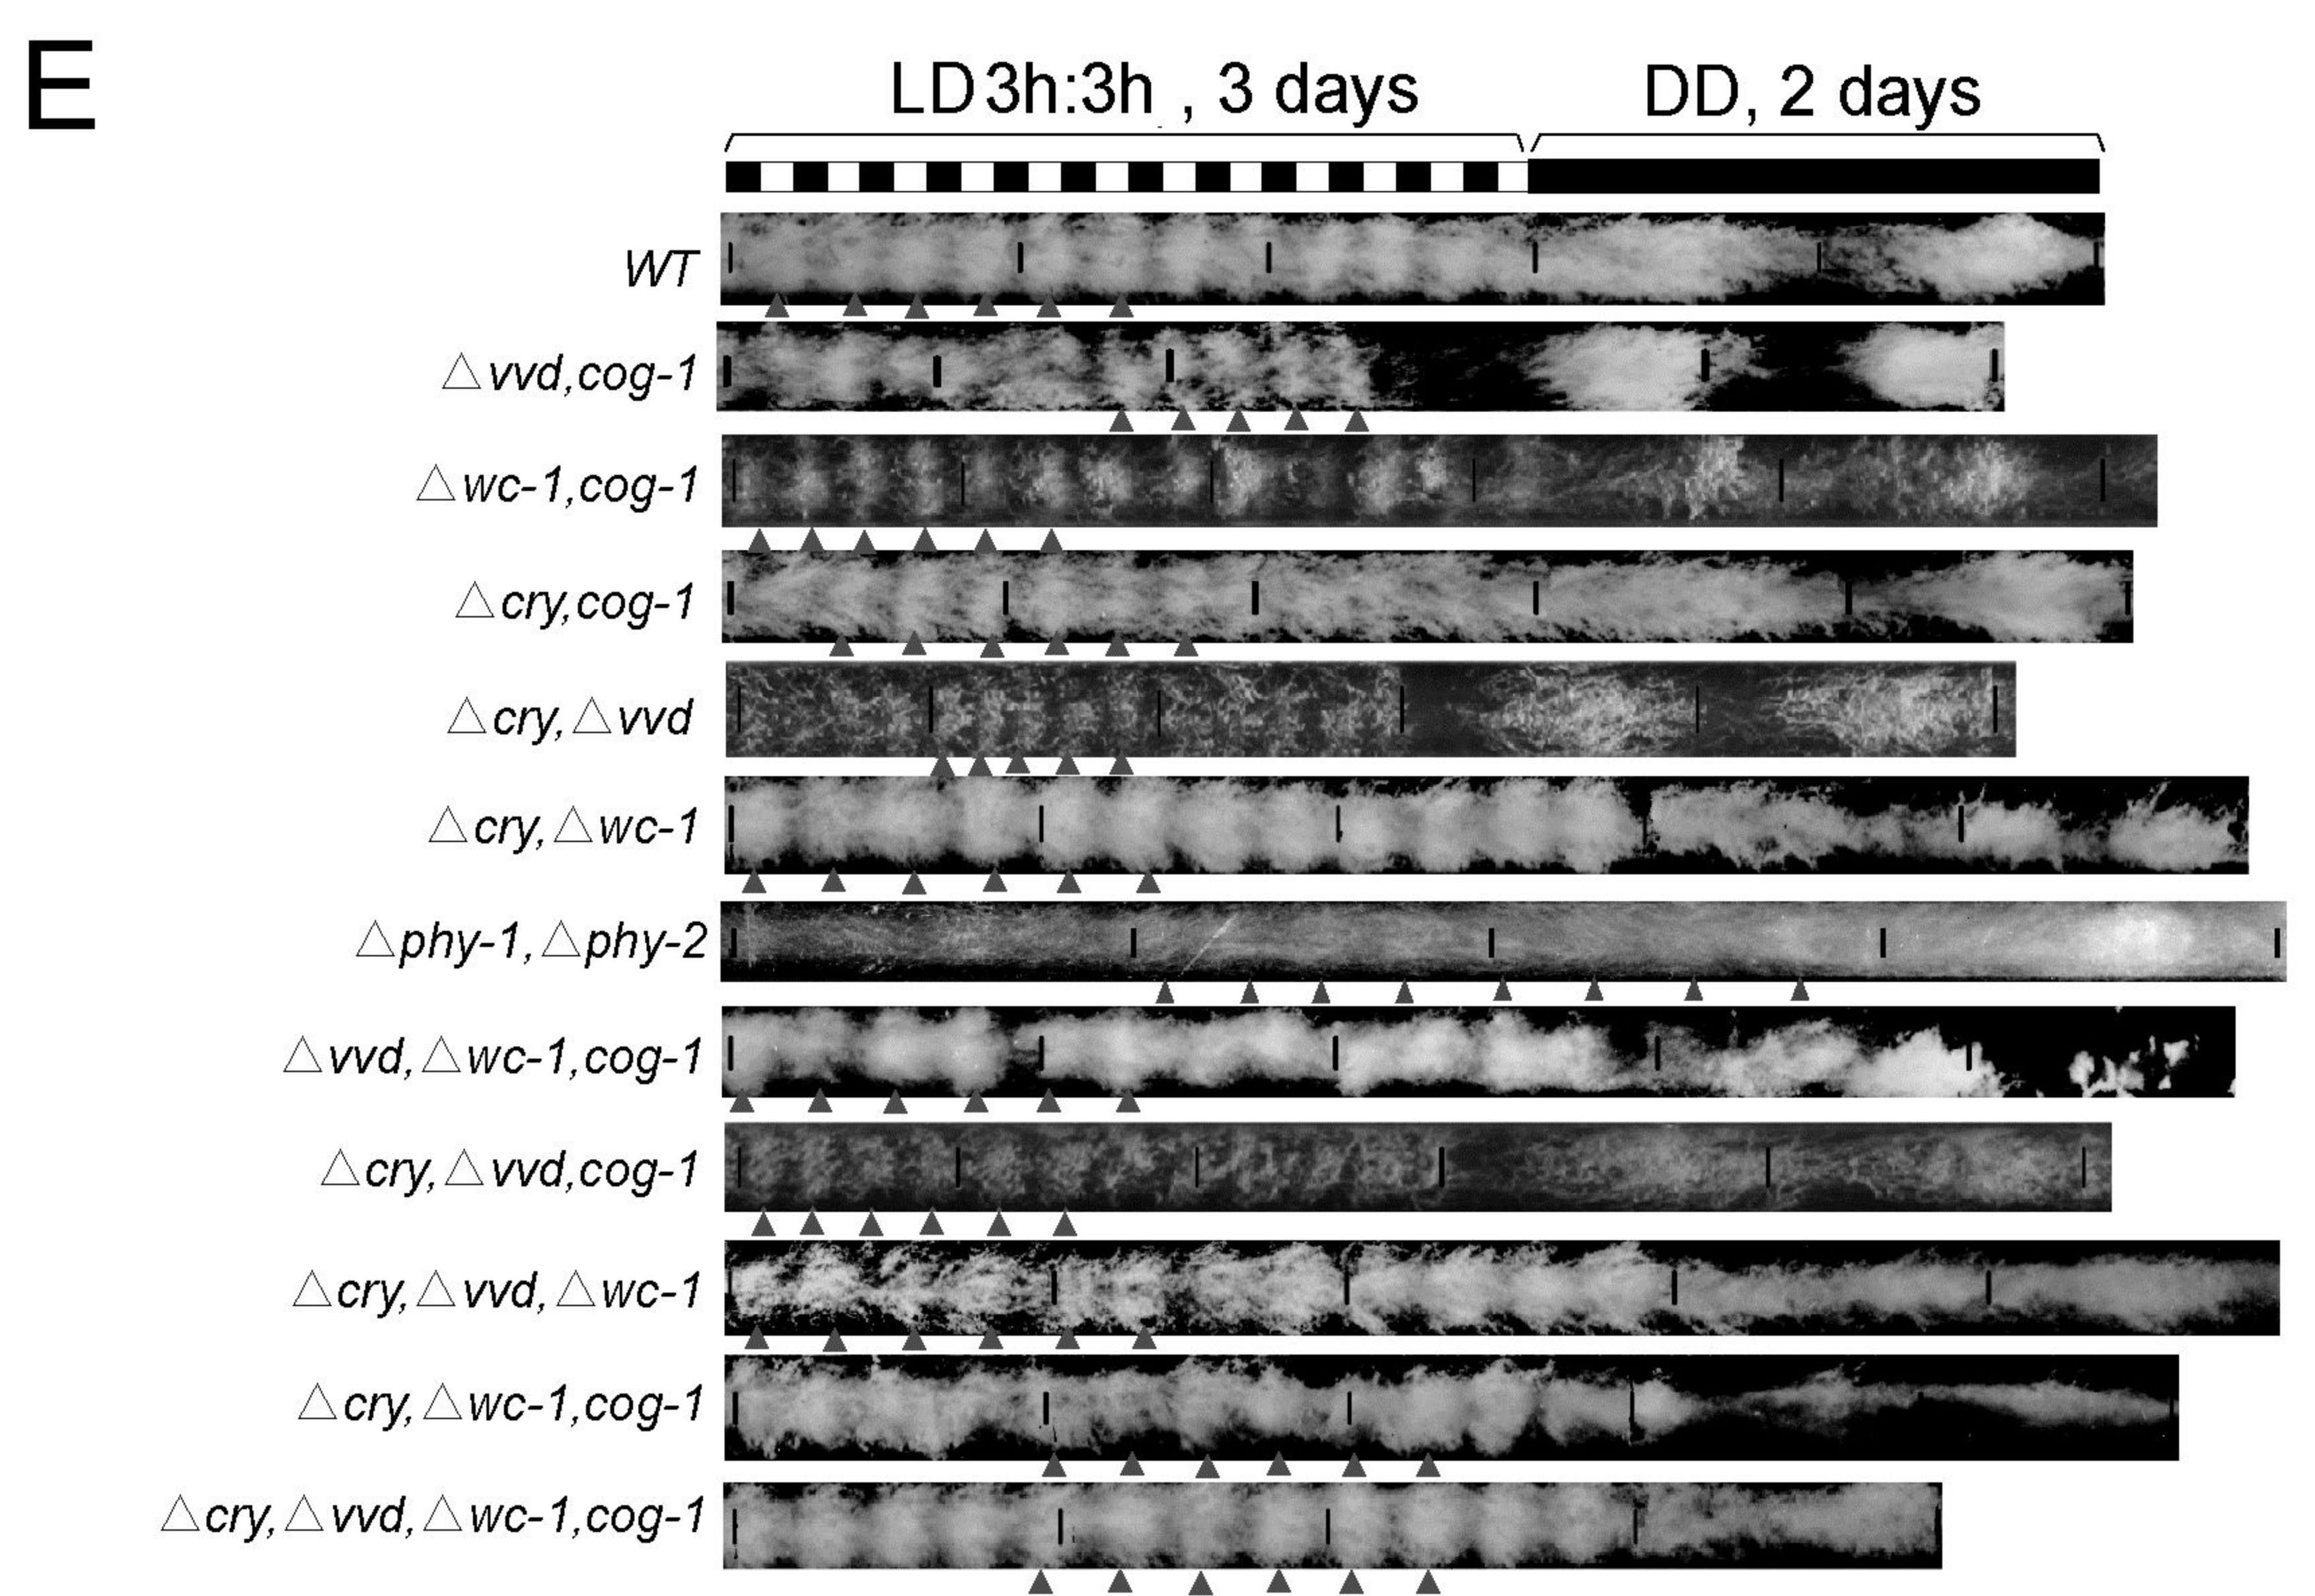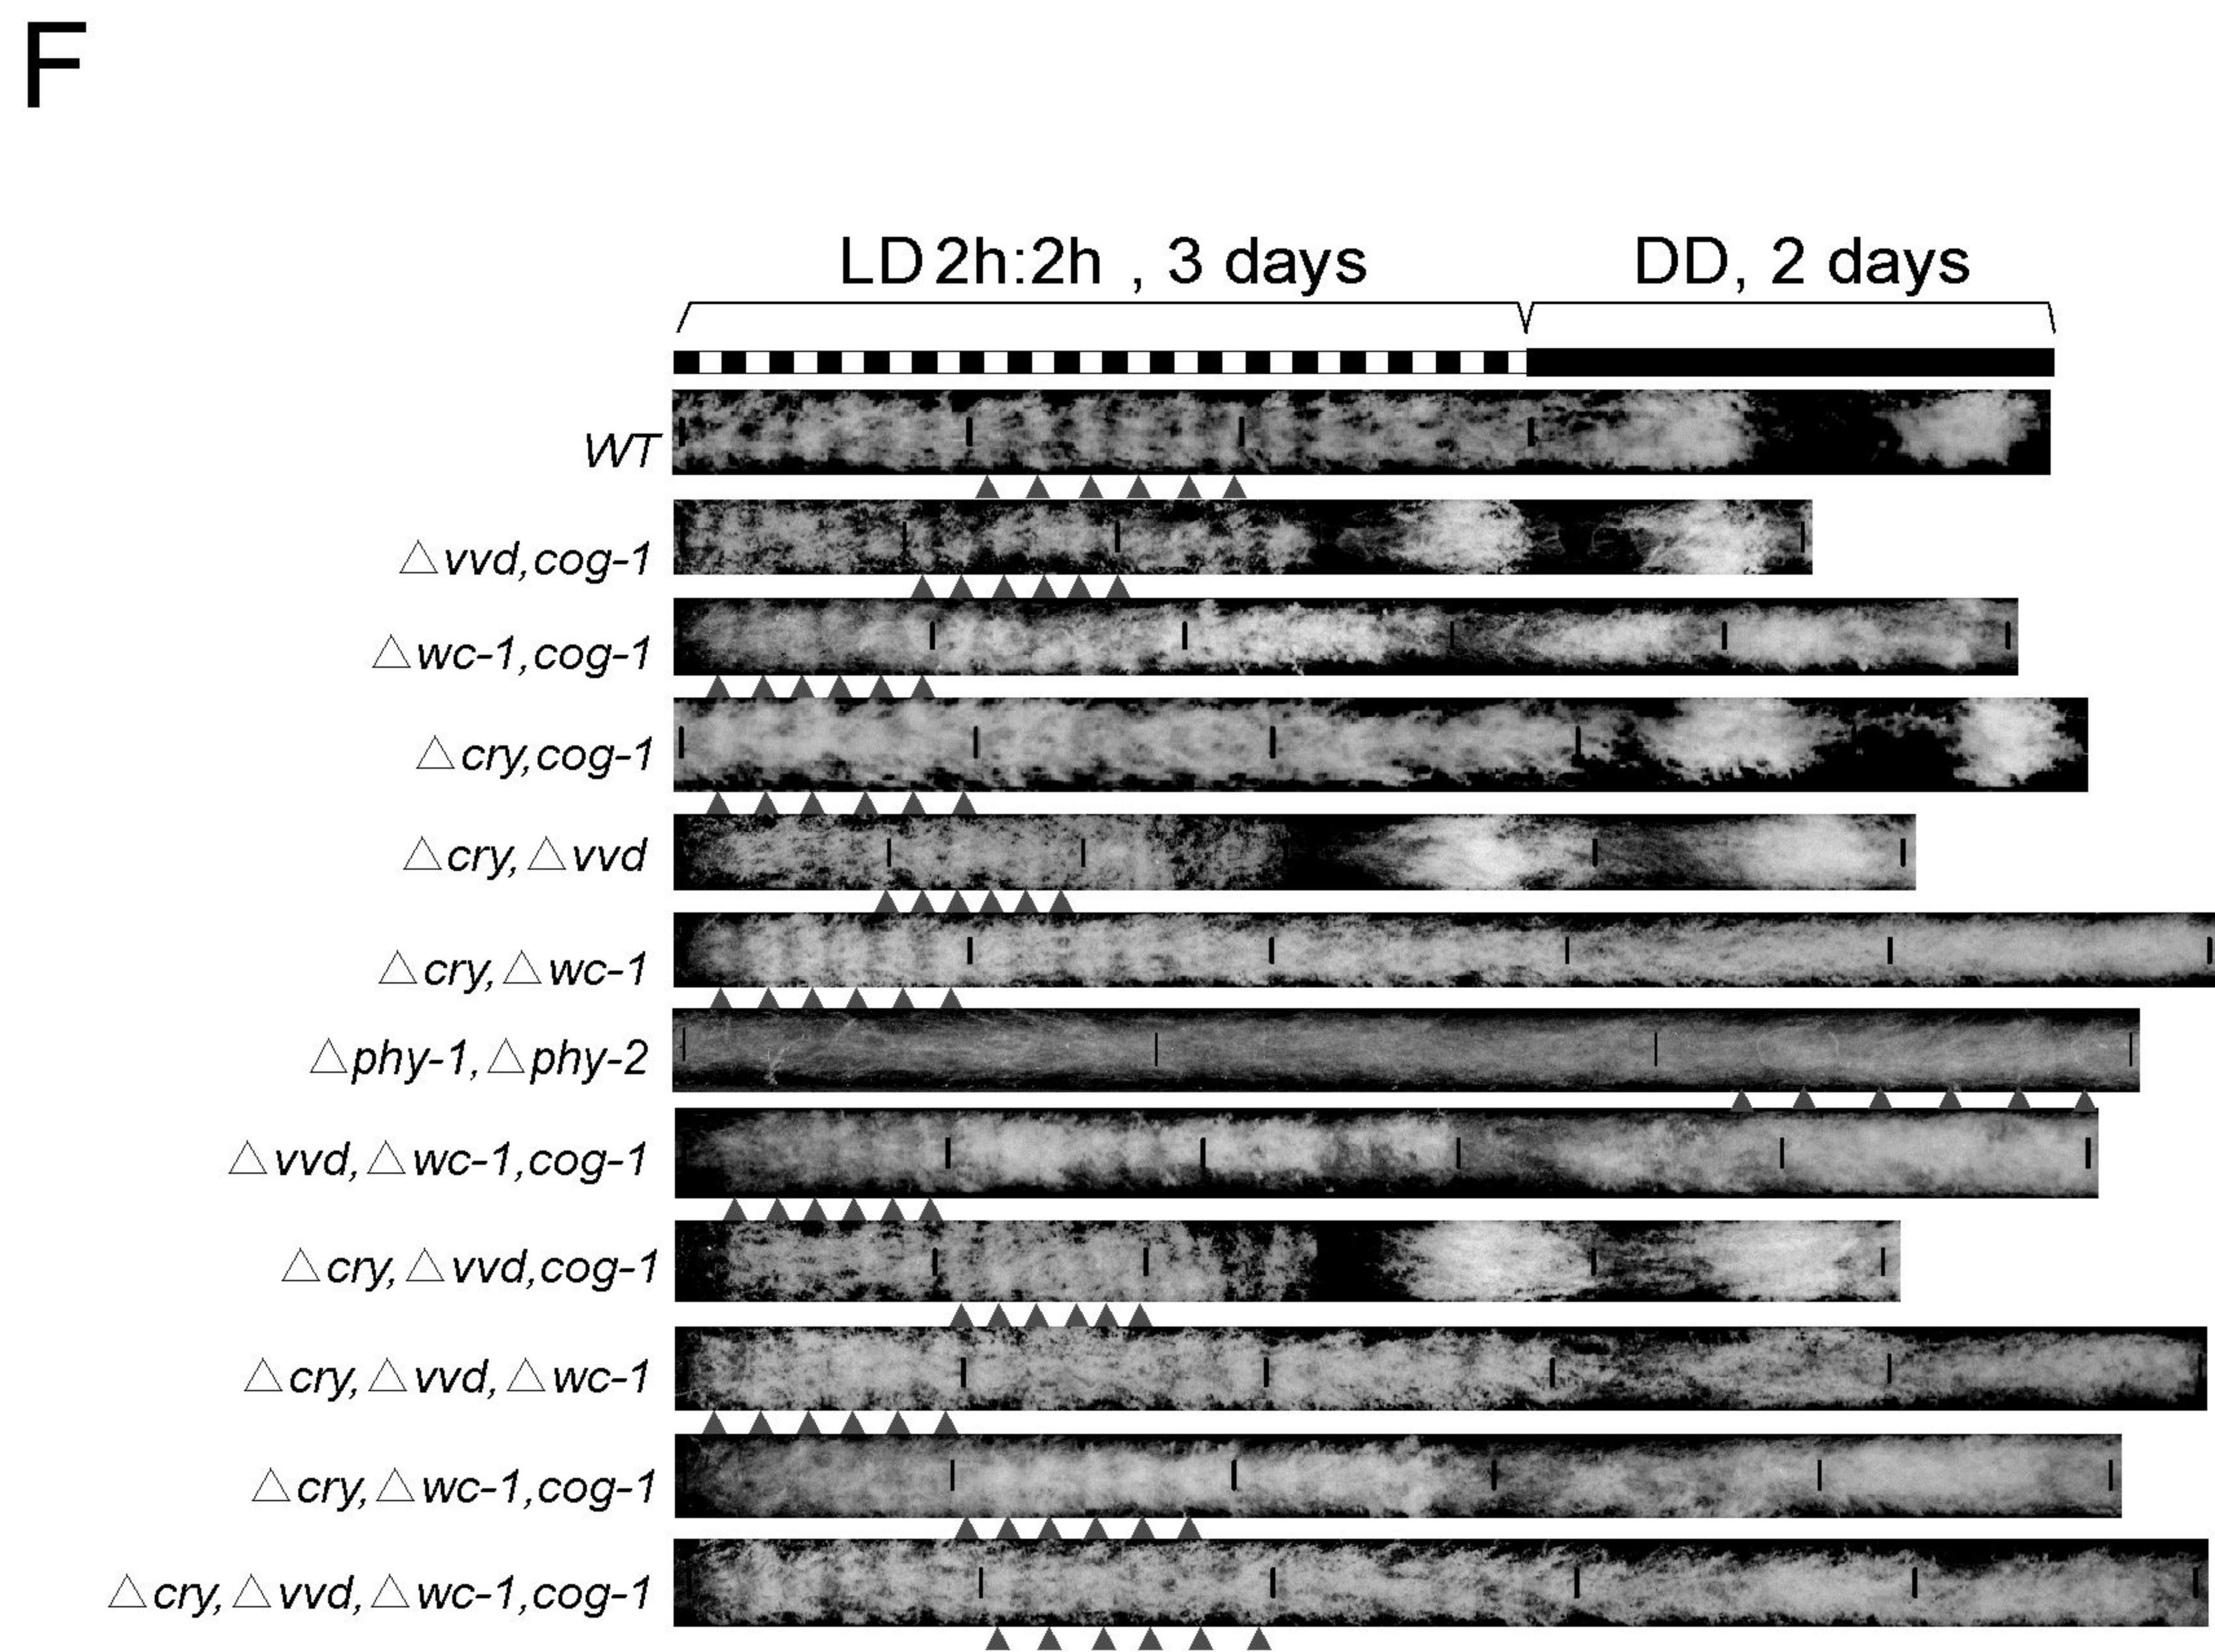

A

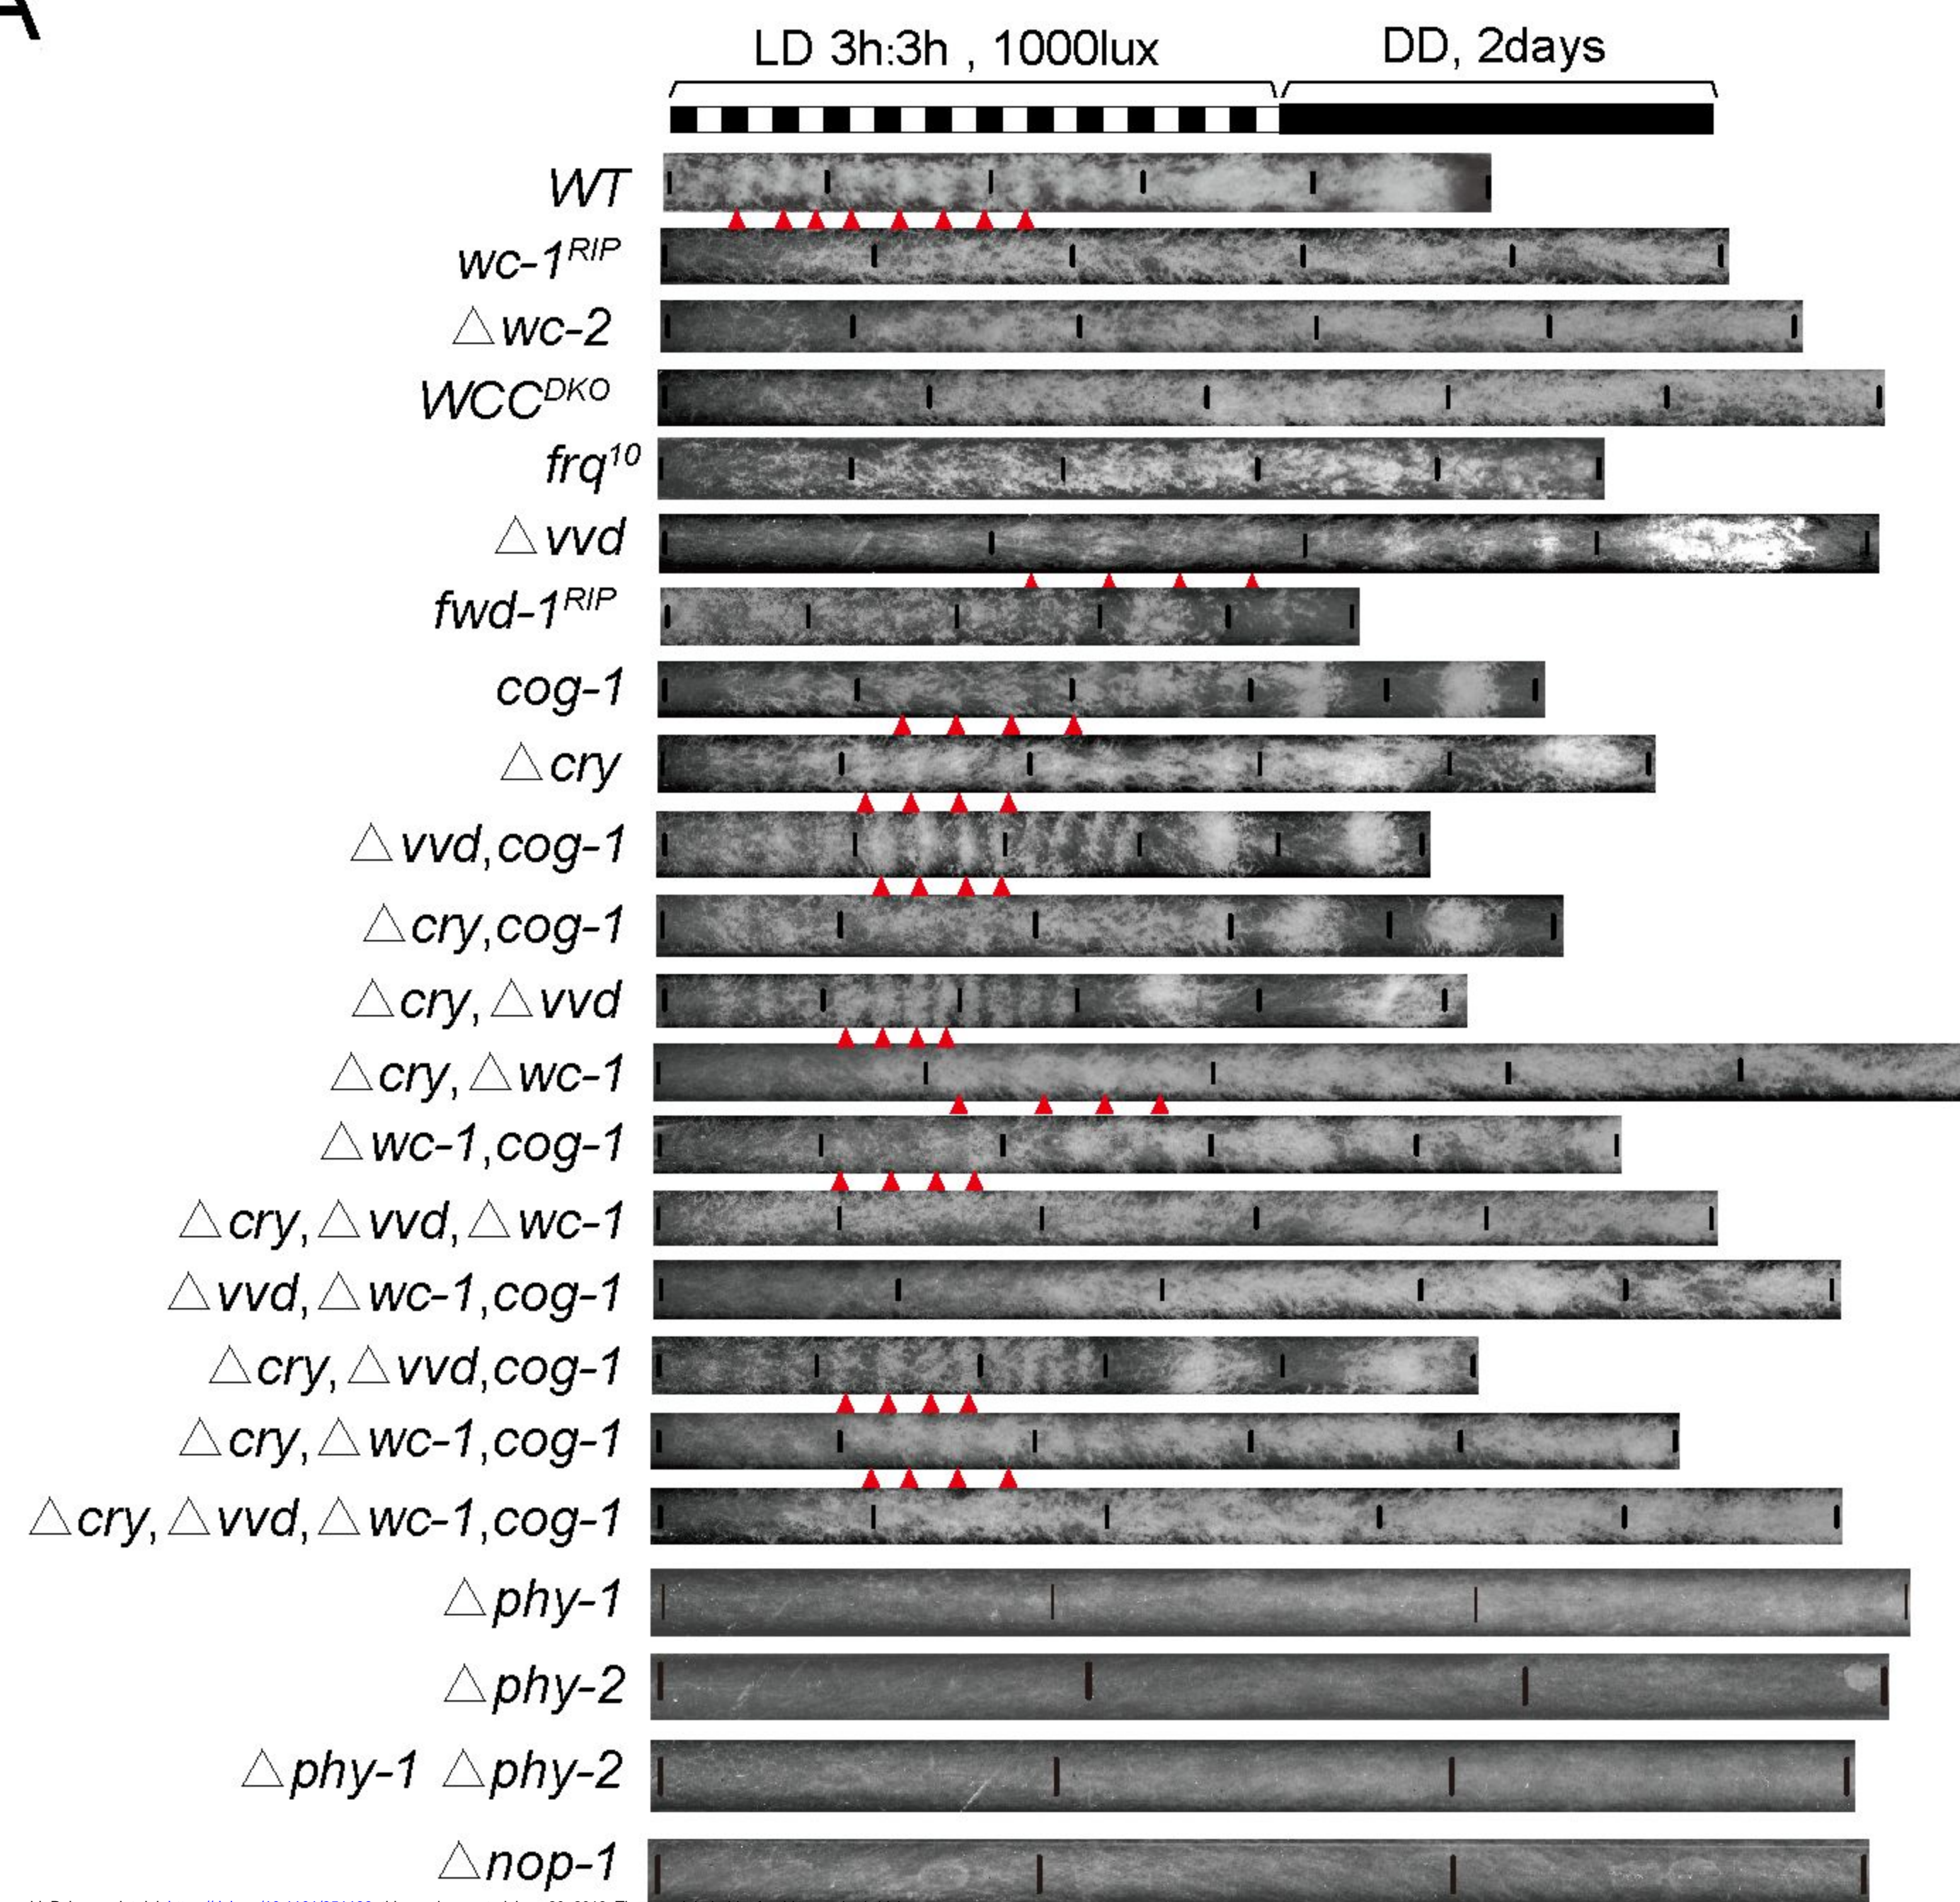

B

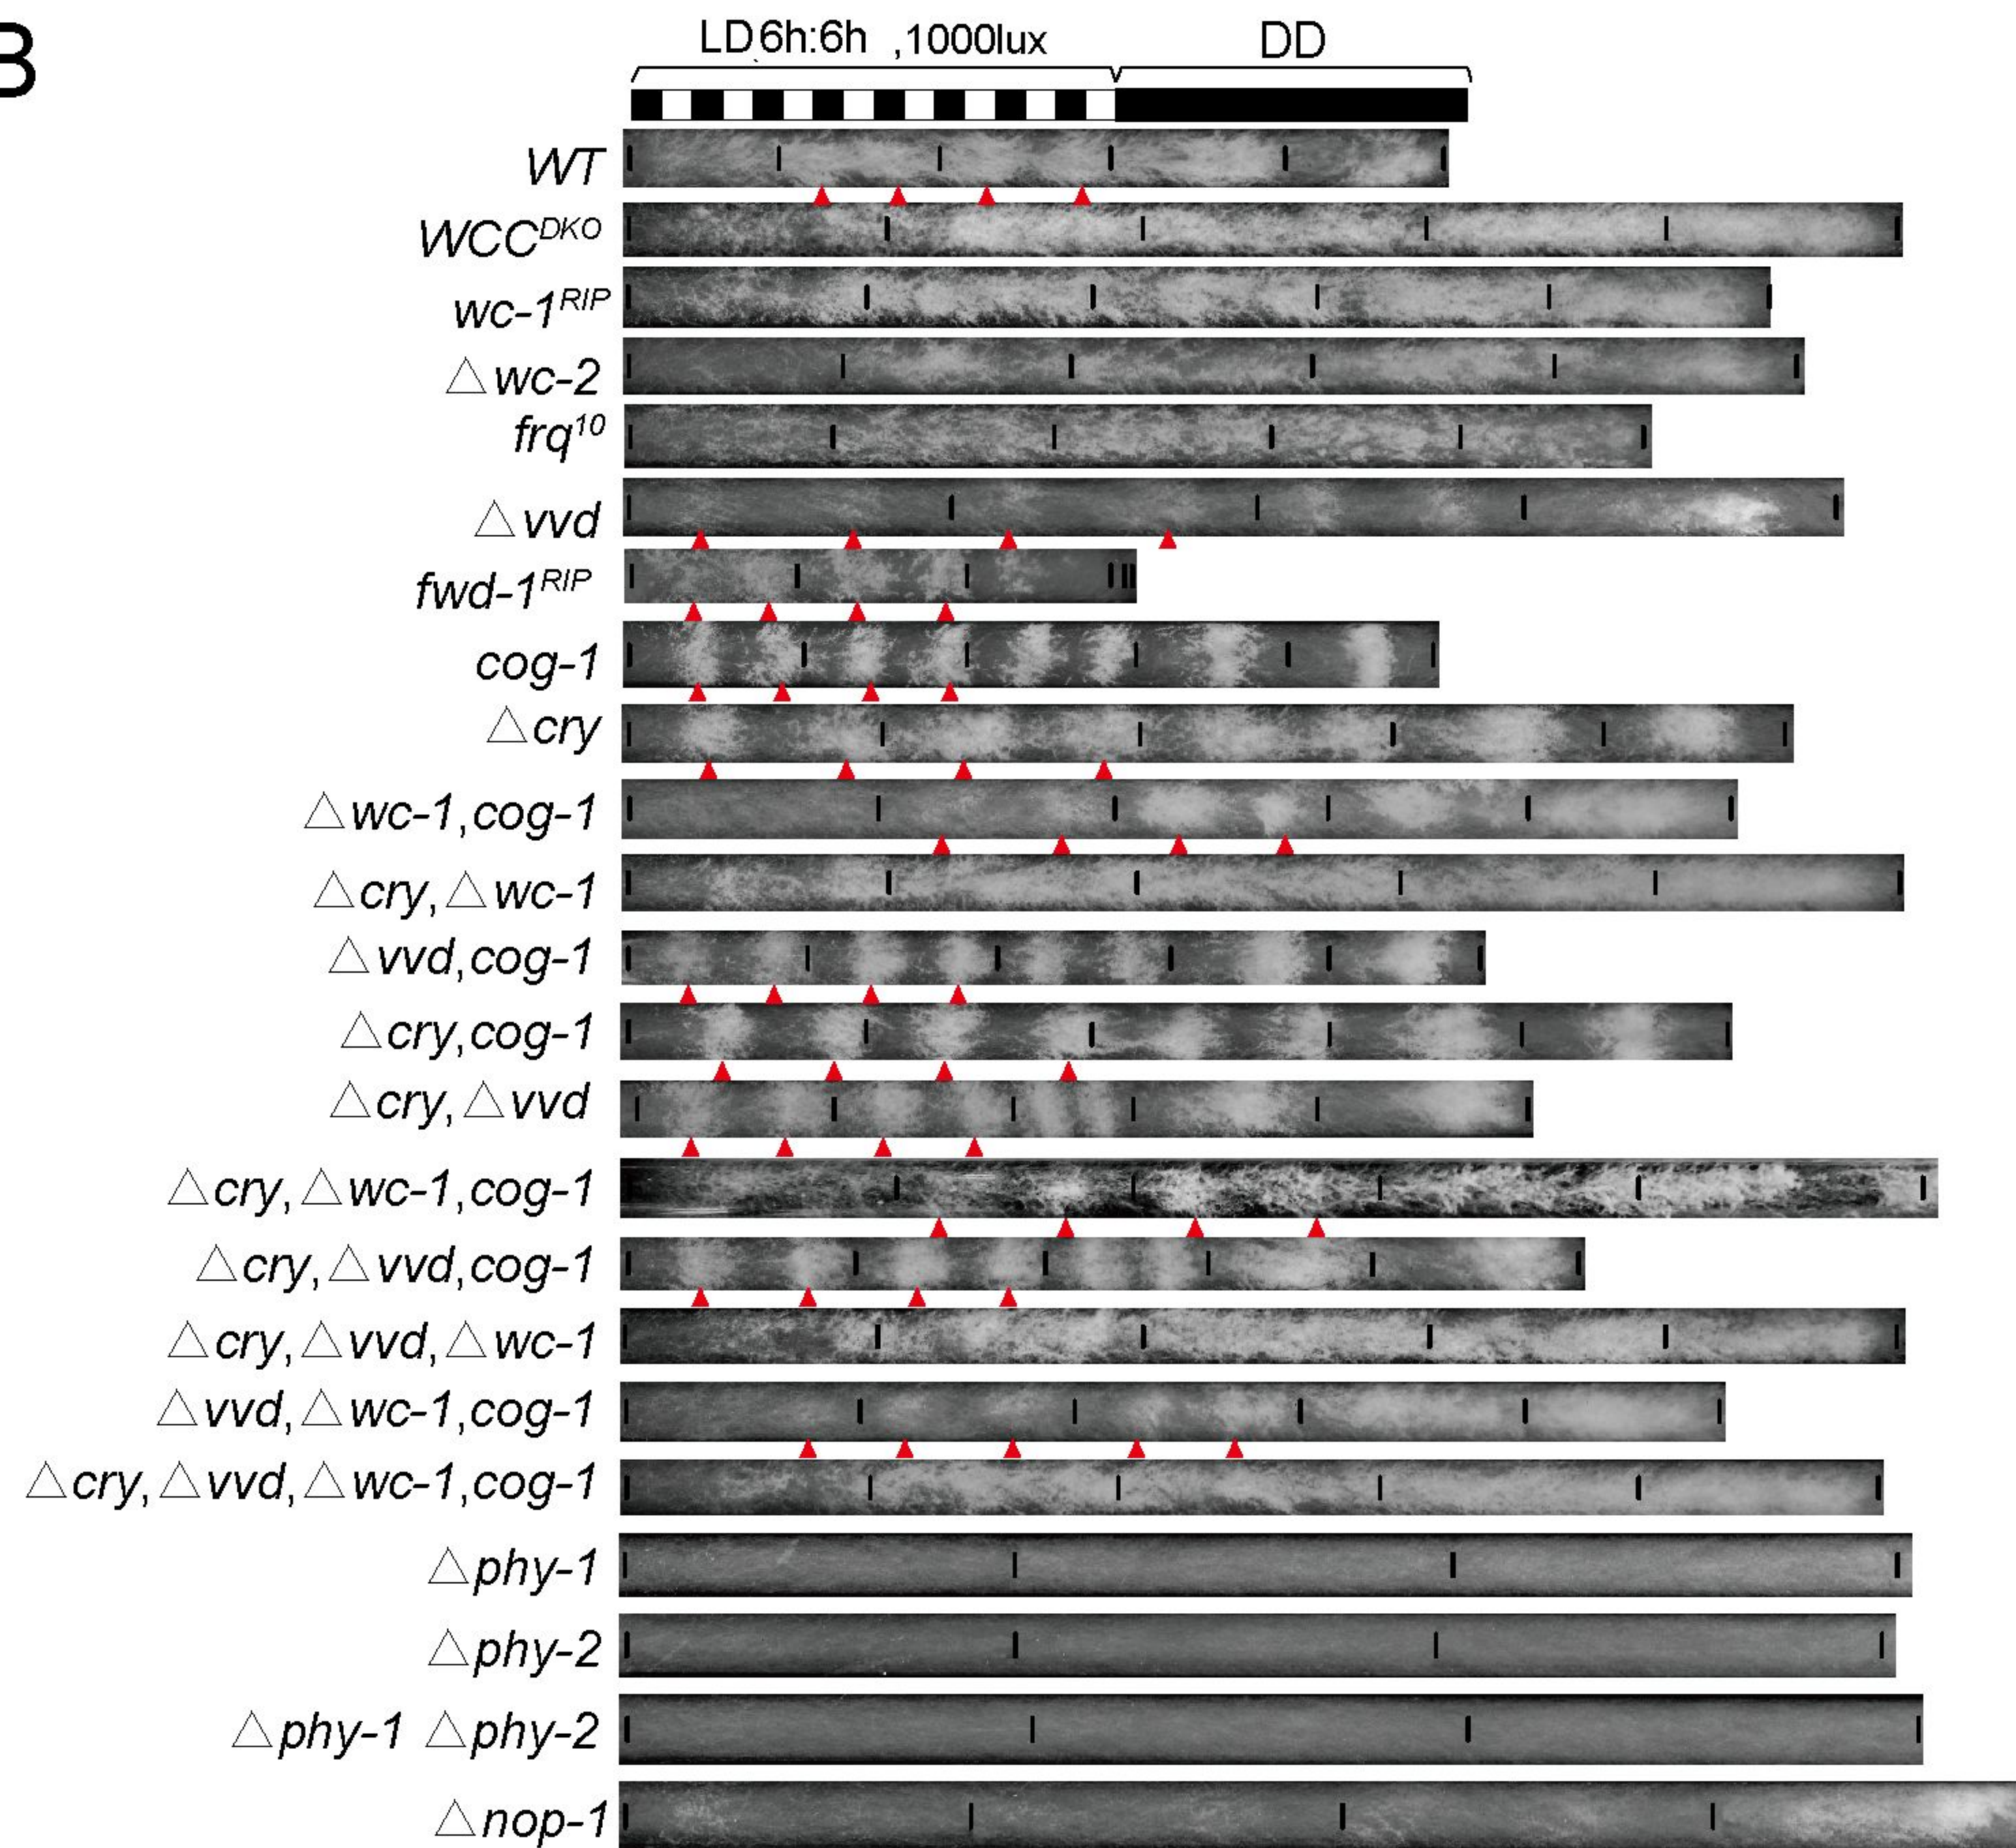

C

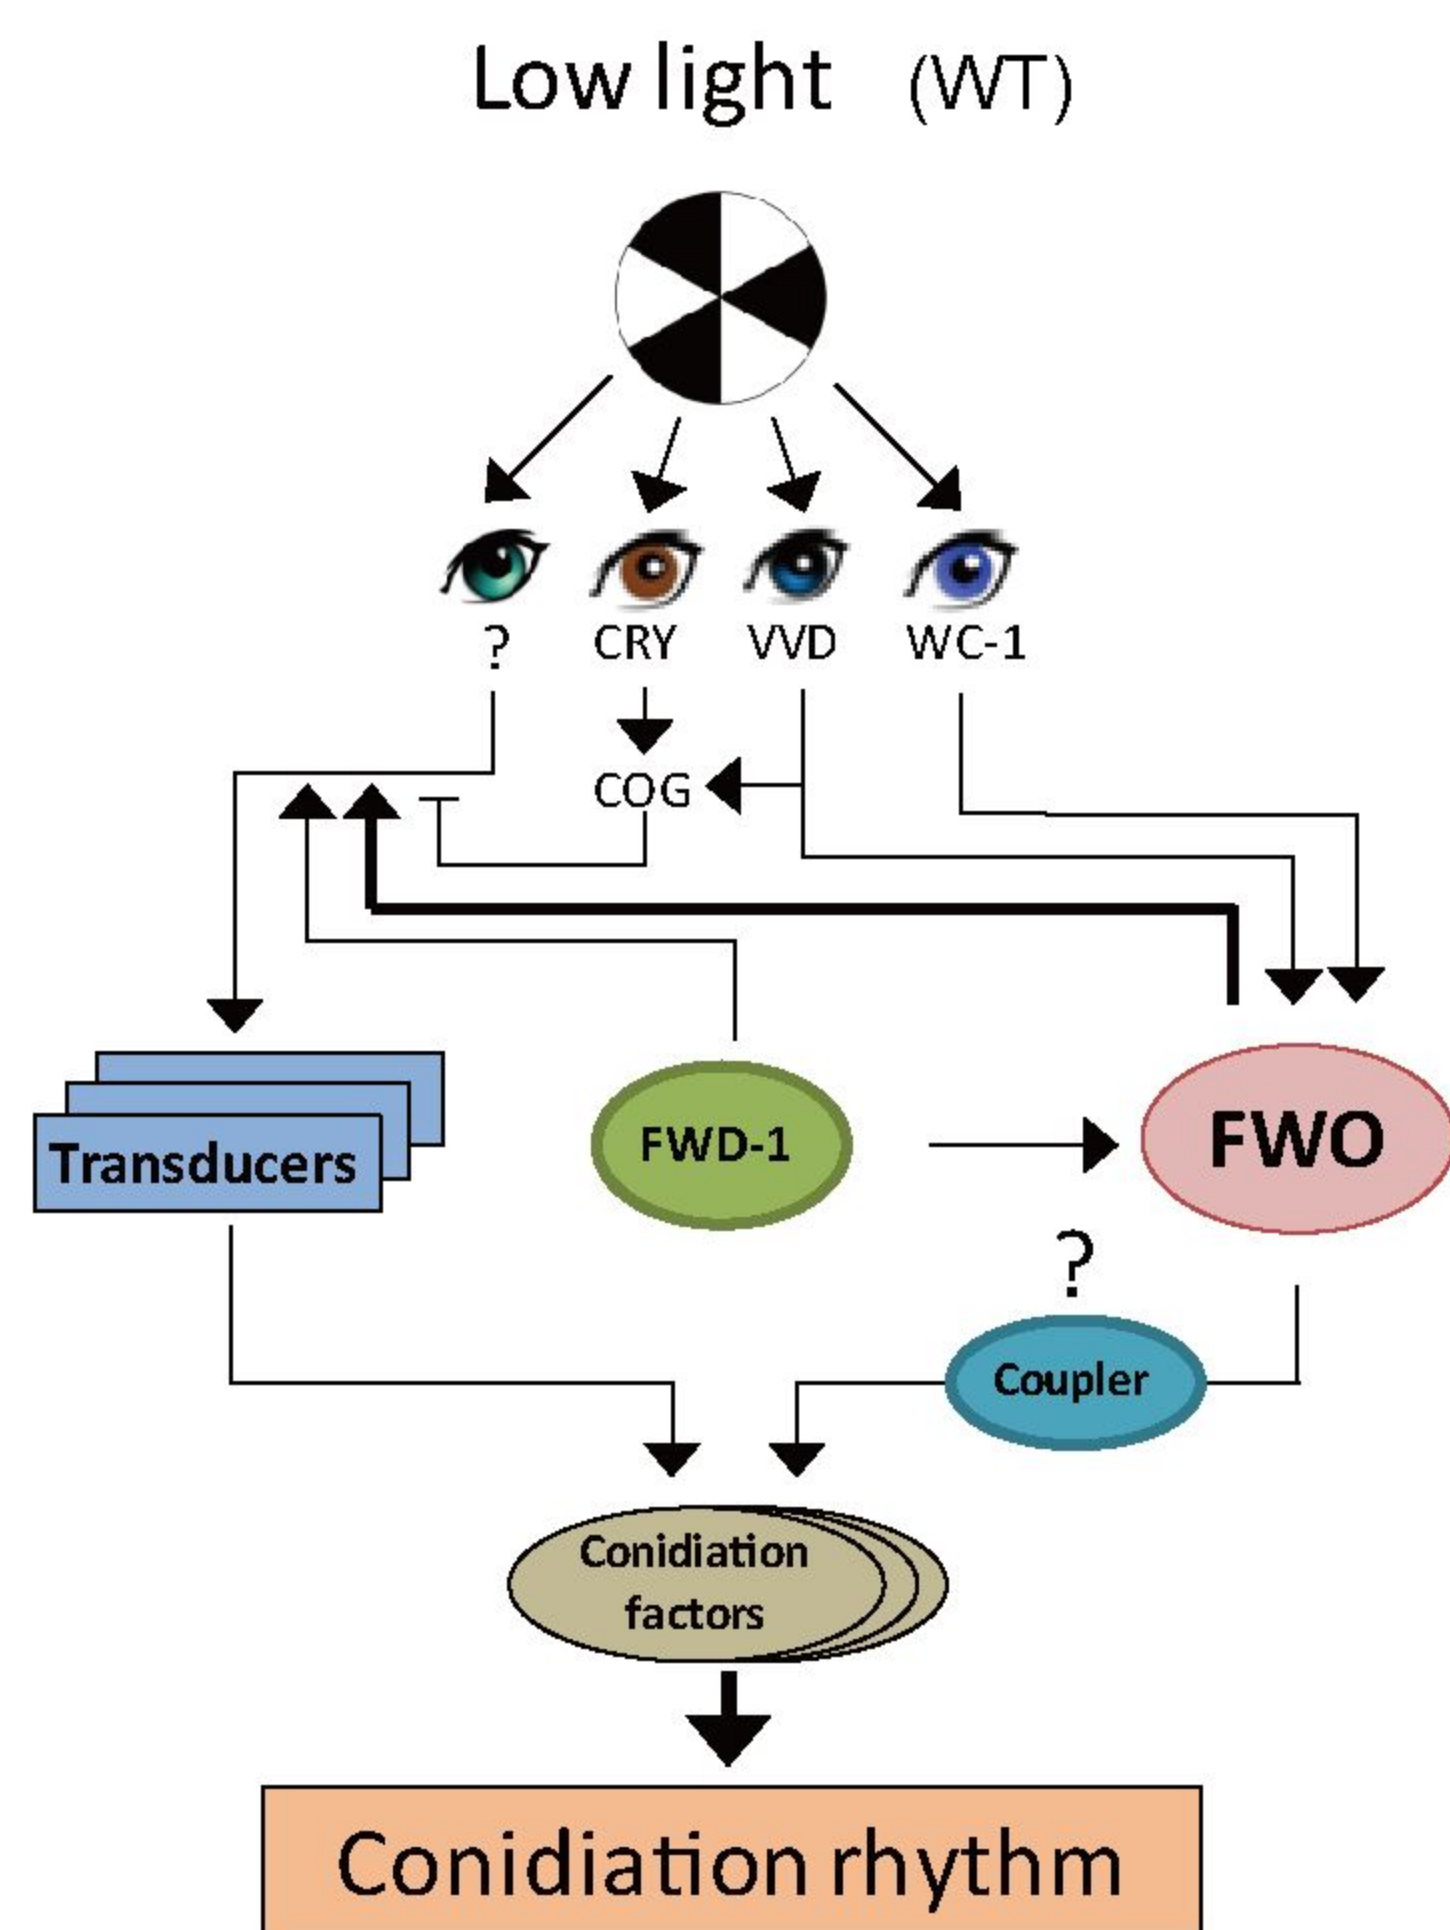

D

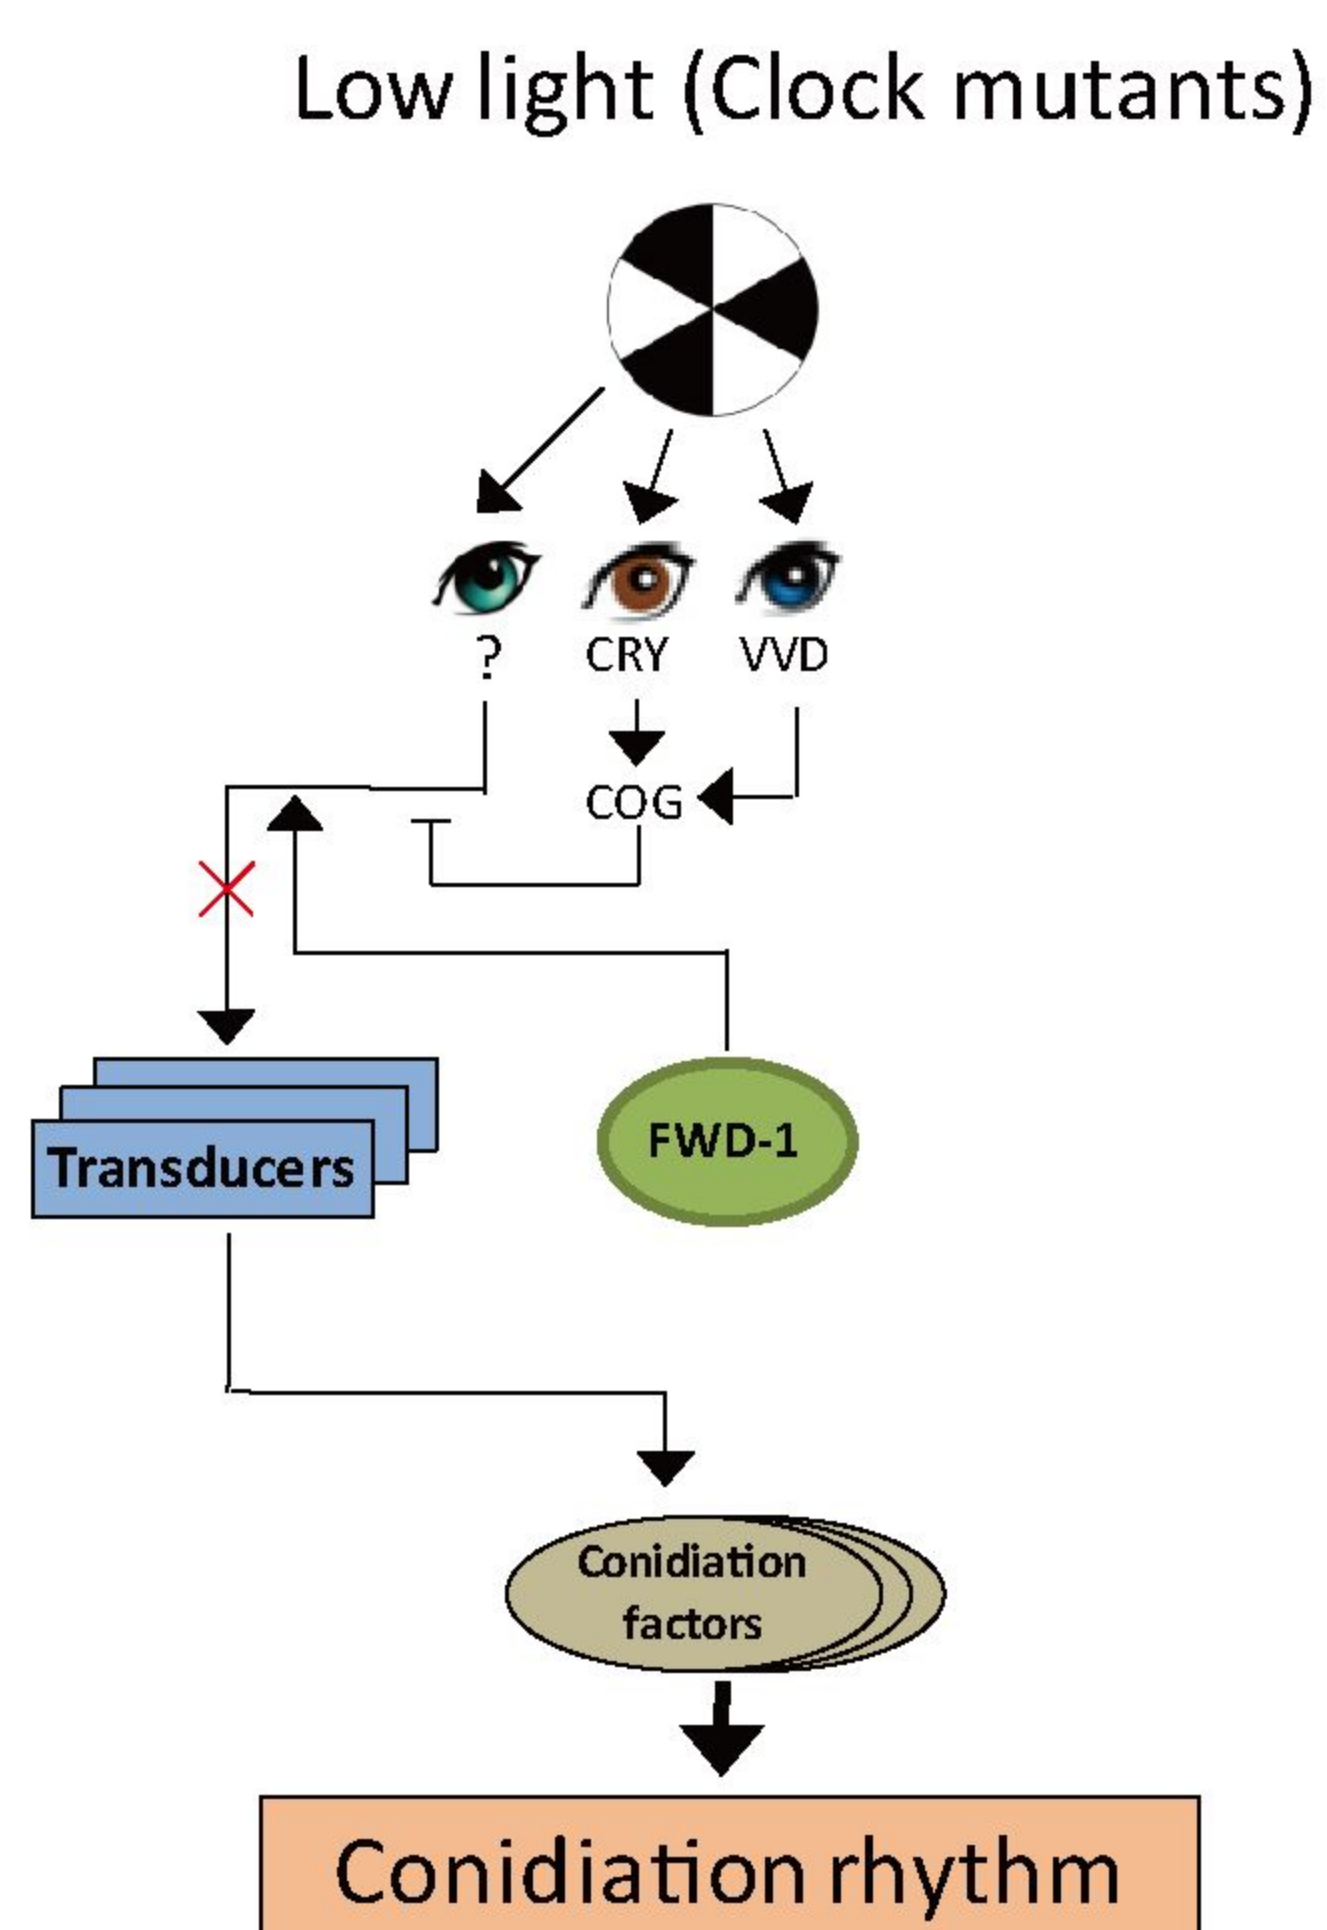

E

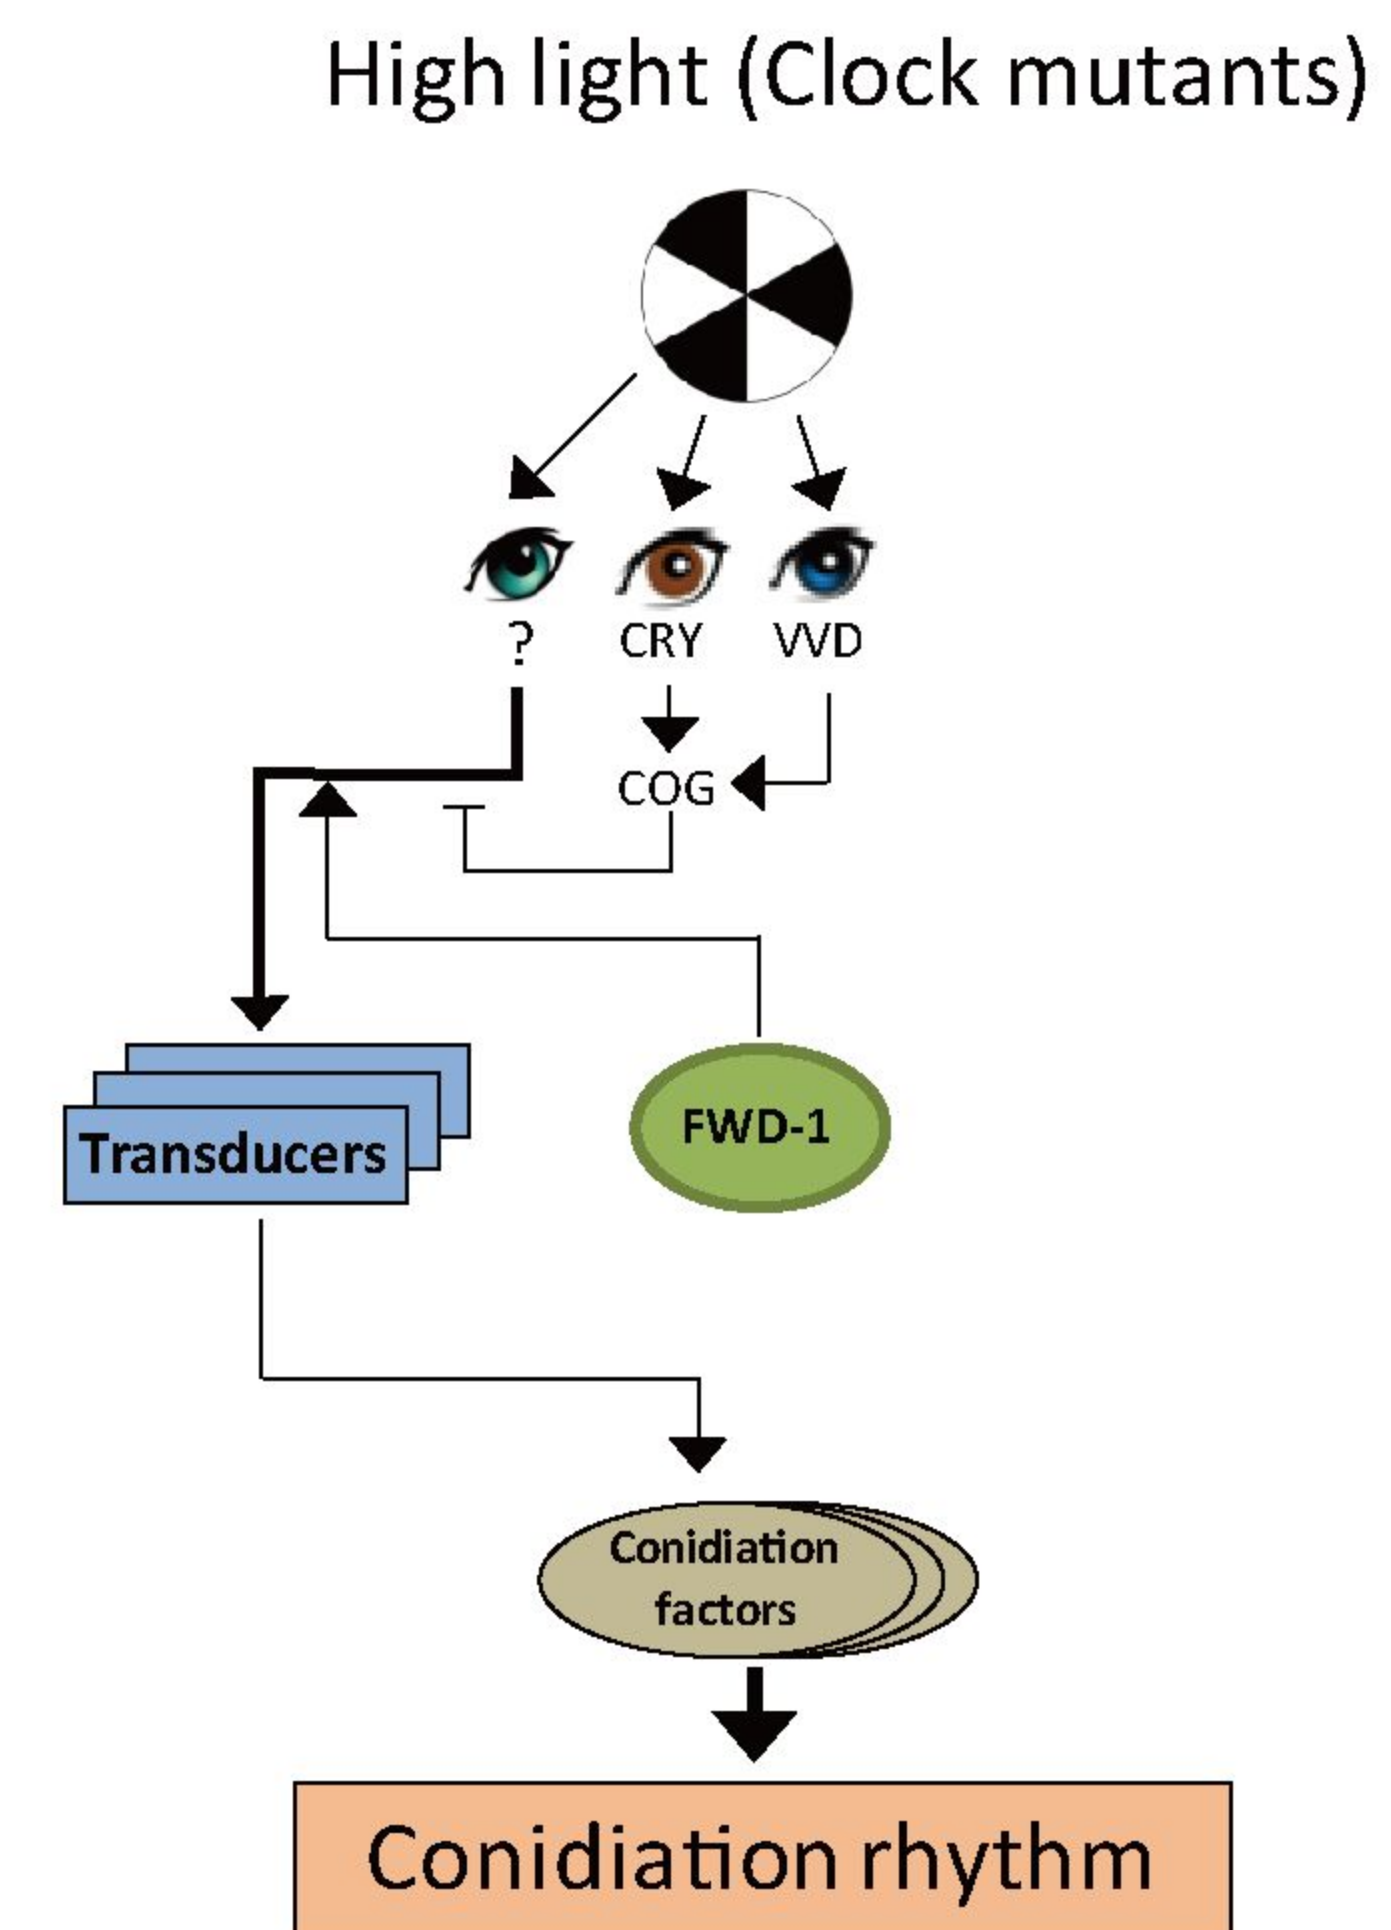

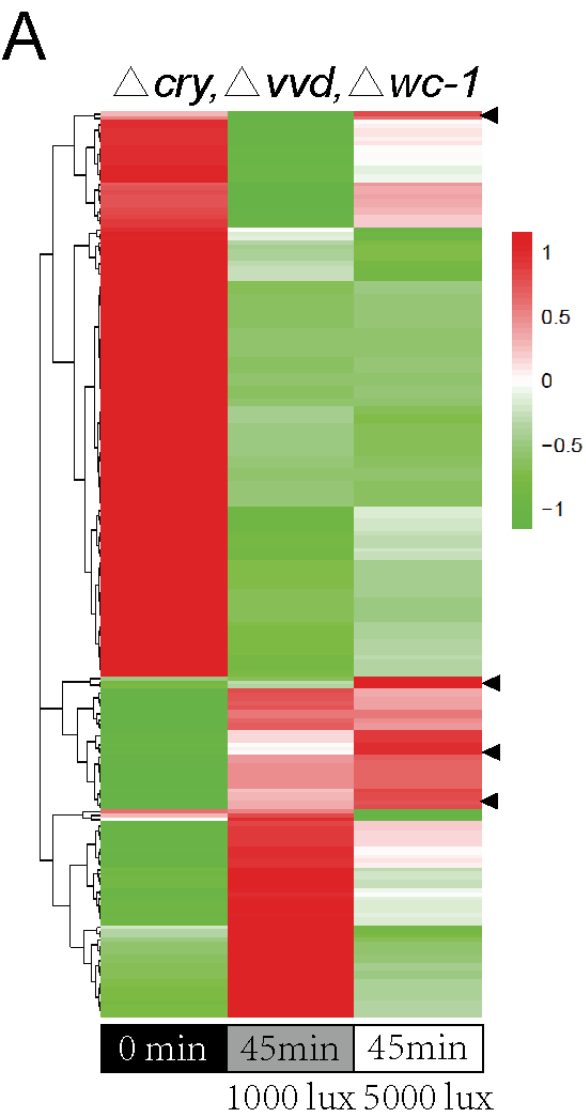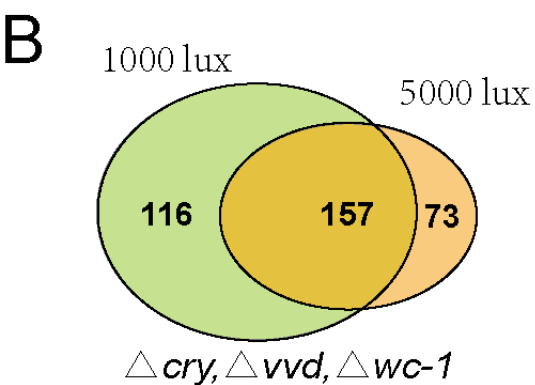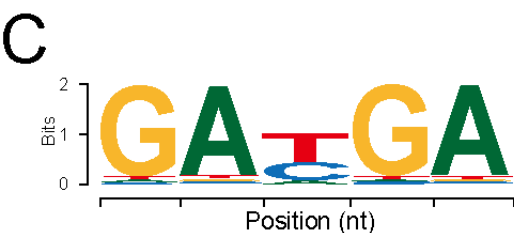

**D**

| Induced exclusively in 1000 lux          |         |
|------------------------------------------|---------|
| Term                                     | P-value |
| Ribosome biogenesis in eukaryotes        | 0.006   |
| Pentose and glucuronate interconversions | 0.021   |

| Induced in both 1000 lux and 5000 lux    |         |
|------------------------------------------|---------|
| Term                                     | P-value |
| Ribosome biogenesis in eukaryotes        | 0.000   |
| Purine metabolism                        | 0.000   |
| RNA polymerase                           | 0.001   |
| Pentose and glucuronate interconversions | 0.004   |
| Biosynthesis of secondary metabolites    | 0.012   |
| Pyrimidine metabolism                    | 0.020   |
| Biosynthesis of antibiotics              | 0.045   |
| Propanoate metabolism                    | 0.047   |

| Induced exclusively in 5000 lux   |         |
|-----------------------------------|---------|
| Term                              | P-value |
| Fatty acid biosynthesis           | 0.000   |
| Ribosome biogenesis in eukaryotes | 0.001   |
| Fatty acid metabolism             | 0.001   |
| Propanoate metabolism             | 0.011   |
| Metabolic pathways                | 0.013   |

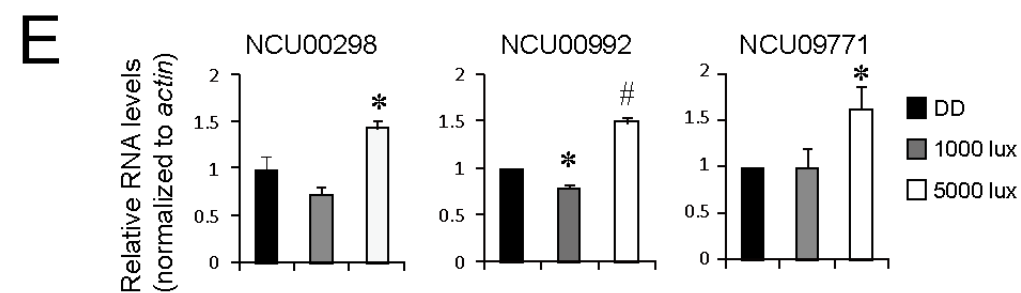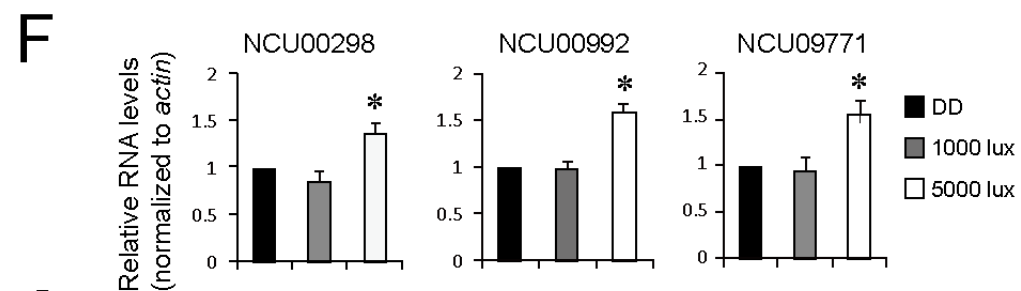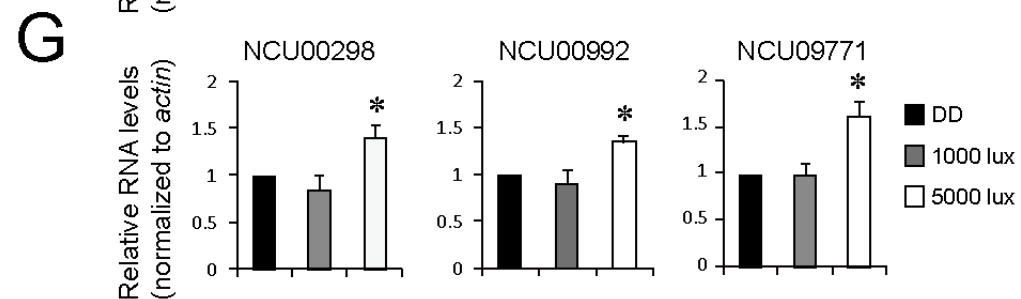

Source: https://www.biorxiv.org/content/early/2018/06/20/351189.full.pdf
